# Supplementary material for: Associations between lipid profiles of adolescents and their mothers based on a nationwide health and nutrition survey in South Korea
Source: PubMed Central journal article supplement — BMJ Open. 2019 Mar 20;9(3):e024731. doi: 10.1136/bmjopen-2018-024731 (PMC6475165; doi:10.1136/bmjopen-2018-024731), 2019-03-20
Supplement: bmjopen-2018-024731.draft_revisions.pdf [file bmjopen-2018-024731.draft_revisions.pdf]

# BMJ Open

BMJ Open is committed to open peer review. As part of this commitment we make the peer review history of every article we publish publicly available.

When an article is published we post the peer reviewers' comments and the authors' responses online. We also post the versions of the paper that were used during peer review. These are the versions that the peer review comments apply to.

The versions of the paper that follow are the versions that were submitted during the peer review process. They are not the versions of record or the final published versions. They should not be cited or distributed as the published version of this manuscript.

BMJ Open is an open access journal and the full, final, typeset and author-corrected version of record of the manuscript is available on our site with no access controls, subscription charges or pay-per-view fees (<http://bmjopen.bmj.com>).

If you have any questions on BMJ Open's open peer review process please email [editorial.bmjopen@bmj.com](mailto:editorial.bmjopen@bmj.com)

# BMJ Open

## Associations between lipid profiles of adolescents and their mothers based on a nationwide health and nutrition survey

|                               |                                                                                                                                                                                                                                                                                                                                                                                                                                                                                                                                                                                                                                                                                                                                                                                                                                                                                                                                                                                  |
|-------------------------------|----------------------------------------------------------------------------------------------------------------------------------------------------------------------------------------------------------------------------------------------------------------------------------------------------------------------------------------------------------------------------------------------------------------------------------------------------------------------------------------------------------------------------------------------------------------------------------------------------------------------------------------------------------------------------------------------------------------------------------------------------------------------------------------------------------------------------------------------------------------------------------------------------------------------------------------------------------------------------------|
| Journal:                      | <i>BMJ Open</i>                                                                                                                                                                                                                                                                                                                                                                                                                                                                                                                                                                                                                                                                                                                                                                                                                                                                                                                                                                  |
| Manuscript ID                 | bmjopen-2018-024731                                                                                                                                                                                                                                                                                                                                                                                                                                                                                                                                                                                                                                                                                                                                                                                                                                                                                                                                                              |
| Article Type:                 | Research                                                                                                                                                                                                                                                                                                                                                                                                                                                                                                                                                                                                                                                                                                                                                                                                                                                                                                                                                                         |
| Date Submitted by the Author: | 18-Jun-2018                                                                                                                                                                                                                                                                                                                                                                                                                                                                                                                                                                                                                                                                                                                                                                                                                                                                                                                                                                      |
| Complete List of Authors:     | Nam, Ji Hyung; Department of Internal Medicine, Dongguk University Ilsan Hospital, Dongguk University College of Medicine<br>Shin, Jaeyong ; Department of Preventive Medicine & Institute of Health Services Research, Yonsei University College of Medicine<br>Jang, Sung-In; College of Medicine Yonsei University, Department of Preventive Medicine<br>Kim, Ji Hyun ; Department of Pediatrics, Dongguk University Ilsan Hospital, Dongguk University College of Medicine<br>Han, Kyu-Tae ; Research and Analysis Team, National Health Insurance Service Ilsan Hospital<br>Lee, Jun Kyu ; Department of Internal Medicine, Dongguk University Ilsan Hospital, Dongguk University College of Medicine<br>Lim, Yun Jeong ; Department of Internal Medicine, Dongguk University Ilsan Hospital, Dongguk University College of Medicine<br>Park, Eun-Cheol; Yonsei University College of Medicine, Department of Preventive Medicine and Institute of Health Services Research |
| Keywords:                     | Dyslipidemia, Cholesterol, Lipids, Adolescent, Mother                                                                                                                                                                                                                                                                                                                                                                                                                                                                                                                                                                                                                                                                                                                                                                                                                                                                                                                            |
|                               |                                                                                                                                                                                                                                                                                                                                                                                                                                                                                                                                                                                                                                                                                                                                                                                                                                                                                                                                                                                  |

SCHOLARONE™  
Manuscripts

1  
2  
3 **1 Associations between lipid profiles of adolescents and their mothers based**  
4  
5 **2 on a nationwide health and nutrition survey**  
6  
7

8  
9  
10 4 Ji Hyung Nam,<sup>1,2</sup> Jaeyong Shin,<sup>3</sup> Sung-In Jang,<sup>3</sup> Ji Hyun Kim,<sup>4</sup> Kyu-Tae Han,<sup>5</sup> Jun Kyu Lee,<sup>1</sup>  
11  
12 5 Yun Jeong Lim,<sup>1</sup> Eun-Cheol Park<sup>3</sup>  
13  
14  
15  
16

17 <sup>1</sup> Department of Internal Medicine, Dongguk University Ilsan Hospital, Dongguk University  
18  
19 College of Medicine, Goyang, Republic of Korea

20  
21 <sup>2</sup> Department of Medicine, Graduate School, Yonsei University, Seoul, Republic of Korea

22  
23 <sup>3</sup> Department of Preventive Medicine & Institute of Health Services Research, Yonsei  
24  
25 University College of Medicine, Seoul, Republic of Korea

26  
27 <sup>4</sup> Department of Pediatrics, Dongguk University Ilsan Hospital, Dongguk University College  
28  
29 of Medicine, Goyang, Republic of Korea

30  
31 <sup>5</sup> Research and Analysis Team, National Health Insurance Service Ilsan Hospital, Goyang,  
32  
33 Republic of Korea  
34  
35

36  
37  
38 Correspondence to

39  
40 Eun-Cheol Park, MD, PhD

41  
42 Department of Preventive Medicine & Institute of Health Services Research

43  
44 Yonsei University College of Medicine

45  
46 50-1 Yonsei-ro, Seodaemun-gu, Seoul, 03722, Republic of Korea

47  
48 Phone number: 82-2-2228-1862 / Fax number: 82-2-392-8133

49  
50 E-mail: [ecpark@yuhs.ac](mailto:ecpark@yuhs.ac)  
51  
52  
53  
54  
55  
56  
57  
58  
59  
60

## 26 ABSTRACT

27 **Objectives** Dyslipidemia is a metabolic disease influenced by environmental and genetic  
28 factors. Especially family history related to the genetic backgrounds is a strong risk factor of  
29 lipid abnormality. The aim of this study is to evaluate the association between the lipid  
30 profiles of adolescents and their mothers.

31 **Design** A cross-sectional study.

32 **Setting** The data were derived from the Korea National Health and Nutrition Examination  
33 Survey (KNHANES IV-VI) between 2009 and 2015.

34 **Participants** 2884 adolescents aged 12-18 years and their mothers were included.

35 **Primary outcome measures** Outcome variables were adolescents' lipid levels. Mothers'  
36 lipid levels were interesting variables. The lipid profiles included total cholesterol (TC),  
37 triglyceride (TG), high-density lipoprotein cholesterol (HDL-C), and low-density lipoprotein  
38 cholesterol (LDL-C). Multiple linear regressions were performed to identify an amount  
39 change in adolescents' lipid levels by each unit increase of their mothers' lipids. The  
40 regression models included various clinical characteristics and health behavioral factors of  
41 both adolescents and mothers.

42 **Results** The mean levels of adolescents' lipids were 156.6, 83.6, 50.4, and 89.4 mg/dL,  
43 respectively for TC, TG, HDL-C, and LDL-C. Positive correlations between lipid levels of  
44 adolescents and mothers were observed for TC, TG, HDL-C, and LDL-C ( $r = 0.257, 0.200,$   
45  $0.275,$  and  $0.274,$  respectively). Adolescent TC level was increased by 0.23 mg/dL for each  
46 unit increase of their mother's TC ( $P < .001$ ). The beta coefficients were 0.16, 0.24, and 0.24,  
47 respectively, in each model of TG, HDL-C, and LDL-C (all  $P < .001$ ). The linear relationships  
48 were more prominent in the non-dyslipidemic mothers' group.

49 **Conclusions** Mothers' lipid levels are associated with adolescents' lipids, therefore, it can  
50 serve as a reference for the screening of adolescent's dyslipidemia. Moreover, mother's

1  
2  
3  
4  
5  
6  
7  
8  
9  
10  
11  
12  
13  
14  
15  
16  
17  
18  
19  
20  
21  
22  
23  
24  
25  
26  
27  
28  
29  
30  
31  
32  
33  
34  
35  
36  
37  
38  
39  
40  
41  
42  
43  
44  
45  
46  
47  
48  
49  
50  
51  
52  
53  
54  
55  
56  
57  
58  
59  
60

51 perception to dyslipidemia seems to have a positive effect on offspring's lipid control by  
52 affecting health behavioral factors.

53 Keywords: Dyslipidemia, Cholesterol, Lipids, Adolescent, Mother.

For peer review only

1  
2  
3 76 **Strengths and limitations of this study**  
4

5  
6 77 ▶ This study analyzed linear relationships of lipid profiles between adolescents and their  
7  
8 78 mothers. We adjusted for various health behavioral factors of adolescents and their mothers,  
9  
10 79 as well as using a large national database.  
11

12  
13 80 ▶ Relationships between lipids of adolescents and their mothers were different according to  
14  
15  
16 81 subgroups of mother's dyslipidemia or obesity.  
17

18 82 ▶ This is a cross-sectional study, thus there was no causal relationship. The nutritional  
19  
20  
21 83 factors that can be significant confounding factors were not considered in the analyses.  
22

23 84

24 85

25 86

26 87

27 88

28 89

29 90

30 91

31 92

32 93

33 94

34 95

35 96

36 97

37 98  
38  
39  
40  
41  
42  
43  
44  
45  
46  
47  
48  
49  
50  
51  
52  
53  
54  
55  
56  
57  
58  
59  
60

## 99 INTRODUCTION

100 Dyslipidemia is a well-known risk factor for cardiovascular disease (CVD) in individuals of  
101 all ages.<sup>1</sup> In Korea, CVD is the second-leading cause of death after cancer.<sup>2</sup> Triglyceride (TG)  
102 and high-density lipoprotein cholesterol (HDL-C) are major components of metabolic  
103 syndrome (MetS). Likewise, the TG to HDL-C ratio, a predictor for small dense low-density  
104 lipoprotein cholesterol (LDL-C), is an independent determinant of arterial stiffness in  
105 adolescents and young adult,<sup>3</sup> which can subsequently accelerate atherosclerosis and increase  
106 cardiovascular events in the second decade of life.<sup>4</sup> Meanwhile, lipid level is strongly linked  
107 to the body mass index (BMI), which is one of the reliable indicators for obesity in  
108 adolescents.<sup>5</sup> Pediatric obesity is affected by various family settings such as eating habits,  
109 lifestyle, and education.<sup>6</sup> The prevalence of pediatric obesity in Korea has been increased  
110 rapidly from 5.8% in 1997 to 11.5% in 201,<sup>7</sup> which is close to the 13.3% in the United  
111 States.<sup>8</sup> This has increased interest in obesity-related disorders in adolescence, such as  
112 metabolic, cardiovascular, or psychosocial complication.<sup>9</sup> Obesity and dyslipidemia is no  
113 longer the problem of adults alone, therefore, adequate screening and control of dyslipidemia  
114 in adolescence has become important in Korea.

115  
116 In addition to obesity, various factors such as physical activity, economic status, education  
117 level, nutritional and dietary factors, sleep duration, and psychiatric problems, among others,  
118 have been associated with lipid concentration.<sup>10-12</sup> Meanwhile, family histories usually  
119 provide important information regarding pediatric diseases.<sup>13</sup> Regarding the highly heritable  
120 traits of dyslipidemia, several studies showed that there was a close relationship in the lipid  
121 concentration between parents and their offspring.<sup>14-16</sup> This familial clustering implies that  
122 there may be common denominators including health behavioral factors within a family as  
123 well as genetic backgrounds. In the present study, we investigated clinical and health

1  
2  
3 124 behavioral factors affecting adolescents' lipid levels, and evaluated the association between  
4  
5 125 the lipid profiles of adolescents and their mothers.  
6  
7 126

## 9 127 **METHODS**

### 11 128 **Data source**

12 129 This is a cross-sectional study using a secondary data of the Korea National Health and  
13  
14 130 Nutrition Examination Survey (KNHANES). KNHANES is an ongoing surveillance system  
15  
16 131 conducted by Korea Centers for Disease Control and Prevention (KCDC) since 1998 that  
17  
18 132 assesses health and nutrition status, and monitors health risk factors and the prevalence of  
19  
20 133 chronic diseases.<sup>17</sup> A special survey team visits four regions every week (192 regions per year)  
21  
22 134 and conducts a health examination, health interview, and nutrition survey. Among 59,015  
23  
24 135 individuals who were surveyed in KNHANES between 2009 and 2015, we selected 4,148  
25  
26 136 adolescents aged 12–18 years with available lipid profile data. Next, we obtained data for the  
27  
28 137 mothers of these adolescents during the same survey period by matching household  
29  
30 138 identification numbers. After the exclusion of 1,264 individuals with missing information  
31  
32 139 about adolescent's or mother's baseline characteristics or clinical findings, 2,884 adolescents  
33  
34 140 were eligible for the study (Figure 1). Use of the data from KNHANES was approved by the  
35  
36 141 Institutional Review Board of the KCDC (2009-01CON-03-2C, 2010-02CON-21-C, 2011-  
37  
38 142 02CON-06-C, 2012-01EXP-01-2C, 2013-07CON-03-4C, and 2013-12EXP-03-5C). This  
39  
40 143 survey has been available for use without approval since 2015.  
41  
42  
43  
44  
45  
46  
47  
48

### 49 145 **Outcome variables and health behavioral factors**

50 146 Both adolescent's and mother's lipid profiles consisted of total cholesterol (TC), TG, HDL-C,  
51  
52 147 and LDL-C. Outcome variables in the study were adolescents' lipid levels. Mothers' lipid  
53  
54 148 levels, which represent genetic linkage, were interesting variables. In order to examine their  
55  
56



1  
2  
3 149 relationship, we adjusted various clinical and health behavioral factors of both adolescents  
4  
5 150 and mothers. The level of LDL-C was calculated using the Friedewald equation. If the TG  
6  
7 151 level was 400 mg/dL or more, measurement of LDL-C was performed by using the  
8  
9 152 immunochemical method. Adolescents were divided into two age groups based on whether  
10  
11 153 they were high school students. In terms of obesity, we divided the study subjects into two  
12  
13 154 groups using an 85% cut-off of the body mass index (BMI) based on the age groups and sex  
14  
15  
16 155 for adolescents, and divided into three groups ( $<23$ ,  $23\text{--}24.9$ ,  $\geq 25$  kg/m<sup>2</sup>) for mothers.<sup>18 19</sup>

17  
18  
19 156 The values of fasting glucose were also divided into two groups based on the level of  
20  
21 157 impaired fasting glucose ( $\geq 100$  mg/dL). Degree of stress was divided into three groups based  
22  
23  
24 158 on individuals' perception. In addition, frequency of eating out, walking, and exercise per  
25  
26 159 week were investigated for adolescent health behaviors.

27  
28  
29 160 For mothers' variables, we used data regarding smoking and alcohol habits, degree of  
30  
31 161 education and family income, economic activity, and frequency of eating out per week.  
32  
33 162 Mother's dyslipidemia was defined based on TC level of 240 mg/dL or more, and included  
34  
35 163 cases of individuals diagnosed or treated with dyslipidemia even if the TC level was normal.

36  
37 164

### 38 39 165 **Statistical methods**

40  
41 166 Lipid profiles were analyzed as continuous variables with mean and standard deviation (SD)  
42  
43 167 in both adolescents and their mothers. Independent sample *t*-tests or one-way analysis of  
44  
45 168 variances (ANOVA) were used for categorical independent variables to analyze the  
46  
47 169 relationship with adolescents' lipid levels. The correlation of lipid levels between adolescents  
48  
49 170 and their mothers was analyzed using Pearson correlation (*r*) with 95% confidence interval  
50  
51 171 (CI). The *r* values were interpreted as slight ( $>0\text{--}0.2$ ), fair ( $>0.2\text{--}0.4$ ), moderate ( $>0.4\text{--}0.6$ ),  
52  
53 172 substantial ( $>0.6\text{--}0.8$ ), and almost perfect ( $>0.8$ ). Next, multiple linear regressions with  
54  
55

1  
2  
3 173 parameter estimates (beta coefficients) were performed to identify an amount change in  
4  
5 174 adolescents' lipid levels by each unit increase of their mothers' lipids. The regression models  
6  
7 175 included clinical characteristics and health behavioral factors of both adolescents and mothers.  
8  
9 176 In order to find the most adequate model fits among 16 possible combinations between four  
10  
11 177 adolescents' and their mothers' lipid profiles, we calculated adjusted R squared values, which  
12  
13 178 represent the explanatory power of the model. Lastly, the beta coefficients were also  
14  
15 179 determined in the subgroups by sex and mother's characteristics (age group, BMI, degree of  
16  
17 180 education, economic activity, and presence or absence of dyslipidemia) using multiple linear  
18  
19 181 regression. All 2-sided *P* values <0.05 were considered significant. Statistical analyses were  
20  
21 182 performed using SAS version 9.4 (SAS Institute, Cary, NC, USA).  
22  
23  
24  
25

#### 26 184 **Patient and public involvement**

27  
28 185 This study is a population-based survey study. Patients and public were not involved.  
29  
30  
31 186

## 32 33 187 **RESULTS**

34  
35 188 Table 1 shows baseline characteristics and their associations with adolescent lipid levels. The  
36  
37 189 mean age of the study population was  $14.7 \pm 1.9$  years (range, 12–18 years), and 52.8% of the  
38  
39 190 adolescents were male. A total of 9.3% of the individuals were overweight. The mean levels  
40  
41 191 (ranges) of adolescents' lipids were  $156.6 \pm 27.0$  (82–350),  $83.6 \pm 46.4$  (15–602),  $50.4 \pm 9.8$   
42  
43 192 (22–96), and  $89.4 \pm 23.3$  mg/dL (9–296), respectively, for TC, TG, HDL-C, and LDL-C.  
44  
45 193 HDL-C level was decreased in the older age group ( $P=0.023$ ). While TC, HDL-C, and LDL-  
46  
47 194 C levels were significantly higher in female adolescents than in their male counterparts, TG  
48  
49 195 was not different by sex. Individuals with increased BMI showed higher TC, TG, and LDL-C  
50  
51 196 levels, and lower HDL-C levels compared with those within the normal percentile range for  
52  
53 197 BMI. The frequency of eating out was inversely associated with TC level ( $P=0.027$ ), while  
54  
55  
56  
57  
58  
59  
60

1  
2  
3 198 increased frequency of walking was associated with decreased TC and LDL-C levels  
4  
5 199 ( $P=0.005$  and  $P=0.009$ , respectively). TG level was increased in the adolescents whose  
6  
7 200 mothers were obese ( $BMI \geq 25 \text{ kg/m}^2$ ), while the level of HDL-C was inversely associated  
8  
9  
10 201 with the mother's BMI and increasing age. Other health behaviors of the mothers' did not  
11  
12 202 show any significant associations with their adolescents' lipid levels.  
13  
14  
15 203

16  
17 204 Adolescent TC level demonstrated a fair positive correlation with mother's TC level ( $r =$   
18  
19 205  $0.257$  [95% confidence interval (CI),  $0.223-0.291$ ]) (Supplementary Figure S1). TG, HDL-C,  
20  
21 206 and LDL-C levels also had fair positive correlations between adolescents and their mothers,  
22  
23 207 yielding  $r = 0.200$  [95% CI,  $0.164-0.235$ ],  $r = 0.275$  [95% CI,  $0.241-0.308$ ], and  $r = 0.274$   
24  
25 208 [95% CI,  $0.240-0.307$ ], respectively. For reference, the correlations among the four  
26  
27 209 adolescent lipid profiles demonstrated an almost perfect correlation between the TC and  
28  
29 210 LDL-C levels ( $r = 0.918$  [95% CI,  $0.913-0.924$ ]), and showed a significant negative  
30  
31 211 correlation between HDL-C and TG ( $r = -0.345$  [95% CI,  $-0.376-0.312$ ]).  
32  
33

34 212  
35  
36 213 Based on the adjusted R squared values, the four most adequate regression models were  
37  
38 214 selected (Supplementary Table S1). Table 2 displays the multiple linear regressions of the  
39  
40 215 four adequate models. Adolescent TC increased by  $0.23 \text{ mg/dL}$  on average as their mothers'  
41  
42 216 TC increased by  $1 \text{ mg/dL}$ . The beta coefficients were  $0.16$ ,  $0.24$ , and  $0.24$ , respectively, in  
43  
44 217 each model of TG, HDL-C, and LDL-C. TC increased by  $13.32 \text{ mg/dL}$  in the female  
45  
46 218 adolescents compared with their male counterparts; other lipid parameters except for TG  
47  
48 219 were also higher in female adolescents compared with their male counterparts. BMI had a  
49  
50 220 positive association with the levels of TC, TG, and LDL-C, while HDL-C was negatively  
51  
52 221 associated with BMI. The frequency of eating out and walking tended to be inversely  
53  
54  
55  
56  
57  
58  
59  
60

1  
2  
3 222 associated with TC and LDL-C. Exercise more than 3 days per week was associated with  
4  
5 223 increased TC and LDL-C levels compared with no exercise. With regard to mother's  
6  
7 224 variables, overall adolescents' lipid levels tended to decrease as their mothers' age increased,  
8  
9 225 and other lipids apart from HDL-C tended to decrease when the mother's BMI increased.  
10  
11 226 Increased mothers' alcohol consumption was also significantly associated with decreased  
12  
13 227 adolescents' HDL-C. Mothers' education, working hours, frequency of eating out, and family  
14  
15 228 income did not affect adolescent lipid levels.  
16  
17

18 229

19  
20 230 Figure 2 represents the amount change in adolescents' lipid levels with each unit increase of  
21  
22 231 mothers' lipids in the subgroups. In most subgroups, there were significant positive  
23  
24 232 relationships between lipids in adolescents and mothers, with the exception of subgroups with  
25  
26 233 relatively small sample sizes (Table 3). The beta coefficients of TC, HDL-C, and LDL-C  
27  
28 234 were high in female adolescents compared with their male counterparts, whereas that of TG  
29  
30 235 was more prominent in the male adolescents. The beta coefficient was high in adolescents  
31  
32 236 whose mothers were not obese compared to those with obese mothers. In addition, the beta  
33  
34 237 coefficient for TC was higher in adolescents with non-dyslipidemic mothers than in those  
35  
36 238 with dyslipidemic mothers (0.259 vs. 0.121). The difference in beta coefficients according to  
37  
38 239 mother's obesity or dyslipidemia was also found in other lipid profiles.  
39  
40

41 240

## 42 241 **DISCUSSIONS**

43  
44 242 There is significance in that our study analyzed linear relationships of TC, TG, HDL-C, and  
45  
46 243 LDL-C, respectively, with an amount change of adolescents' lipid levels for each unit  
47  
48 244 increase of their mothers' lipids. We adjusted for various health behavioral factors of  
49  
50 245 adolescents and their mothers, as well as using a large national database. Moreover, we found  
51  
52 246 that relationships between lipids of adolescents and their mothers were different according to  
53  
54  
55  
56

1  
2  
3 247 subgroups of mother's dyslipidemia or obesity.  
4  
5 248  
6  
7 249 Atherosclerosis is triggered by childhood obesity associated with lipid abnormalities, rather  
8  
9 250 than obesity itself.<sup>20</sup> The prevalence of dyslipidemia was 6.5% in Korea by the cut-off of  
10  
11 251 National Cholesterol Education Program (NECP) and American Heart Association (AHA)  
12  
13 252 guidelines.<sup>21</sup> Meanwhile, the most frequent components among five MetS criteria in  
14  
15 253 adolescence were high TG (21.2%) and low HDL-C (13.6%).<sup>22</sup> When cut-off values of a  
16  
17 254 recent guideline were applied to our data,<sup>23</sup> the percentages of abnormal TC ( $\geq 200$  mg/dL),  
18  
19  
20  
21 255 TG ( $\geq 130$  mg/dL), HDL-C ( $< 40$  mg/dL), and LDL-C ( $\geq 130$  mg/dL) were 6.6%, 11.9%,  
22  
23  
24 256 13.3%, and 5.0%, respectively. Atherogenic dyslipidemia, characterized by the combination  
25  
26 257 of high TG and small dense LDL-C, and low HDL-C, was a common form of dyslipidemia in  
27  
28 258 young individuals (aged, 2–18 years) and had a strong familial aggregation.<sup>24</sup> Even taking  
29  
30  
31 259 into consideration the argument that a higher cut-off level of TG ( $\geq 150$  mg/dL) is appropriate  
32  
33  
34 260 for Korean adolescents,<sup>25</sup> the rate of high TG observed in the present study was 7.7%. That is,  
35  
36 261 our data showed a more considerable proportion of abnormal TG and HDL-C in adolescents  
37  
38 262 compared to other lipid parameters. Thus, the present study provides further evidence that  
39  
40 263 dyslipidemia especially atherogenic dyslipidemia is a big problem in Korean adolescents,  
41  
42 264 with the concern that it leads to CVD during the remainder of the lifespan.  
43  
44  
45 265

46  
47 266 It has been reported that dyslipidemia was associated with increased odds of dyslipidemia in  
48  
49 267 first-degree relatives (OR = 2.2).<sup>26</sup> This familial clustering is in turn caused by both genetic  
50  
51 268 backgrounds and shared environmental factors within a family. A previous study found that  
52  
53 269 genes contribute more than environment to familial correlation of lipids and obesity.<sup>15</sup> In this  
54  
55  
56  
57  
58  
59  
60

1  
2  
3 270 regard, numerous genetic determinants regulating lipid concentrations has been  
4  
5 271 investigated.<sup>27</sup> In addition, an animal study demonstrated that maternal dyslipidemia affected  
6  
7 272 offspring's lipid levels by activation of endogenous cholesterol synthesis.<sup>28</sup> Whatever the  
8  
9 273 cause or, a family history must be a major risk factor for adolescent's dyslipidemia.  
10  
11 274 Meanwhile, even in the subgroup of mothers who had normal TC levels and had never been  
12  
13 275 diagnosed with dyslipidemia, the positive relationships in lipids between the adolescents and  
14  
15 276 their mothers were significant for all lipid parameters. These findings may reflect  
16  
17 277 environmental impacts such as healthy diet, exercise habits, and efforts to improve lifestyles  
18  
19 278 within families, rather than just a hereditary influence. Of course, there may also be an impact  
20  
21 279 from other genetic factors such as diabetes or hypertension in first-degree relatives.<sup>26</sup>  
22  
23 280 Interestingly, the beta coefficient was prominent in adolescents with non-obese mothers  
24  
25 281 compared to those with obese mothers. It is possible that the genetic background of non-  
26  
27 282 obese dyslipidemic mothers affected the lipid levels of their offspring. However, the mean  
28  
29 283 BMI of dyslipidemic mothers was higher than that of non-dyslipidemic mothers (24.7 kg/m<sup>2</sup>  
30  
31 284 vs. 23.2 kg/m<sup>2</sup>). Moreover, the beta coefficient was also prominent in adolescents with non-  
32  
33 285 dyslipidemic mothers compared to those with dyslipidemic mothers. Thus, it is more likely  
34  
35 286 that the mothers' perception regarding dyslipidemia influences the adolescents' lipid levels.  
36  
37 287 Awareness of dyslipidemia was relatively low despite its higher prevalence worldwide.<sup>29</sup> A  
38  
39 288 mother's perception of lipid levels could affect her children's lipids through efforts related to  
40  
41 289 lifestyle and diet changes.<sup>30</sup> A recent Korean study highlighted education and counseling in  
42  
43 290 order to change health behavior in addition to awareness of dyslipidemia.<sup>31</sup> Our results from  
44  
45 291 subgroup analyses support these previous studies and highlight the influence of the mother's  
46  
47 292 perception of dyslipidemia and resultant lifestyle changes.  
48  
49 293  
50  
51 294 There is no doubt that lifestyle modification plays a central role in lipid control. Moreover,  
52  
53  
54  
55  
56  
57  
58  
59  
60

1  
2  
3 295 considering the high rates of abnormal TG and HDL-C and the restricted indications of lipid-  
4  
5 296 lowering agents in youth, lifestyle changes should play a larger role in adolescent patients.  
6  
7 297 Our results showed that frequent walking was negatively associated with TC and LDL-C  
8  
9 298 levels, which is predictable. Meanwhile, frequent eating out was associated with decreased  
10  
11 299 TC and LDL-C, a finding that conflicts with a general notion that eating out induces a high  
12  
13 300 calorie intake or overeating. Eating out was defined as all foods except home-cooked dishes  
14  
15 301 in this survey, then including school meals as well as dining out and delivery foods. Actually,  
16  
17 302 the frequency of eating out showed a great discrepancy between adolescents and mothers in  
18  
19 303 this study. Thus, school foods may compensate for negative effects of eating out by providing  
20  
21 304 regular and well-balanced meals. The positive correlation between exercise and lipid levels,  
22  
23 305 which is also an unexpected result, seems to be influenced by exercise intensity. Exercise  
24  
25 306 frequency alone was not sufficient to explain the effect of exercise adequately; thus, the  
26  
27 307 strength and duration of exercise should be considered. Our data regarding health behavioral  
28  
29 308 factors should be more detailed and concrete. However, it is certain that health behavioral  
30  
31 309 habits influence the lipid levels of adolescents, and therefore adolescents with dyslipidemia  
32  
33 310 and their families should be encouraged to improve their lifestyles.  
34  
35 311  
36  
37  
38  
39 312 Cholesterol levels in children and adolescents are highly dependent on age and sex.<sup>32</sup> Our  
40  
41 313 data showed that the levels of TC, LDL-C, and HDL-C were higher in female adolescents  
42  
43 314 than in males. In addition, the beta coefficients per unit increase of mother's TC, LDL-C, and  
44  
45 315 HDL-C were also prominent in females. It is possible that mothers with female offspring are  
46  
47 316 either more obese and dyslipidemic or otherwise. However, mother's mean BMI was similar  
48  
49 317 between male and female adolescents ( $23.3 \pm 3.2$  and  $23.5 \pm 3.3$  kg/m<sup>2</sup>, respectively,  $P=0.161$ );  
50  
51 318 furthermore, the rate of mother's dyslipidemia showed no statistical difference between male  
52  
53  
54  
55  
56  
57  
58  
59  
60

1  
2  
3 319 and female adolescents (10.8% vs. 9.8%, respectively,  $P=0.373$ ). Thus, the difference of beta  
4  
5 320 coefficient by sex may be due to a distinct difference in lipid levels by sex. This is supported  
6  
7 321 by our result that the TG level was higher in male than in female adolescents and the beta  
8  
9 322 coefficient of TG was also higher in male adolescents.

10  
11 323

12  
13 324 This study has several limitations. First, because it is a survey-based study, our data are  
14  
15 325 vulnerable to recall bias. Second, as it is a cross-sectional design, there was no causal  
16  
17 326 relationship. This factor will be particularly important in consideration of the impacts due to  
18  
19 327 environmental factors. Further well-designed cohort studies are warranted. Third, individuals  
20  
21 328 who responded to the national survey could have greater health concerns. They may have  
22  
23 329 better health behavioral habits, or family members with chronic diseases. However, this  
24  
25 330 survey was uniformly performed in all regions of Korea and targeted all age groups; thus, our  
26  
27 331 data can be considered nationally representative samples. Fourth, the nutritional factors,  
28  
29 332 which were not considered in the analyses because of insufficient information and large  
30  
31 333 missing values, can be significant confounding factors. Further studies based on detailed  
32  
33 334 surveys for health behavioral factors and nutritional elements are needed. Fifth, we did not  
34  
35 335 evaluate the father's lipid levels. If the father's lipid levels had also been considered, the  
36  
37 336 genetic backgrounds of lipids might be emphasized more. Finally, various comorbidities such  
38  
39 337 as hypothyroidism, Cushing's disease, liver disease, and nephrotic syndrome, among others,  
40  
41 338 as well as long-term use of steroid can affect lipid level,<sup>33</sup> and these could be also  
42  
43 339 confounding factors. However, these chronic diseases are extremely rare during the  
44  
45 340 adolescent period, and thus could be negligible.

46  
47 341

48  
49 342 In conclusion, a mother's lipid levels were positively associated with her adolescents' lipid  
50  
51 343 levels because of both genetic and environmental factors within the family. Adolescent



1  
2  
3 344 dyslipidemia creates a large risk factor burden for cardiovascular diseases; therefore, timely  
4  
5 345 screening for dyslipidemia is important, especially for indicated adolescents. Our positive  
6  
7 346 correlation between lipids of adolescents and their mothers supports that the mother's lipid  
8  
9 347 level is an appropriate reference for the screening of the adolescent's dyslipidemia. Moreover,  
10  
11 348 the mother's perception regarding dyslipidemia seems to have a positive effect on offspring  
12  
13 349 lipid control by affecting health behavioral factors.  
14  
15

16 350

17  
18 351 **Acknowledgements** The authors thank the participants for their cooperation and the staffs of  
19  
20 352 KNHANES (<https://knhanes.cdc.go.kr/knhanes/index.do>) for their hard work.  
21

22 353 **Contributors** E.C.P and S.I.J designed the study. J.H.N. and J.S. analyzed and interpreted the  
23  
24 354 data. J.H.N., J.K.L., and Y.J.L. drafted the manuscript. J.H.K. and K.T.H critically revised the  
25  
26 355 manuscript. All authors read and approved the final version.  
27

28  
29 356 **Funding** This work was not supported by any funding.  
30

31 357 **Competing interests** The authors declare no competing interest.  
32

33 358 **Participant consent** This nationwide survey is fully anonymized and does not require  
34  
35 359 informed consent.  
36

37 360 **Ethics approval** This study was analyzed using KNHANES secondary data. Use of the data  
38  
39 361 was approved by the Institutional Review Board of the KCDC.  
40

41 362 **Availability of data and material** All data analyzed during this study are available in the  
42  
43 363 KCDC and KNHANES repository, [[https://knhanes.cdc.go.kr/knhanes/sub03/sub03\\_01.do](https://knhanes.cdc.go.kr/knhanes/sub03/sub03_01.do)]  
44  
45 364

## 46 47 48 365 **REFERENCES**

49  
50  
51 366 1. Berenson GS, Srinivasan SR, Bao W, et al. Association between multiple  
52  
53 367 cardiovascular risk factors and atherosclerosis in children and young adults. The  
54  
55 368 Bogalusa Heart Study. N Engl J Med 1998;338:1650-6.  
56

- 1  
2  
3 369 2. Cause-of-death statistics in the Republic of Korea, 2014. *J Korean Med Assoc*  
4  
5 370 2016;59:221-32.
- 6  
7 371 3. Urbina EM, Khoury PR, McCoy CE, et al. Triglyceride to HDL-C ratio and increased  
8  
9 372 arterial stiffness in children, adolescents, and young adults. *Pediatrics*  
10  
11 373 2013;131:e1082-90.
- 12  
13 374 4. McGill HC, Jr., McMahan CA, Zieske AW, et al. Associations of coronary heart  
14  
15 375 disease risk factors with the intermediate lesion of atherosclerosis in youth. The  
16  
17 376 Pathobiological Determinants of Atherosclerosis in Youth (PDAY) Research Group.  
18  
19 377 *Arterioscler Thromb Vasc Biol* 2000;20:1998-2004.
- 20  
21  
22 378 5. Margolis KL, Greenspan LC, Trower NK, et al. Lipid screening in children and  
23  
24 379 adolescents in community practice: 2007 to 2010. *Circ Cardiovasc Qual Outcomes*  
25  
26 380 2014;7:718-26.
- 27  
28 381 6. Smetanina N, Albaviciute E, Babinska V, et al. Prevalence of overweight/obesity in  
29  
30 382 relation to dietary habits and lifestyle among 7-17 years old children and adolescents  
31  
32 383 in Lithuania. *BMC Public Health* 2015;15:1001.
- 33  
34 384 7. Korea Centers for Disease Control and Prevention. Korea Health Statistics 2014:  
35  
36 385 Korea National Health and Nutrition Examination Survey (KNHANES VI-2);  
37  
38 386 Ministry of Health and Welfare: Seoul, Korea. 2014.
- 39  
40 387 8. Ogden CL, Carroll MD, Curtin LR, et al. Prevalence of high body mass index in US  
41  
42 388 children and adolescents, 2007-2008. *JAMA* 2010;303:242-9.
- 43  
44 389 9. Ha KH, Kim DJ. Epidemiology of Childhood Obesity in Korea. *Endocrinol Metab*  
45  
46 390 (Seoul) 2016;31:510-8.
- 47  
48 391 10. Wang CJ, Li YQ, Wang L, et al. Development and evaluation of a simple and  
49  
50 392 effective prediction approach for identifying those at high risk of dyslipidemia in rural  
51  
52 393 adult residents. *PLoS One* 2012;7:e43834.

- 1  
2  
3 394 11. Danese A, Moffitt TE, Harrington H, et al. Adverse childhood experiences and adult  
4  
5 395 risk factors for age-related disease: depression, inflammation, and clustering of  
6  
7 396 metabolic risk markers. *Arch Pediatr Adolesc Med* 2009;163:1135-43.  
8  
9 397 12. Buitrago-Lopez A, van den Hooven EH, Rueda-Clausen CF, et al. Socioeconomic  
10  
11 398 status is positively associated with measures of adiposity and insulin resistance, but  
12  
13 399 inversely associated with dyslipidaemia in Colombian children. *J Epidemiol*  
14  
15 400 *Community Health* 2015;69:580-7.  
16  
17 401 13. Tarini BA, McInerney JD. Family history in primary care pediatrics. *Pediatrics*  
18  
19 402 2013;132:S203-10.  
20  
21 403 14. Kathiresan S, Manning AK, Demissie S, et al. A genome-wide association study for  
22  
23 404 blood lipid phenotypes in the Framingham Heart Study. *BMC Med Genet* 2007;8  
24  
25 405 Suppl 1:S17.  
26  
27 406 15. Hunt SC, Hasstedt SJ, Kuida H, et al. Genetic heritability and common environmental  
28  
29 407 components of resting and stressed blood pressures, lipids, and body mass index in  
30  
31 408 Utah pedigrees and twins. *Am J Epidemiol* 1989;129:625-38.  
32  
33 409 16. Predazzi IM, Sobota RS, Sanna S, et al. Sex-Specific Parental Effects on Offspring  
34  
35 410 Lipid Levels. *J Am Heart Assoc* 2015;4:e001951.  
36  
37 411 17. Kweon S, Kim Y, Jang MJ, et al. Data resource profile: the Korea National Health and  
38  
39 412 Nutrition Examination Survey (KNHANES). *Int J Epidemiol* 2014;43:69-77.  
40  
41 413 18. Park HW, Yoo HY, Kim CH, et al. Reference values of body composition indices: the  
42  
43 414 Korean National Health and Nutrition Examination Surveys. *Yonsei Med J*  
44  
45 415 2015;56:95-102.  
46  
47 416 19. Jee SH, Sull JW, Park J, et al. Body-mass index and mortality in Korean men and  
48  
49 417 women. *N Engl J Med* 2006;355:779-87.  
50  
51 418 20. D'Adamo E, Guardamagna O, Chiarelli F, et al. Atherogenic dyslipidemia and  
52  
53  
54  
55  
56  
57  
58  
59  
60

- 1  
2  
3 419 cardiovascular risk factors in obese children. *Int J Endocrinol* 2015;2015:912047.
- 4  
5 420 21. Lim JS. The current state of dyslipidemia in Korean children and adolescents and its  
6  
7 421 management in clinical practice. *Ann Pediatr Endocrinol Metab* 2013;18:1-8.
- 8  
9 422 22. Kim S, So WY. Prevalence of Metabolic Syndrome among Korean Adolescents  
10  
11 423 According to the National Cholesterol Education Program, Adult Treatment Panel III  
12  
13 424 and International Diabetes Federation. *Nutrients* 2016;8:558.
- 14  
15 425 23. Expert Panel on Integrated Guidelines for Cardiovascular H, Risk Reduction in C,  
16  
17 426 Adolescents, National Heart L, Blood I. Expert panel on integrated guidelines for  
18  
19 427 cardiovascular health and risk reduction in children and adolescents: summary report.  
20  
21 428 *Pediatrics* 2011;128 Suppl 5:S213-56.
- 22  
23 429 24. Montali A, Truglio G, Martino F, et al. Atherogenic dyslipidemia in children:  
24  
25 430 evaluation of clinical, biochemical and genetic aspects. *PLoS One* 2015;10:e0120099.
- 26  
27 431 25. Yoon JM. Dyslipidemia in children and adolescents: when and how to diagnose and  
28  
29 432 treat? *Pediatr Gastroenterol Hepatol Nutr* 2014;17:85-92.
- 30  
31 433 26. Khoury M, Manlhiot C, Gibson D, et al. Universal screening for cardiovascular  
32  
33 434 disease risk factors in adolescents to identify high-risk families: a population-based  
34  
35 435 cross-sectional study. *BMC Pediatr* 2016;16:11.
- 36  
37 436 27. Calandra S, Tarugi P, Speedy HE, et al. Mechanisms and genetic determinants  
38  
39 437 regulating sterol absorption, circulating LDL levels, and sterol elimination:  
40  
41 438 implications for classification and disease risk. *J Lipid Res* 2011;52:1885-926.
- 42  
43 439 28. Goharkhay N, Tamayo EH, Yin H, et al. Maternal hypercholesterolemia leads to  
44  
45 440 activation of endogenous cholesterol synthesis in the offspring. *Am J Obstet Gynecol*  
46  
47 441 2008;199:273 e271-6.
- 48  
49 442 29. Zhang FL, Xing YQ, Wu YH, et al. The prevalence, awareness, treatment, and control  
50  
51 443 of dyslipidemia in northeast China: a population-based cross-sectional survey. *Lipids*

- 1  
2  
3 444 Health Dis 2017;16:61.  
4  
5 445 30. Price JH, Casler SM. African-American mothers' perceptions of cholesterol and its  
6  
7 446 effects on their children. J Natl Med Assoc 1996;88:145-50.  
8  
9 447 31. Cho IY, Park HY, Lee K, et al. Association Between the Awareness of Dyslipidemia  
10  
11 448 and Health Behavior for Control of Lipid Levels Among Korean Adults with  
12  
13 449 Dyslipidemia. Korean J Fam Med 2017;38:64-74.  
14  
15 450 32. Skinner AC, Steiner MJ, Chung AE, et al. Cholesterol curves to identify population  
16  
17 451 norms by age and sex in healthy weight children. Clin Pediatr (Phila) 2012;51:233-7.  
18  
19 452 33. Vodnala D, Rubenfire M, Brook RD. Secondary causes of dyslipidemia. Am J Cardiol  
20  
21 453 2012;110:823-5.  
22  
23  
24 454

## 25 26 27 455 **FIGURE LEGENDS**

28  
29 456 **Figure 1** Study flow showing sample selection. We selected 2,884 adolescents aged 12–18  
30  
31 457 whose mothers' data were also available.

32  
33 458 **Figure 2** Bar graphs showing standardized beta coefficients of adolescent's lipids for each  
34  
35 459 unit increase of their mother's lipids in subgroups. HDL-C, high-density lipoprotein  
36  
37 460 cholesterol; LDL-C, low-density lipoprotein cholesterol; TC, total cholesterol; TG,  
38  
39 461 triglyceride.  
40  
41  
42  
43  
44  
45  
46  
47  
48  
49  
50  
51  
52  
53  
54  
55  
56  
57  
58  
59  
60

**Table 1** Relationship between baseline characteristics and adolescent's lipid profiles

|                             | No. (%)     | TC    |      |                | TG    |      |                | HDL-C |      |                | LDL-C |      |                |
|-----------------------------|-------------|-------|------|----------------|-------|------|----------------|-------|------|----------------|-------|------|----------------|
|                             |             | Mean  | SD   | <i>P</i> value |
| All (n=2884)                |             | 156.6 | 27.0 |                | 83.6  | 46.4 |                | 50.4  | 9.8  |                | 89.4  | 23.3 |                |
| <b>Adolescent variables</b> |             |       |      |                |       |      |                |       |      |                |       |      |                |
| Age (years)                 |             |       |      | 0.509          |       |      | 0.631          |       |      | 0.023          |       |      | 0.718          |
| 12-14                       | 1454 (50.4) | 156.9 | 26.4 |                | 84.0  | 47.0 |                | 50.8  | 9.8  |                | 89.2  | 22.8 |                |
| 15-18                       | 1430 (49.6) | 156.2 | 27.6 |                | 83.1  | 45.8 |                | 50.0  | 9.8  |                | 89.6  | 23.8 |                |
| Sex                         |             |       |      | <.001          |       |      | 0.187          |       |      | <.001          |       |      | <.001          |
| Male                        | 1522 (52.8) | 151.4 | 27.1 |                | 84.6  | 49.7 |                | 48.7  | 9.6  |                | 85.9  | 23.5 |                |
| Female                      | 1362 (47.2) | 162.3 | 25.9 |                | 82.4  | 42.3 |                | 52.4  | 9.7  |                | 93.4  | 22.5 |                |
| BMI*                        |             |       |      | 0.020          |       |      | <.001          |       |      | <.001          |       |      | 0.001          |
| <85%                        | 2617 (90.7) | 156.1 | 26.6 |                | 81.0  | 44.6 |                | 51.1  | 9.7  |                | 88.9  | 22.9 |                |
| ≥85%                        | 267 (9.3)   | 160.7 | 30.7 |                | 109.1 | 55.5 |                | 44.2  | 8.0  |                | 94.6  | 26.3 |                |
| Glucose (mg/dl)             |             |       |      | 0.259          |       |      | 0.405          |       |      | 0.940          |       |      | 0.329          |
| ≤100                        | 2752 (95.4) | 156.4 | 26.8 |                | 83.4  | 46.2 |                | 50.4  | 9.8  |                | 89.3  | 23.1 |                |
| >100                        | 132 (4.6)   | 159.6 | 32.1 |                | 86.8  | 49.9 |                | 50.5  | 10.0 |                | 91.7  | 27.7 |                |
| Stress level                |             |       |      | 0.475          |       |      | 0.920          |       |      | 0.627          |       |      | 0.366          |
| Non                         | 476 (16.5)  | 156.9 | 28.3 |                | 82.8  | 43.9 |                | 50.1  | 9.6  |                | 90.2  | 24.6 |                |
| Mild                        | 1714 (59.4) | 156.9 | 26.8 |                | 83.7  | 45.7 |                | 50.6  | 9.9  |                | 89.6  | 23.3 |                |
| Moderate                    | 694 (24.1)  | 155.5 | 26.8 |                | 83.8  | 49.7 |                | 50.3  | 9.7  |                | 88.4  | 22.5 |                |
| Eating out/week             |             |       |      | 0.027          |       |      | 0.129          |       |      | 0.459          |       |      | 0.103          |
| ≥7                          | 1121 (38.9) | 154.8 | 26.3 |                | 81.0  | 40.4 |                | 50.1  | 9.7  |                | 88.4  | 22.9 |                |
| 5-6                         | 1676 (58.1) | 157.5 | 27.4 |                | 85.1  | 50.0 |                | 50.6  | 9.8  |                | 89.9  | 23.6 |                |
| 1-4                         | 66 (2.3)    | 159.3 | 25.6 |                | 85.6  | 44.9 |                | 50.4  | 10.5 |                | 91.6  | 21.0 |                |
| <1                          | 21 (0.7)    | 164.6 | 33.3 |                | 90.4  | 48.2 |                | 48.4  | 9.5  |                | 98.0  | 27.2 |                |
| Walking/week                |             |       |      | 0.005          |       |      | 0.839          |       |      | 0.474          |       |      | 0.009          |
| 0-1 day                     | 321 (11.1)  | 159.1 | 26.4 |                | 84.9  | 56.3 |                | 50.8  | 10.1 |                | 91.4  | 22.1 |                |
| 2-4 days                    | 502 (17.4)  | 157.9 | 27.0 |                | 84.4  | 44.6 |                | 50.1  | 9.5  |                | 90.8  | 23.7 |                |
| 5-6 days                    | 760 (26.4)  | 157.9 | 28.6 |                | 83.8  | 47.6 |                | 50.8  | 9.9  |                | 90.4  | 24.3 |                |
| 7 days                      | 1301 (45.1) | 154.6 | 26.2 |                | 82.8  | 43.6 |                | 50.2  | 9.8  |                | 87.8  | 22.7 |                |
| Exercise/week               |             |       |      | 0.140          |       |      | 0.403          |       |      | 0.012          |       |      | 0.543          |
| Non                         | 1846 (64.0) | 157.3 | 26.8 |                | 84.4  | 47.0 |                | 50.8  | 10.0 |                | 89.5  | 22.8 |                |
| 1-2days                     | 633 (22.0)  | 155.7 | 27.5 |                | 81.9  | 45.5 |                | 49.5  | 9.1  |                | 89.7  | 24.0 |                |
| ≥3days                      | 405 (14.0)  | 154.7 | 27.4 |                | 82.2  | 45.0 |                | 50.1  | 9.8  |                | 88.2  | 24.5 |                |
| <b>Mother variables</b>     |             |       |      |                |       |      |                |       |      |                |       |      |                |
| Age (years)                 |             |       |      | 0.103          |       |      | 0.548          |       |      | 0.017          |       |      | 0.482          |
| 30-39                       | 505 (17.5)  | 157.7 | 25.8 |                | 85.5  | 46.7 |                | 51.2  | 9.7  |                | 89.3  | 21.9 |                |
| 40-49                       | 2154 (74.7) | 156.7 | 27.4 |                | 83.3  | 46.7 |                | 50.4  | 9.9  |                | 89.6  | 23.7 |                |
| 50-59                       | 225 (7.8)   | 153.1 | 26.1 |                | 82.0  | 43.0 |                | 49.0  | 8.7  |                | 87.6  | 22.1 |                |
| BMI (kg/m <sup>2</sup> )    |             |       |      | 0.426          |       |      | 0.022          |       |      | 0.001          |       |      | 0.342          |

|    |                 |             |       |      |       |      |      |       |      |      |       |      |       |
|----|-----------------|-------------|-------|------|-------|------|------|-------|------|------|-------|------|-------|
| 1  |                 |             |       |      |       |      |      |       |      |      |       |      |       |
| 2  |                 |             |       |      |       |      |      |       |      |      |       |      |       |
| 3  |                 |             |       |      |       |      |      |       |      |      |       |      |       |
| 4  |                 |             |       |      |       |      |      |       |      |      |       |      |       |
| 5  | <23             | 1430 (49.6) | 156.6 | 26.4 |       | 82.2 | 42.9 |       | 51.1 | 9.7  |       | 89.0 | 22.3  |
| 6  | 23-24.9         | 684 (23.7)  | 155.6 | 26.7 |       | 81.9 | 44.6 |       | 50.1 | 9.7  |       | 89.1 | 23.2  |
| 7  | ≥25             | 770 (26.7)  | 157.4 | 28.5 |       | 87.6 | 53.4 |       | 49.5 | 10.0 |       | 90.5 | 25.1  |
| 8  | Smoking status  |             |       |      | 0.468 |      |      | 0.503 |      |      | 0.132 |      | 0.164 |
| 9  | Non             | 2648 (91.8) | 156.4 | 27.1 |       | 83.4 | 46.8 |       | 50.5 | 9.8  |       | 89.2 | 23.3  |
| 10 | Ex-             | 89 (3.1)    | 159.2 | 26.1 |       | 82.1 | 41.1 |       | 49.8 | 9.5  |       | 92.8 | 22.7  |
| 11 | Current         | 147 (5.1)   | 158.3 | 27.3 |       | 87.8 | 40.7 |       | 48.9 | 9.6  |       | 91.7 | 23.9  |
| 12 | Drinking status |             |       |      | 0.410 |      |      | 0.632 |      |      | 0.378 |      | 0.140 |
| 13 | Non             | 718 (24.9)  | 155.4 | 27.0 |       | 82.7 | 47.5 |       | 50.8 | 9.8  |       | 88.0 | 23.1  |
| 14 | ≤1/month        | 1250 (43.3) | 157.0 | 27.2 |       | 83.2 | 46.3 |       | 50.2 | 9.7  |       | 90.2 | 23.6  |
| 15 | ≥2/month        | 916 (31.8)  | 156.8 | 26.9 |       | 84.8 | 45.6 |       | 50.4 | 9.9  |       | 89.4 | 23.0  |
| 16 | Education level |             |       |      | 0.767 |      |      | 0.098 |      |      | 0.490 |      | 0.847 |
| 17 | Elementary      | 96 (3.3)    | 155.5 | 27.5 |       | 84.9 | 47.5 |       | 49.8 | 9.8  |       | 88.7 | 24.9  |
| 18 | Middle          | 177 (6.1)   | 157.1 | 28.5 |       | 84.5 | 46.0 |       | 49.9 | 8.8  |       | 90.3 | 24.6  |
| 19 | High            | 1624 (56.3) | 157.0 | 27.6 |       | 85.2 | 48.6 |       | 50.3 | 9.9  |       | 89.6 | 23.9  |
| 20 | University      | 987 (34.2)  | 155.9 | 25.8 |       | 80.6 | 42.3 |       | 50.8 | 9.7  |       | 89.0 | 21.8  |
| 21 | Income (1,000)  |             |       |      | 0.207 |      |      | 0.454 |      |      | 0.282 |      | 0.282 |
| 22 | <1,000          | 219 (7.6)   | 157.9 | 28.6 |       | 87.9 | 49.3 |       | 50.0 | 9.5  |       | 90.2 | 24.6  |
| 23 | 1,000-1,999     | 696 (24.1)  | 154.7 | 24.7 |       | 84.2 | 50.9 |       | 49.9 | 9.5  |       | 88.0 | 21.3  |
| 24 | 2,000-2,999     | 976 (33.8)  | 156.9 | 27.2 |       | 83.3 | 45.3 |       | 50.8 | 9.8  |       | 89.5 | 23.7  |
| 25 | ≥3,000          | 993 (34.4)  | 157.3 | 28.1 |       | 82.4 | 43.4 |       | 50.6 | 10.1 |       | 90.2 | 23.9  |
| 26 | Working hours   |             |       |      | 0.968 |      |      | 0.882 |      |      | 0.793 |      | 0.900 |
| 27 | Non             | 1679 (58.2) | 156.5 | 26.4 |       | 83.2 | 46.4 |       | 50.3 | 9.8  |       | 89.6 | 22.7  |
| 28 | Full-time       | 906 (31.4)  | 156.7 | 27.9 |       | 84.0 | 47.4 |       | 50.6 | 9.5  |       | 89.2 | 24.4  |
| 29 | Part time       | 299 (10.4)  | 156.3 | 27.9 |       | 84.3 | 42.9 |       | 50.3 | 10.5 |       | 89.0 | 23.2  |
| 30 | Eating out/week |             |       |      | 0.498 |      |      | 0.355 |      |      | 0.409 |      | 0.398 |
| 31 | ≥7              | 370 (12.8)  | 155.5 | 27.9 |       | 80.2 | 40.0 |       | 51.1 | 9.7  |       | 88.3 | 25.8  |
| 32 | 5-6             | 615 (21.3)  | 157.1 | 28.5 |       | 83.5 | 43.4 |       | 50.0 | 9.7  |       | 90.4 | 24.1  |
| 33 | 1-4             | 1278 (44.3) | 156.0 | 26.5 |       | 83.5 | 46.8 |       | 50.4 | 10.0 |       | 88.9 | 22.5  |
| 34 | <1              | 621 (21.5)  | 157.7 | 26.1 |       | 85.7 | 51.6 |       | 50.5 | 9.5  |       | 90.1 | 22.6  |

\*Based on body mass index (kg/m<sup>2</sup>) for age percentiles in male and female

BMI, body mass index; HDL-C, high-density lipoprotein cholesterol; LDL-C, low-density lipoprotein cholesterol; SD, standard deviation; TC, total cholesterol; TG, triglyceride.

**Table 2** Multivariate analyses of four regression models for adolescent and mother’s lipid profiles

|                                            | TC & TC |        |       |         | TG & TG |        |       |         | HDL-C & HDL-C |        |       |         | LDL-C & LDL-C |        |       |         |
|--------------------------------------------|---------|--------|-------|---------|---------|--------|-------|---------|---------------|--------|-------|---------|---------------|--------|-------|---------|
|                                            | β       | S.B.   | S.E.  | P value | β       | S.B.   | S.E.  | P value | β             | S.B.   | S.E.  | P value | β             | S.B.   | S.E.  | P value |
| <b>Mother lipids</b><br>(beta coefficient) | 0.229   | 0.268  | 0.015 | <.001   | 0.161   | 0.215  | 0.014 | <.001   | 0.240         | 0.294  | 0.015 | <.001   | 0.236         | 0.284  | 0.015 | <.001   |
| <b>Adolescent variables</b>                |         |        |       |         |         |        |       |         |               |        |       |         |               |        |       |         |
| Age (years)                                |         |        |       |         |         |        |       |         |               |        |       |         |               |        |       |         |
| 12-14                                      | Ref     |        |       |         | Ref     |        |       |         | Ref           |        |       |         | Ref           |        |       |         |
| 15-18                                      | -0.168  | -0.003 | 1.066 | 0.875   | -0.788  | -0.009 | 1.885 | 0.676   | -0.476        | -0.024 | 0.382 | 0.213   | 0.539         | 0.012  | 0.920 | 0.558   |
| Sex                                        |         |        |       |         |         |        |       |         |               |        |       |         |               |        |       |         |
| Male                                       | Ref     |        |       |         | Ref     |        |       |         | Ref           |        |       |         | Ref           |        |       |         |
| Female                                     | 13.317  | 0.246  | 1.045 | <.001   | 1.767   | 0.019  | 1.849 | 0.339   | 2.936         | 0.150  | 0.375 | <.001   | 9.954         | 0.213  | 0.902 | <.001   |
| BMI (%)*                                   |         |        |       |         |         |        |       |         |               |        |       |         |               |        |       |         |
| <85                                        | Ref     |        |       |         | Ref     |        |       |         | Ref           |        |       |         | Ref           |        |       |         |
| ≥85                                        | 10.931  | 0.117  | 1.727 | <.001   | 29.963  | 0.187  | 3.056 | <.001   | -5.514        | -0.163 | 0.620 | <.001   | 10.299        | 0.128  | 1.491 | <.001   |
| Glucose (mg/dl)                            |         |        |       |         |         |        |       |         |               |        |       |         |               |        |       |         |
| ≤100                                       | Ref     |        |       |         | Ref     |        |       |         | Ref           |        |       |         | Ref           |        |       |         |
| >100                                       | 4.240   | 0.033  | 2.279 | 0.063   | 3.483   | 0.016  | 4.036 | 0.388   | 0.448         | 0.010  | 0.818 | 0.584   | 2.768         | 0.025  | 1.967 | 0.159   |
| Stress level                               |         |        |       |         |         |        |       |         |               |        |       |         |               |        |       |         |
| Non                                        | Ref     |        |       |         | Ref     |        |       |         | Ref           |        |       |         | Ref           |        |       |         |
| Mild                                       | -0.117  | -0.002 | 1.319 | 0.929   | 1.583   | 0.017  | 2.334 | 0.498   | 0.521         | 0.026  | 0.473 | 0.271   | -0.979        | -0.021 | 1.138 | 0.390   |
| Moderate                                   | -2.199  | -0.035 | 1.525 | 0.150   | 1.739   | 0.016  | 2.697 | 0.519   | 0.103         | 0.005  | 0.547 | 0.851   | -2.552        | -0.047 | 1.316 | 0.053   |
| Eating out/week                            |         |        |       |         |         |        |       |         |               |        |       |         |               |        |       |         |
| ≥7                                         | Ref     |        |       |         | Ref     |        |       |         | Ref           |        |       |         | Ref           |        |       |         |
| 5-6                                        | 2.599   | 0.047  | 1.037 | 0.012   | 2.939   | 0.031  | 1.835 | 0.109   | 0.107         | 0.005  | 0.372 | 0.773   | 2.030         | 0.043  | 0.896 | 0.024   |
| 1-4                                        | 2.142   | 0.012  | 3.231 | 0.508   | 3.127   | 0.010  | 5.715 | 0.584   | 0.036         | 0.001  | 1.159 | 0.976   | 1.397         | 0.009  | 2.789 | 0.617   |
| <1                                         | 8.908   | 0.028  | 5.653 | 0.115   | 6.660   | 0.012  | 9.998 | 0.505   | -0.848        | -0.007 | 2.028 | 0.676   | 8.283         | 0.030  | 4.879 | 0.090   |
| Walking/week                               |         |        |       |         |         |        |       |         |               |        |       |         |               |        |       |         |
| 0-1 day                                    | Ref     |        |       |         | Ref     |        |       |         | Ref           |        |       |         | Ref           |        |       |         |
| 2-4 days                                   | -1.422  | -0.020 | 1.821 | 0.435   | -0.919  | -0.008 | 3.222 | 0.775   | -0.371        | -0.014 | 0.653 | 0.570   | -0.864        | -0.014 | 1.572 | 0.582   |
| 5-6 days                                   | -1.349  | -0.022 | 1.699 | 0.427   | -1.070  | -0.010 | 3.004 | 0.722   | -0.092        | -0.004 | 0.610 | 0.880   | -1.119        | -0.021 | 1.466 | 0.445   |
| 7 days                                     | -3.466  | -0.064 | 1.598 | 0.030   | -2.035  | -0.022 | 2.827 | 0.472   | -0.021        | -0.001 | 0.574 | 0.970   | -3.143        | -0.067 | 1.380 | 0.023   |
| Exercise/week                              |         |        |       |         |         |        |       |         |               |        |       |         |               |        |       |         |
| Non                                        | Ref     |        |       |         | Ref     |        |       |         | Ref           |        |       |         | Ref           |        |       |         |
| 1-2days                                    | 1.528   | 0.023  | 1.199 | 0.203   | -2.743  | -0.024 | 2.122 | 0.196   | -0.374        | -0.016 | 0.430 | 0.385   | 2.361         | 0.042  | 1.035 | 0.023   |
| ≥3days                                     | 2.992   | 0.038  | 1.459 | 0.040   | -3.400  | -0.025 | 2.581 | 0.188   | 0.939         | 0.033  | 0.523 | 0.073   | 3.018         | 0.045  | 1.260 | 0.017   |
| <b>Mother variables</b>                    |         |        |       |         |         |        |       |         |               |        |       |         |               |        |       |         |
| Age (years)                                |         |        |       |         |         |        |       |         |               |        |       |         |               |        |       |         |
| 30-39                                      | Ref     |        |       |         | Ref     |        |       |         | Ref           |        |       |         | Ref           |        |       |         |



|    |                          |        |        |       |       |        |        |       |       |        |        |       |       |        |        |       |       |
|----|--------------------------|--------|--------|-------|-------|--------|--------|-------|-------|--------|--------|-------|-------|--------|--------|-------|-------|
| 1  |                          |        |        |       |       |        |        |       |       |        |        |       |       |        |        |       |       |
| 2  |                          |        |        |       |       |        |        |       |       |        |        |       |       |        |        |       |       |
| 3  |                          |        |        |       |       |        |        |       |       |        |        |       |       |        |        |       |       |
| 4  |                          |        |        |       |       |        |        |       |       |        |        |       |       |        |        |       |       |
| 5  | 40-49                    | -1.270 | -0.020 | 1.322 | 0.337 | -1.716 | -0.016 | 2.337 | 0.463 | -0.972 | -0.043 | 0.474 | 0.040 | 0.046  | 0.001  | 1.141 | 0.968 |
| 6  | 50-59                    | -6.554 | -0.065 | 2.211 | 0.003 | -6.270 | -0.036 | 3.897 | 0.108 | -2.071 | -0.057 | 0.789 | 0.009 | -3.230 | -0.037 | 1.904 | 0.090 |
| 7  | BMI (kg/m <sup>2</sup> ) |        |        |       |       |        |        |       |       |        |        |       |       |        |        |       |       |
| 8  | <23                      | Ref    |        |       |       |
| 9  | 23-24.9                  | -1.637 | -0.026 | 1.191 | 0.169 | -3.390 | -0.031 | 2.120 | 0.110 | 0.175  | 0.008  | 0.432 | 0.685 | -0.849 | -0.016 | 1.029 | 0.409 |
| 10 | ≥25                      | -2.467 | -0.040 | 1.173 | 0.035 | -4.209 | -0.040 | 2.153 | 0.051 | 0.612  | 0.028  | 0.431 | 0.156 | -1.513 | -0.029 | 1.011 | 0.135 |
| 11 | Smoking status           |        |        |       |       |        |        |       |       |        |        |       |       |        |        |       |       |
| 12 | Non                      | Ref    |        |       |       |
| 13 | Ex-Current               | 1.855  | 0.015  | 2.220 | 0.403 | -2.802 | -0.013 | 3.945 | 0.478 | -1.544 | -0.035 | 0.797 | 0.053 | 4.246  | 0.040  | 1.918 | 0.027 |
| 14 | Drinking status          | 1.614  | 0.010  | 2.774 | 0.561 | -3.711 | -0.014 | 4.904 | 0.449 | -1.431 | -0.025 | 0.996 | 0.151 | 3.601  | 0.027  | 2.393 | 0.133 |
| 15 | Non                      | Ref    |        |       |       |
| 16 | ≤1/month                 | 0.056  | 0.001  | 1.301 | 0.966 | 2.098  | 0.021  | 2.302 | 0.362 | -1.724 | -0.082 | 0.472 | 0.000 | 1.168  | 0.023  | 1.123 | 0.299 |
| 17 | ≥2/month                 | -0.014 | 0.000  | 1.205 | 0.991 | 0.417  | 0.004  | 2.130 | 0.845 | -0.928 | -0.047 | 0.432 | 0.032 | 0.757  | 0.016  | 1.040 | 0.467 |
| 18 | Education level          |        |        |       |       |        |        |       |       |        |        |       |       |        |        |       |       |
| 19 | Elementary               | Ref    |        |       |       |
| 20 | Middle                   | 1.689  | 0.015  | 3.272 | 0.606 | 1.770  | 0.009  | 5.787 | 0.760 | -0.154 | -0.004 | 1.174 | 0.895 | 1.228  | 0.013  | 2.825 | 0.664 |
| 21 | High                     | -0.329 | -0.006 | 2.829 | 0.907 | 1.296  | 0.014  | 5.000 | 0.796 | -0.414 | -0.021 | 1.014 | 0.684 | -0.355 | -0.008 | 2.442 | 0.885 |
| 22 | University               | -1.680 | -0.029 | 2.930 | 0.566 | -1.693 | -0.017 | 5.178 | 0.744 | -0.299 | -0.015 | 1.051 | 0.776 | -1.301 | -0.026 | 2.529 | 0.607 |
| 23 | Income (1,000\)          |        |        |       |       |        |        |       |       |        |        |       |       |        |        |       |       |
| 24 | <1,000                   | Ref    |        |       |       |
| 25 | 1,000-1,999              | -1.700 | -0.027 | 2.015 | 0.399 | -1.408 | -0.013 | 3.566 | 0.693 | -0.460 | -0.020 | 0.723 | 0.525 | -0.964 | -0.018 | 1.739 | 0.580 |
| 26 | 2,000-2,999              | 0.419  | 0.007  | 1.985 | 0.833 | -1.328 | -0.014 | 3.516 | 0.706 | 0.105  | 0.005  | 0.713 | 0.883 | 0.485  | 0.010  | 1.713 | 0.777 |
| 27 | ≥3,000                   | 0.821  | 0.014  | 2.024 | 0.685 | -1.818 | -0.019 | 3.585 | 0.612 | 0.076  | 0.004  | 0.727 | 0.917 | 0.994  | 0.020  | 1.747 | 0.570 |
| 28 | Working hours            |        |        |       |       |        |        |       |       |        |        |       |       |        |        |       |       |
| 29 | Non                      | Ref    |        |       |       |
| 30 | Full-time                | 0.834  | 0.014  | 1.175 | 0.478 | 3.312  | 0.033  | 2.079 | 0.111 | 0.206  | 0.010  | 0.422 | 0.626 | -0.150 | -0.003 | 1.015 | 0.883 |
| 31 | Part time                | 0.279  | 0.003  | 1.610 | 0.863 | 0.496  | 0.003  | 2.848 | 0.862 | 0.008  | 0.000  | 0.578 | 0.989 | 0.068  | 0.001  | 1.390 | 0.961 |
| 32 | Eating out/week          |        |        |       |       |        |        |       |       |        |        |       |       |        |        |       |       |
| 33 | ≥7                       | Ref    |        |       |       |
| 34 | 5-6                      | 1.637  | 0.025  | 1.684 | 0.331 | 3.492  | 0.031  | 2.977 | 0.241 | -0.868 | -0.036 | 0.604 | 0.151 | 1.868  | 0.033  | 1.453 | 0.199 |
| 35 | 1-4                      | 0.539  | 0.010  | 1.593 | 0.735 | 3.111  | 0.033  | 2.818 | 0.270 | -0.372 | -0.019 | 0.572 | 0.516 | 0.374  | 0.008  | 1.375 | 0.785 |
| 36 | <1                       | 1.652  | 0.025  | 1.771 | 0.351 | 4.206  | 0.037  | 3.134 | 0.180 | -0.119 | -0.005 | 0.636 | 0.851 | 1.088  | 0.019  | 1.528 | 0.477 |

\*Based on body mass index (kg/m<sup>2</sup>) for age percentiles in male and female  
 BMI, body mass index; HDL-C, high-density lipoprotein cholesterol; LDL-C, low-density lipoprotein cholesterol; SD, standard deviation; S.B., standardized beta; S.E., standard error; TC, total cholesterol; TG, triglyceride.

**Table 3** Subgroup analyses based on sex and mother characteristics

|                          |             | TC & TC   |       |       |                | TG & TG   |       |       |                | HDL-C & HDL-C |       |       |                | LDL-C & LDL-C |       |       |                |
|--------------------------|-------------|-----------|-------|-------|----------------|-----------|-------|-------|----------------|---------------|-------|-------|----------------|---------------|-------|-------|----------------|
|                          |             | $\beta^*$ | S.B.  | S.E.  | <i>P</i> value | $\beta^*$ | S.B.  | S.E.  | <i>P</i> value | $\beta^*$     | S.B.  | S.E.  | <i>P</i> value | $\beta^*$     | S.B.  | S.E.  | <i>P</i> value |
| Sex                      |             |           |       |       |                |           |       |       |                |               |       |       |                |               |       |       |                |
| Male                     | 1522 (52.8) | 0.221     | 0.258 | 0.021 | <.001          | 0.199     | 0.245 | 0.021 | <.001          | 0.215         | 0.273 | 0.020 | <.001          | 0.228         | 0.274 | 0.021 | <.001          |
| Female                   | 1362 (47.2) | 0.244     | 0.299 | 1.510 | <.001          | 0.122     | 0.181 | 0.020 | <.001          | 0.271         | 0.331 | 0.022 | <.001          | 0.250         | 0.312 | 0.021 | <.001          |
| <b>Mother variables</b>  |             |           |       |       |                |           |       |       |                |               |       |       |                |               |       |       |                |
| Age (years)              |             |           |       |       |                |           |       |       |                |               |       |       |                |               |       |       |                |
| 30-39                    | 505 (17.5)  | 0.228     | 0.274 | 0.036 | <.001          | 0.150     | 0.186 | 0.040 | <.001          | 0.224         | 0.278 | 0.038 | <.001          | 0.247         | 0.315 | 0.035 | <.001          |
| 40-49                    | 2154 (74.7) | 0.239     | 0.273 | 0.018 | <.001          | 0.164     | 0.210 | 0.017 | <.001          | 0.250         | 0.302 | 0.018 | <.001          | 0.250         | 0.292 | 0.018 | <.001          |
| 50-59                    | 225 (7.8)   | 0.099     | 0.127 | 0.053 | 0.062          | 0.157     | 0.291 | 0.039 | <.001          | 0.207         | 0.287 | 0.051 | <.001          | 0.058         | 0.081 | 0.048 | 0.230          |
| BMI (kg/m <sup>2</sup> ) |             |           |       |       |                |           |       |       |                |               |       |       |                |               |       |       |                |
| <25                      | 2114 (73.3) | 0.249     | 0.288 | 0.018 | <.001          | 0.185     | 0.221 | 0.018 | <.001          | 0.250         | 0.313 | 0.017 | <.001          | 0.265         | 0.315 | 0.017 | <.001          |
| ≥25                      | 770 (26.7)  | 0.172     | 0.202 | 0.030 | <.001          | 0.129     | 0.183 | 0.025 | <.001          | 0.180         | 0.189 | 0.034 | <.001          | 0.168         | 0.203 | 0.030 | <.001          |
| Education level          |             |           |       |       |                |           |       |       |                |               |       |       |                |               |       |       |                |
| Elementary               | 96 (3.3)    | 0.154     | 0.185 | 0.111 | 0.171          | 0.212     | 0.287 | 0.105 | 0.047          | 0.056         | 0.064 | 0.110 | 0.616          | 0.136         | 0.185 | 0.098 | 0.171          |
| Middle                   | 177 (6.1)   | 0.222     | 0.240 | 0.073 | 0.003          | 0.241     | 0.055 | 0.379 | <.001          | 0.133         | 0.187 | 0.060 | 0.028          | 0.279         | 0.316 | 0.065 | <.001          |
| High                     | 1624 (56.3) | 0.226     | 0.264 | 0.021 | <.001          | 0.141     | 0.190 | 0.019 | <.001          | 0.257         | 0.314 | 0.020 | <.001          | 0.226         | 0.268 | 0.021 | <.001          |
| University               | 987 (34.2)  | 0.233     | 0.278 | 0.026 | <.001          | 0.174     | 0.209 | 0.028 | <.001          | 0.247         | 0.296 | 0.027 | <.001          | 0.253         | 0.314 | 0.025 | <.001          |
| Dyslipidemia†            |             |           |       |       |                |           |       |       |                |               |       |       |                |               |       |       |                |
| No                       | 2587 (89.7) | 0.259     | 0.257 | 0.019 | <.001          | 0.190     | 0.232 | 0.017 | <.001          | 0.255         | 0.305 | 0.016 | <.001          | 0.263         | 0.273 | 0.018 | <.001          |
| Yes                      | 297 (10.3)  | 0.121     | 0.182 | 0.040 | 0.003          | 0.096     | 0.189 | 0.032 | 0.003          | 0.151         | 0.222 | 0.045 | 0.001          | 0.137         | 0.224 | 0.035 | <.001          |
| Economic activity        |             |           |       |       |                |           |       |       |                |               |       |       |                |               |       |       |                |
| No                       | 1679 (58.2) | 0.202     | 0.240 | 0.020 | <.001          | 0.186     | 0.251 | 0.019 | <.001          | 0.258         | 0.325 | 0.019 | <.001          | 0.205         | 0.250 | 0.019 | <.001          |
| Yes                      | 1205 (41.8) | 0.267     | 0.308 | 0.024 | <.001          | 0.121     | 0.159 | 0.024 | <.001          | 0.214         | 0.251 | 0.025 | <.001          | 0.280         | 0.332 | 0.023 | <.001          |

The other covariates were adjusted for these regressions

\*An amount change in adolescents' lipid levels by each unit increase of their mothers' lipids

†Included cases diagnosed and/or treated with dyslipidemia, and cases with cholesterol level above 240mg/dl.

BMI, body mass index; HDL-C, high-density lipoprotein cholesterol; LDL-C, low-density lipoprotein cholesterol; SD, standard deviation; S.B., standardized beta; S.E., standard error; TC, total cholesterol; TG, triglyceride.

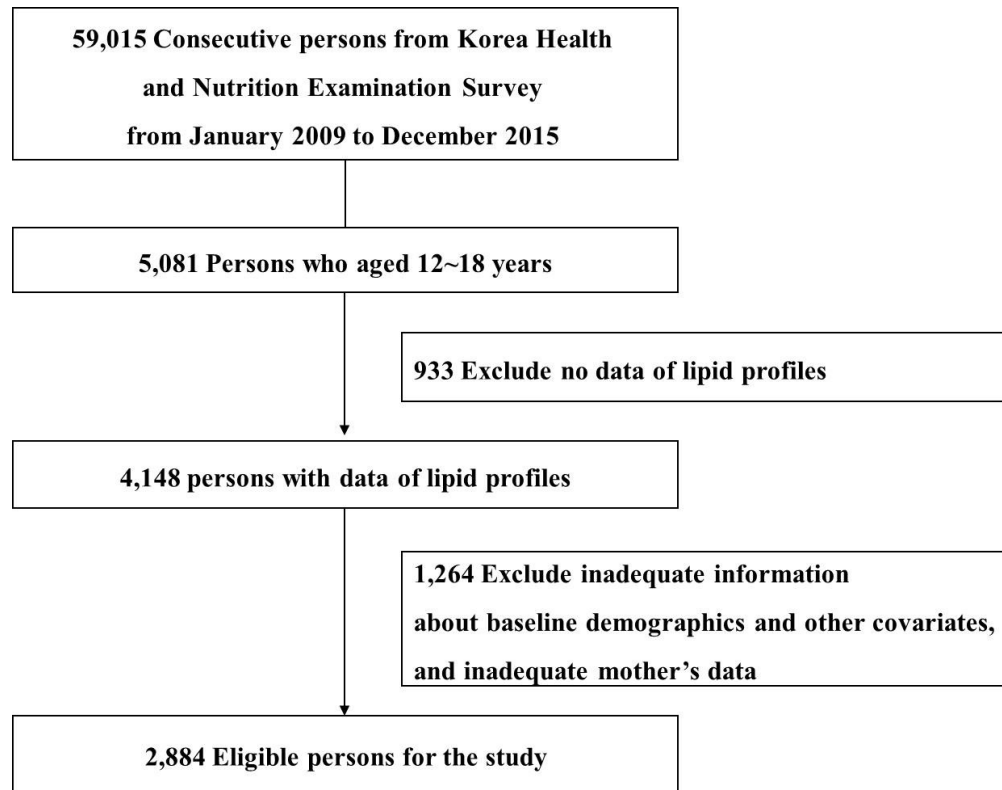

34 Figure 1 Study flow showing sample selection. We selected 2,884 adolescents aged 12–18 whose mothers'  
35 data were also available.

36  
37 104x90mm (300 x 300 DPI)

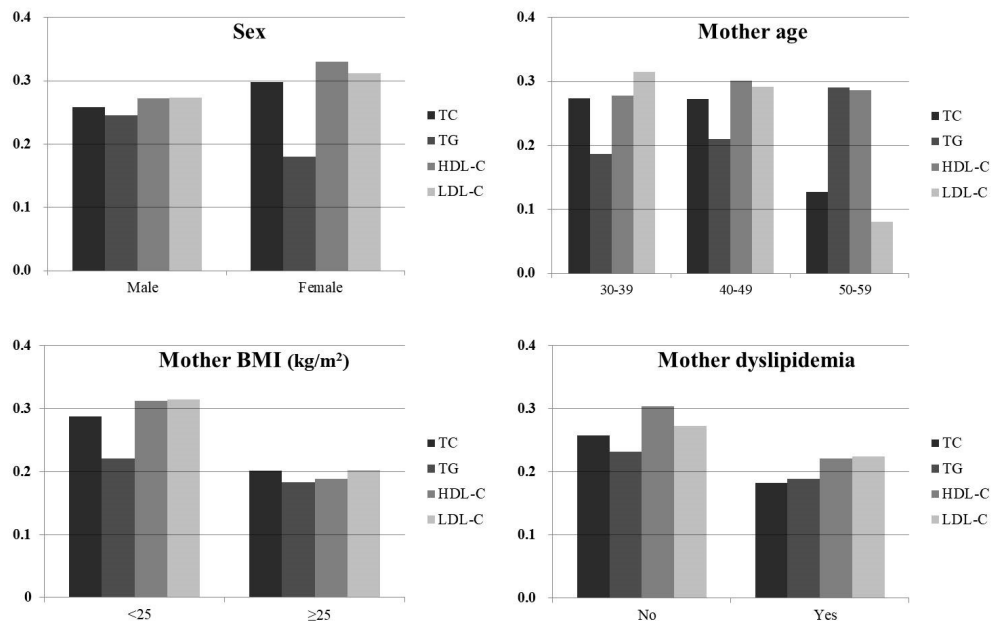

Figure 2 Bar graphs showing standardized beta coefficients of adolescent's lipids for each unit increase of their mother's lipids in subgroups. HDL-C, high-density lipoprotein cholesterol; LDL-C, low-density lipoprotein cholesterol; TC, total cholesterol; TG, triglyceride.

124x90mm (300 x 300 DPI)

TC

*P*<.0001

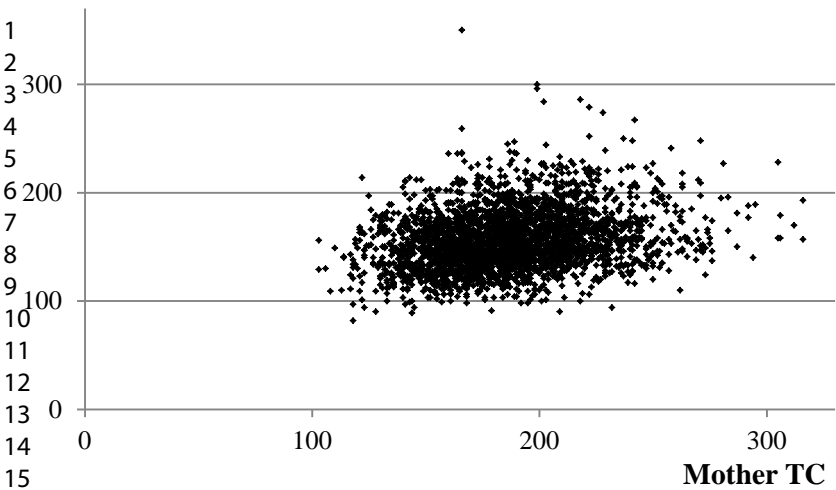

TG

*P*<.0001

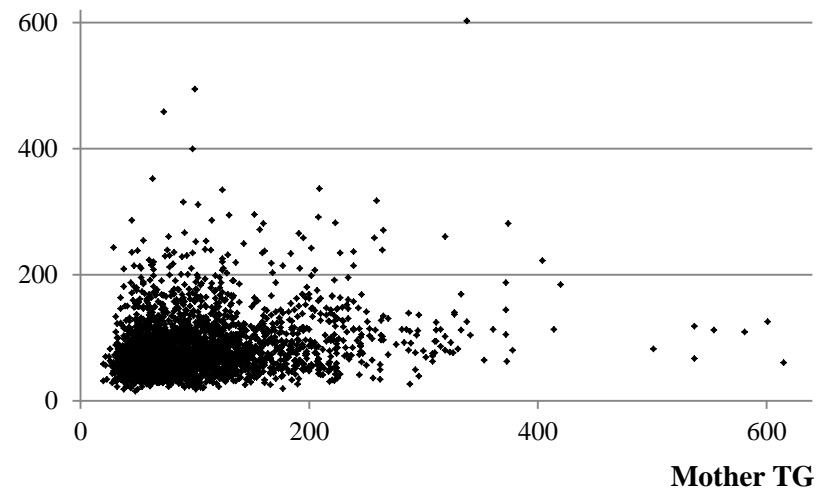

HDL-C

*P*<.0001

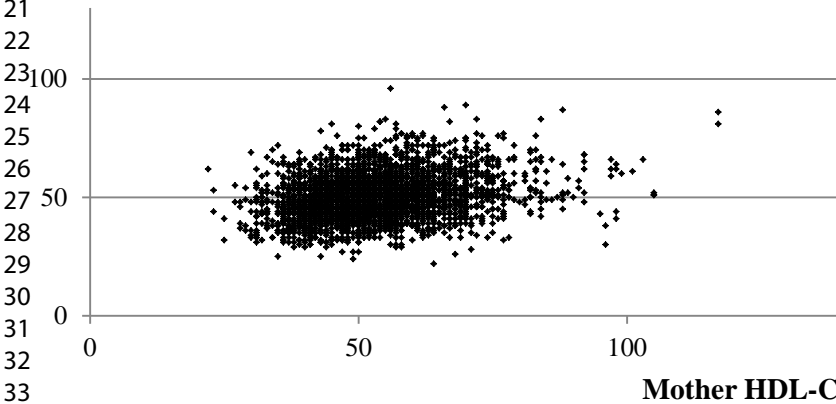

LDL-C

*P*<.0001

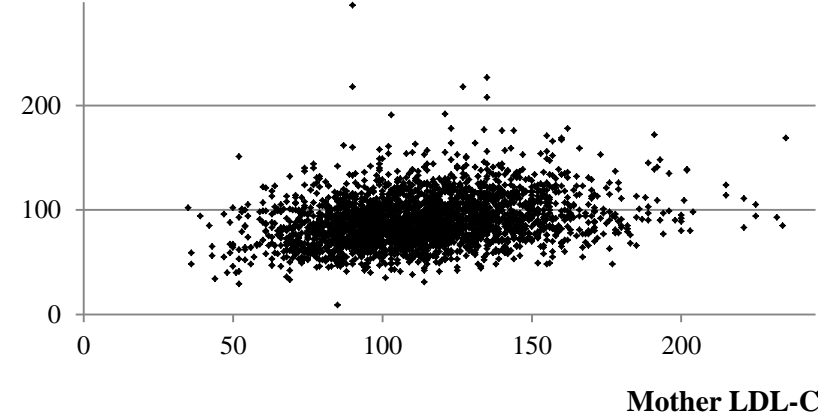

**Supplementary Figure S1** Dot plots of correlations between adolescent's and mother's lipids.  
 HDL-C, high-density lipoprotein cholesterol; LDL-C, low-density lipoprotein cholesterol; TC, total cholesterol; TG, triglyceride.

**Supplementary Table S1** Adjusted R squares for regression models of lipid profiles between adolescent and mother

| Adjusted R <sup>2</sup> |       | Adolescents   |               |               |               |
|-------------------------|-------|---------------|---------------|---------------|---------------|
|                         |       | TC            | TG            | HDL-C         | LDL-C         |
| Mothers                 | TC    | <b>0.1245</b> | 0.0296        | 0.0723        | 0.1095        |
|                         | TG    | 0.0585        | <b>0.0692</b> | 0.0678        | 0.0445        |
|                         | HDL-C | 0.0592        | 0.0424        | <b>0.1400</b> | 0.0442        |
|                         | LDL-C | 0.1164        | 0.0288        | 0.0640        | <b>0.1218</b> |

The other covariates were adjusted for these regressions.

HDL-C, high-density lipoprotein cholesterol; LDL-C, low-density lipoprotein cholesterol; TC, total cholesterol; TG, triglyceride.

**STROBE 2007 (v4) Statement—Checklist of items that should be included in reports of *cross-sectional studies***

| Section/Topic                | Item # | Recommendation                                                                                                                                                                       | Reported on page # |
|------------------------------|--------|--------------------------------------------------------------------------------------------------------------------------------------------------------------------------------------|--------------------|
| <b>Title and abstract</b>    | 1      | (a) Indicate the study’s design with a commonly used term in the title or the abstract                                                                                               | #1, #2             |
|                              |        | (b) Provide in the abstract an informative and balanced summary of what was done and what was found                                                                                  | #2, #3, #4         |
| <b>Introduction</b>          |        |                                                                                                                                                                                      |                    |
| Background/rationale         | 2      | Explain the scientific background and rationale for the investigation being reported                                                                                                 | #5                 |
| Objectives                   | 3      | State specific objectives, including any prespecified hypotheses                                                                                                                     | #6                 |
| <b>Methods</b>               |        |                                                                                                                                                                                      |                    |
| Study design                 | 4      | Present key elements of study design early in the paper                                                                                                                              | #6                 |
| Setting                      | 5      | Describe the setting, locations, and relevant dates, including periods of recruitment, exposure, follow-up, and data collection                                                      | #6, #7             |
| Participants                 | 6      | (a) Give the eligibility criteria, and the sources and methods of selection of participants                                                                                          | #6                 |
| Variables                    | 7      | Clearly define all outcomes, exposures, predictors, potential confounders, and effect modifiers. Give diagnostic criteria, if applicable                                             | #7                 |
| Data sources/<br>measurement | 8*     | For each variable of interest, give sources of data and details of methods of assessment (measurement). Describe comparability of assessment methods if there is more than one group | #7                 |
| Bias                         | 9      | Describe any efforts to address potential sources of bias                                                                                                                            | #7, #8             |
| Study size                   | 10     | Explain how the study size was arrived at                                                                                                                                            | #6                 |
| Quantitative variables       | 11     | Explain how quantitative variables were handled in the analyses. If applicable, describe which groupings were chosen and why                                                         | #7, #8             |
| Statistical methods          | 12     | (a) Describe all statistical methods, including those used to control for confounding                                                                                                | #7, #8             |
|                              |        | (b) Describe any methods used to examine subgroups and interactions                                                                                                                  | #8                 |
|                              |        | (c) Explain how missing data were addressed                                                                                                                                          | #6                 |
|                              |        | (d) If applicable, describe analytical methods taking account of sampling strategy                                                                                                   | Not applicable     |
|                              |        | (e) Describe any sensitivity analyses                                                                                                                                                | Not applicable     |
| <b>Results</b>               |        |                                                                                                                                                                                      |                    |

|                          |     |                                                                                                                                                                                                              |               |
|--------------------------|-----|--------------------------------------------------------------------------------------------------------------------------------------------------------------------------------------------------------------|---------------|
| Participants             | 13* | (a) Report numbers of individuals at each stage of study—eg numbers potentially eligible, examined for eligibility, confirmed eligible, included in the study, completing follow-up, and analysed            | #6            |
|                          |     | (b) Give reasons for non-participation at each stage                                                                                                                                                         | #6            |
|                          |     | (c) Consider use of a flow diagram                                                                                                                                                                           | #6            |
| Descriptive data         | 14* | (a) Give characteristics of study participants (eg demographic, clinical, social) and information on exposures and potential confounders                                                                     | #8, #9        |
|                          |     | (b) Indicate number of participants with missing data for each variable of interest                                                                                                                          | #6            |
| Outcome data             | 15* | Report numbers of outcome events or summary measures                                                                                                                                                         | #8            |
| Main results             | 16  | (a) Give unadjusted estimates and, if applicable, confounder-adjusted estimates and their precision (eg, 95% confidence interval). Make clear which confounders were adjusted for and why they were included | #8, #9, #10   |
|                          |     | (b) Report category boundaries when continuous variables were categorized                                                                                                                                    | #7            |
|                          |     | (c) If relevant, consider translating estimates of relative risk into absolute risk for a meaningful time period                                                                                             | #9, #10       |
| Other analyses           | 17  | Report other analyses done—eg analyses of subgroups and interactions, and sensitivity analyses                                                                                                               | #10           |
| <b>Discussion</b>        |     |                                                                                                                                                                                                              |               |
| Key results              | 18  | Summarise key results with reference to study objectives                                                                                                                                                     | #10           |
| Limitations              | 19  | Discuss limitations of the study, taking into account sources of potential bias or imprecision. Discuss both direction and magnitude of any potential bias                                                   | #14           |
| Interpretation           | 20  | Give a cautious overall interpretation of results considering objectives, limitations, multiplicity of analyses, results from similar studies, and other relevant evidence                                   | #11, #12, #13 |
| Generalisability         | 21  | Discuss the generalisability (external validity) of the study results                                                                                                                                        | #11           |
| <b>Other information</b> |     |                                                                                                                                                                                                              |               |
| Funding                  | 22  | Give the source of funding and the role of the funders for the present study and, if applicable, for the original study on which the present article is based                                                | #15           |

\*Give information separately for cases and controls in case-control studies and, if applicable, for exposed and unexposed groups in cohort and cross-sectional studies.

**Note:** An Explanation and Elaboration article discusses each checklist item and gives methodological background and published examples of transparent reporting. The STROBE checklist is best used in conjunction with this article (freely available on the Web sites of PLoS Medicine at <http://www.plosmedicine.org/>, Annals of Internal Medicine at <http://www.annals.org/>, and Epidemiology at <http://www.epidem.com/>). Information on the STROBE Initiative is available at [www.strobe-statement.org](http://www.strobe-statement.org).



# BMJ Open

## Associations between lipid profiles of adolescents and their mothers based on a nationwide health and nutrition survey in South Korea

|                                 |                                                                                                                                                                                                                                                                                                                                                                                                                                                                                                                                                                                                                                                                                                                                                                                                                                                                                                                                                                                  |
|---------------------------------|----------------------------------------------------------------------------------------------------------------------------------------------------------------------------------------------------------------------------------------------------------------------------------------------------------------------------------------------------------------------------------------------------------------------------------------------------------------------------------------------------------------------------------------------------------------------------------------------------------------------------------------------------------------------------------------------------------------------------------------------------------------------------------------------------------------------------------------------------------------------------------------------------------------------------------------------------------------------------------|
| Journal:                        | <i>BMJ Open</i>                                                                                                                                                                                                                                                                                                                                                                                                                                                                                                                                                                                                                                                                                                                                                                                                                                                                                                                                                                  |
| Manuscript ID                   | bmjopen-2018-024731.R1                                                                                                                                                                                                                                                                                                                                                                                                                                                                                                                                                                                                                                                                                                                                                                                                                                                                                                                                                           |
| Article Type:                   | Research                                                                                                                                                                                                                                                                                                                                                                                                                                                                                                                                                                                                                                                                                                                                                                                                                                                                                                                                                                         |
| Date Submitted by the Author:   | 11-Dec-2018                                                                                                                                                                                                                                                                                                                                                                                                                                                                                                                                                                                                                                                                                                                                                                                                                                                                                                                                                                      |
| Complete List of Authors:       | Nam, Ji Hyung; Department of Internal Medicine, Dongguk University Ilsan Hospital, Dongguk University College of Medicine<br>Shin, Jaeyong ; Department of Preventive Medicine & Institute of Health Services Research, Yonsei University College of Medicine<br>Jang, Sung-In; College of Medicine Yonsei University, Department of Preventive Medicine<br>Kim, Ji Hyun ; Department of Pediatrics, Dongguk University Ilsan Hospital, Dongguk University College of Medicine<br>Han, Kyu-Tae ; Research and Analysis Team, National Health Insurance Service Ilsan Hospital<br>Lee, Jun Kyu ; Department of Internal Medicine, Dongguk University Ilsan Hospital, Dongguk University College of Medicine<br>Lim, Yun Jeong ; Department of Internal Medicine, Dongguk University Ilsan Hospital, Dongguk University College of Medicine<br>Park, Eun-Cheol; Yonsei University College of Medicine, Department of Preventive Medicine and Institute of Health Services Research |
| <b>Primary Subject Heading</b>: | Public health                                                                                                                                                                                                                                                                                                                                                                                                                                                                                                                                                                                                                                                                                                                                                                                                                                                                                                                                                                    |
| Secondary Subject Heading:      | Paediatrics                                                                                                                                                                                                                                                                                                                                                                                                                                                                                                                                                                                                                                                                                                                                                                                                                                                                                                                                                                      |
| Keywords:                       | Dyslipidemia, Cholesterol, Lipids, Adolescent, Mother                                                                                                                                                                                                                                                                                                                                                                                                                                                                                                                                                                                                                                                                                                                                                                                                                                                                                                                            |
|                                 |                                                                                                                                                                                                                                                                                                                                                                                                                                                                                                                                                                                                                                                                                                                                                                                                                                                                                                                                                                                  |

SCHOLARONE™  
Manuscripts

1  
2  
3  
4 1 **Associations between lipid profiles of adolescents and their mothers based**  
5  
6 2 **on a nationwide health and nutrition survey in South Korea**  
7  
8  
9 3

10  
11 4 Ji Hyung Nam,<sup>1,2</sup> Jaeyong Shin,<sup>3</sup> Sung-In Jang,<sup>3</sup> Ji Hyun Kim,<sup>4</sup> Kyu-Tae Han,<sup>5</sup> Jun Kyu Lee,<sup>1</sup>  
12  
13 5 Yun Jeong Lim,<sup>1</sup> Eun-Cheol Park<sup>3</sup>  
14  
15 6

16  
17  
18 7 <sup>1</sup> Department of Internal Medicine, Dongguk University Ilsan Hospital, Dongguk University  
19  
20 8 College of Medicine, Goyang, Republic of Korea

21  
22 9 <sup>2</sup> Department of Medicine, Graduate School, Yonsei University, Seoul, Republic of Korea

23  
24  
25 10 <sup>3</sup> Department of Preventive Medicine & Institute of Health Services Research, Yonsei  
26  
27 11 University College of Medicine, Seoul, Republic of Korea

28  
29 12 <sup>4</sup> Department of Pediatrics, Dongguk University Ilsan Hospital, Dongguk University College  
30  
31 13 of Medicine, Goyang, Republic of Korea

32  
33  
34 14 <sup>5</sup> Research and Analysis Team, National Health Insurance Service Ilsan Hospital, Goyang,  
35  
36 15 Republic of Korea

37  
38  
39 16  
40  
41 17 Correspondence to

42  
43 18 Eun-Cheol Park, MD, PhD

44  
45 19 Department of Preventive Medicine & Institute of Health Services Research

46  
47 20 Yonsei University College of Medicine

48  
49 21 50-1 Yonsei-ro, Seodaemun-gu, Seoul, 03722, Republic of Korea

50  
51  
52 22 Phone number: 82-2-2228-1862 / Fax number: 82-2-392-8133

53  
54 23 E-mail: [ecpark@yuhs.ac](mailto:ecpark@yuhs.ac)  
55  
56  
57 24  
58  
59 25  
60

## 26 ABSTRACT

27 **Objectives** Dyslipidemia is a metabolic disease influenced by environmental and genetic  
28 factors. Especially family history related to the genetic backgrounds is a strong risk factor of  
29 lipid abnormality. The aim of this study is to evaluate the association between the lipid  
30 profiles of adolescents and their mothers.

31 **Design** A cross-sectional study.

32 **Setting** The data were derived from the Korea National Health and Nutrition Examination  
33 Survey (KNHANES IV-VI) between 2009 and 2015.

34 **Participants** 2,884 adolescents aged 12-18 years and their mothers were included.

35 **Primary outcome measures** Outcome variables were adolescents' lipid levels. Mothers'  
36 lipid levels were interesting variables. The lipid profiles included total cholesterol (TC),  
37 triglyceride (TG), high-density lipoprotein cholesterol (HDL-C), and low-density lipoprotein  
38 cholesterol (LDL-C). We identified partial correlation coefficients ( $r$ ) between the lipids.  
39 Multiple linear regressions were performed to identify an amount change in adolescents' lipid  
40 levels by each unit increase of their mothers' lipids. The regression models included various  
41 clinical characteristics and health behavioral factors of both adolescents and mothers.

42 **Results** The mean levels of adolescents' lipids were 156.6, 83.6, 50.4, and 89.4 mg/dL,  
43 respectively for TC, TG, HDL-C, and LDL-C. Positive correlations between lipid levels of  
44 adolescents and mothers were observed for TC, TG, HDL-C, and LDL-C ( $r$ , 95% confidence  
45 interval = 0.271, 0.236–0.304; 0.204, 0.169–0.239; 0.289, 0.255–0.322; and 0.286, 0.252–  
46 0.319). Adolescent TC level was increased by 0.23 mg/dL for each unit increase of their  
47 mother's TC (standard error (SE), 0.02;  $P < .001$ ). The  $\beta$  coefficients were 0.16 (SE, 0.01),  
48 0.24 (SE, 0.02), and 0.24 (SE, 0.02), respectively, in each model of TG, HDL-C, and LDL-C  
49 (all  $P < .001$ ). The linear relationships were significant regardless of sex and mother  
50 characteristics.

1  
2  
3  
4  
5  
6  
7  
8  
9  
10  
11  
12  
13  
14  
15  
16  
17  
18  
19  
20  
21  
22  
23  
24  
25  
26  
27  
28  
29  
30  
31  
32  
33  
34  
35  
36  
37  
38  
39  
40  
41  
42  
43  
44  
45  
46  
47  
48  
49  
50  
51  
52  
53  
54  
55  
56  
57  
58  
59  
60

51 **Conclusions** Mothers’ lipid levels are associated with adolescents’ lipids, therefore, it can  
52 serve as a reference for the screening of adolescent’s dyslipidemia.

53 **Keywords:** Dyslipidemia, Cholesterol, Lipids, Adolescent, Mother.

For peer review only

1  
2  
3 76 **Strengths and limitations of this study**  
4

5 77 ▶This study analyzed linear relationships of lipid profiles between adolescents and their  
6  
7  
8 78 mothers using a large national database.

9  
10 79 ▶We used survey based statistical analyses based on the design effect related to survey  
11  
12 80 sampling.

13  
14  
15 81 ▶Various health behavioral factors of adolescents and mothers were adjusted.

16  
17 82 ▶There is no causal relationship as this was a cross-sectional study.

18  
19 83 ▶The study did not provide any information on nutritional factors which could be significant  
20  
21 84 confounders.  
22  
23

24 85

25 86

26 87

27 88

28 89

29 90

30 91

31 92

32 93

33 94

34 95

35 96

36 97

37 98

38 99

39 100

## 101 INTRODUCTION

102 Dyslipidemia is a well-known risk factor for cardiovascular disease (CVD) in individuals of  
103 all ages.<sup>1</sup> In Korea, CVD is the second-leading cause of death after cancer.<sup>2</sup> Triglyceride  
104 (TG) and high-density lipoprotein cholesterol (HDL-C) are major components of metabolic  
105 syndrome (MetS). Likewise, the TG to HDL-C ratio, a predictor for small dense low-density  
106 lipoprotein cholesterol (LDL-C), is an independent determinant of arterial stiffness in  
107 adolescents and young adult,<sup>3</sup> which can subsequently accelerate atherosclerosis and increase  
108 cardiovascular events in the second decade of life.<sup>4</sup> Meanwhile, lipid level is strongly linked  
109 to the body mass index (BMI), which is one of the reliable indicators for obesity in  
110 adolescents.<sup>5</sup> Pediatric obesity is affected by various family settings such as eating habits,  
111 lifestyle, and education.<sup>6</sup> The prevalence of pediatric obesity in South Korea has been  
112 increased rapidly from 5.8% in 1997 to 11.5% in 201,<sup>7</sup> which is close to the 13.3% in the  
113 United States.<sup>8</sup> This has increased interest in obesity-related disorders in adolescence, such as  
114 metabolic, cardiovascular, or psychosocial complication.<sup>9</sup> Obesity and dyslipidemia is no  
115 longer the problem of adults alone, therefore, adequate screening and control of dyslipidemia  
116 in adolescence has become important in South Korea.

117  
118 In addition to obesity, various factors such as physical activity, economic status, education  
119 level, nutritional and dietary factors, sleep duration, and psychiatric problems, among others,  
120 have been associated with lipid concentration.<sup>10-12</sup> Meanwhile, family histories usually  
121 provide important information regarding pediatric diseases.<sup>13</sup> Regarding the highly heritable  
122 traits of dyslipidemia, several studies showed that there was a close relationship in the lipid  
123 concentration between parents and their offspring.<sup>14-16</sup> This familial clustering implies that  
124 there may be common denominators including health behavioral factors within a family as  
125 well as genetic backgrounds. In the present study, we investigated clinical and health

1  
2  
3 126 behavioral factors affecting adolescents' lipid levels, and evaluated the association between  
4  
5 127 the lipid profiles of adolescents and their mothers.  
6  
7  
8 128

## 10 129 **METHODS**

### 13 130 **Data source**

15 131 This is a cross-sectional study using a secondary data of the Korea National Health and  
16  
17 132 Nutrition Examination Survey (KNHANES). KNHANES is an ongoing surveillance system  
18  
19 133 conducted by Korea Centers for Disease Control and Prevention (KCDC) since 1998 that  
20  
21 134 assesses health and nutrition status, and monitors health risk factors and the prevalence of  
22  
23 135 chronic diseases.<sup>17</sup> A special survey team visits four regions every week (192 regions per  
24  
25 136 year) and conducts a health examination, health interview, and nutrition survey. This survey  
26  
27 137 used stratified and clustered sampling methods. Among 59,015 individuals who were  
28  
29 138 surveyed in KNHANES between 2009 and 2015, we selected 4,148 adolescents aged 12–18  
30  
31 139 years with available lipid profile data. Next, we obtained data for the mothers of these  
32  
33 140 adolescents during the same survey period by matching household identification numbers.  
34  
35 141 After the exclusion of 1,264 individuals with missing information about adolescent's or  
36  
37 142 mother's baseline characteristics or clinical findings, 2,884 adolescents were eligible for the  
38  
39 143 study (Figure 1). Use of the data from KNHANES was approved by the Institutional Review  
40  
41 144 Board of the KCDC (2009-01CON-03-2C, 2010-02CON-21-C, 2011-02CON-06-C, 2012-  
42  
43 145 01EXP-01-2C, 2013-07CON-03-4C, and 2013-12EXP-03-5C). This survey has been  
44  
45 146 available for use without approval since 2015.  
46  
47  
48  
49  
50

51 147

### 54 148 **Outcome variables and health behavioral factors**

56 149 Both adolescent's and mother's lipid profiles consisted of total cholesterol (TC), TG, HDL-C,  
57  
58 150 and LDL-C. Outcome variables in the study were adolescents' lipid levels. Mothers' lipid  
59  
60

1  
2  
3 151 levels, which represent genetic linkage, were interesting variables. In order to examine their  
4  
5 152 relationship, we adjusted various clinical and health behavioral factors of both adolescents  
6  
7 153 and mothers. The level of LDL-C was calculated using the Friedewald equation. If the TG  
8  
9 154 level was 400 mg/dL or more, measurement of LDL-C was performed by using the  
10  
11 155 immunochemical method. Adolescents were divided into two age groups based on whether  
12  
13 156 they were high school students. In terms of obesity, we divided the study subjects into two  
14  
15 157 groups using an 85% cut-off of the body mass index (BMI) based on the age groups and sex  
16  
17 158 for adolescents, and divided into three groups ( $<23$ ,  $23\text{--}24.9$ ,  $\geq 25$  kg/m<sup>2</sup>) for mothers.<sup>18 19</sup>  
20  
21  
22 159 The values of fasting glucose were also divided into two groups based on the level of  
23  
24 160 impaired fasting glucose ( $\geq 100$  mg/dL). Degree of stress was divided into three groups based  
25  
26 161 on individuals' perception. In addition, frequency of eating out, walking, and exercise per  
27  
28 162 week were investigated for adolescent health behaviors.  
29  
30  
31 163 For mothers' variables, we used data regarding smoking and alcohol habits, degree of  
32  
33 164 education and family income, economic activity, and frequency of eating out per week.  
34  
35 165 Mother's dyslipidemia was defined based on TC level of 240 mg/dL or more, and included  
36  
37 166 cases of individuals diagnosed or treated with dyslipidemia even if the TC level was normal.  
38  
39  
40  
41  
42  
43  
44

## 168 **Statistical methods**

45  
46  
47 169 Lipid profiles were analyzed as continuous variables with mean and standard deviation (SD)  
48  
49 170 in both adolescents and their mothers. We checked whether the continuous variables were  
50  
51 171 normally distributed, and used a log scale depending on the results. Independent sample *t*-  
52  
53 172 tests or one-way analysis of variances (ANOVA) was used for categorical independent  
54  
55 173 variables to analyze the relationship with adolescents' lipid levels. The correlation of lipid  
56  
57 174 levels between adolescents and their mothers was analyzed using partial correlations (*r*) with  
58  
59  
60



1  
2  
3 175 95% confidence interval (CI). The  $r$  values were interpreted as slight ( $>0-0.2$ ), fair ( $>0.2-$   
4  
5 176 0.4), moderate ( $>0.4-0.6$ ), substantial ( $>0.6-0.8$ ), and almost perfect ( $>0.8$ ). Next, multiple  
6  
7  
8 177 linear regressions with parameter estimates (beta coefficients) and standard error (SE) were  
9  
10 178 performed to identify an amount change in adolescents' lipid levels by each unit increase of  
11  
12 179 their mothers' lipids. We used survey based statistical regression analyses, and the design  
13  
14 180 effect relating survey sampling was calculated. The regression models included clinical  
15  
16 181 characteristics and health behavioral factors of both adolescents and mothers. In order to find  
17  
18 182 the most adequate model fits among 16 possible combinations between four adolescents' and  
19  
20 183 their mothers' lipid profiles, we calculated adjusted R squared values, which represent the  
21  
22 184 explanatory power of the model. In addition, the beta coefficients were also determined in the  
23  
24 185 subgroups by sex and mother's characteristics (age group, BMI, degree of education,  
25  
26 186 economic activity, and presence or absence of dyslipidemia) using multiple linear regression.  
27  
28  
29 187 Lastly, sensitivity test was done on 4,148 adolescents including 1,264 subjects who had  
30  
31 188 inadequate baseline information or missing mothers' data to identify the baseline  
32  
33 189 characteristics. All 2-sided  $P$  values  $<0.05$  were considered significant. Statistical analyses  
34  
35 190 were performed using SAS version 9.4 (SAS Institute, Cary, NC, USA).  
36  
37  
38  
39  
40  
41

## 192 **Patient and public involvement**

193 This study is a population-based survey study. Patients and public were not involved.  
44  
45  
46  
47 194

## 195 **RESULTS**

196 Table 1 shows baseline characteristics and their associations with adolescent lipid levels, and  
52  
53 197 all  $P$  values were shown on a log scale. The mean age of the study population was  $14.7 \pm 1.9$   
54  
55 198 years (range, 12–18 years), and 52.8% of the adolescents were male. A total of 9.3% of the  
56  
57 199 individuals were overweight. The mean levels (ranges) of adolescents' lipids were  $156.6 \pm$   
58  
59  
60

1  
2  
3 200 27.0 (82–350),  $83.6 \pm 46.4$  (15–602),  $50.4 \pm 9.8$  (22–96), and  $89.4 \pm 23.3$  mg/dL (9–296),  
4  
5 201 respectively, for TC, TG, HDL-C, and LDL-C. HDL-C level was decreased in the older age  
6  
7 202 group ( $P=0.021$ ). While TC, HDL-C, and LDL-C levels were significantly higher in female  
8  
9 203 adolescents than in their male counterparts, TG was not different by sex. Individuals with  
10  
11 204 increased BMI showed higher TC, TG, and LDL-C levels, and lower HDL-C levels  
12  
13 205 compared with those within the normal percentile range for BMI. The frequency of eating out  
14  
15 206 was inversely associated with TC level ( $P=0.032$ ), while increased frequency of walking was  
16  
17 207 associated with decreased TC and LDL-C levels ( $P=0.006$  and  $P=0.005$ , respectively). TG  
18  
19 208 level tends to increased in the adolescents whose mothers were obese ( $BMI \geq 25$  kg/m<sup>2</sup>),  
20  
21 209 while the level of HDL-C was inversely associated with the mother's BMI and increasing  
22  
23 210 age. Other health behaviors of the mothers' did not show any significant associations with  
24  
25 211 their adolescents' lipid levels.  
26  
27  
28  
29  
30  
31  
32  
33

34 213 Adolescent TC level demonstrated a fair positive correlation with mother's TC level ( $r$ ,  
35  
36 214 0.271; 95% confidence interval (CI), 0.236–0.304) (Supplementary Figure S1). TG, HDL-C,  
37  
38 215 and LDL-C levels also had fair positive correlations between adolescents and their mothers,  
39  
40 216 yielding  $r$  (95% CI) = 0.204 (0.169–0.239), 0.289 (0.255–0.322), and 0.286 (0.252–0.319),  
41  
42 217 respectively. For reference, the correlations among the four adolescent lipid profiles  
43  
44 218 demonstrated an almost perfect correlation between the TC and LDL-C levels ( $r$ , 0.915; 95%  
45  
46 219 CI, 0.909–0.921;  $P<.001$ ), and showed a significant negative correlation between HDL-C and  
47  
48 220 TG ( $r$ , -0.329; 95% CI, -0.361–-0.296;  $P<.001$ ). Meanwhile, the partial correlation coefficient  
49  
50 221 (95% CI) for TC, TG, HDL-C, and LDL-C was 0.254 (0.206-0.301), 0.235 (0.186-0.282),  
51  
52 222 0.271 (0.224-0.317), and 0.267 (0.220-0.313) in males ( $n=1522$ ), and it was 0.291 (0.241-  
53  
54 223 0.339), 0.168 (0.116-0.220), 0.317 (0.268-0.364), and 0.309 (0.260-0.357) in females  
55  
56  
57  
58  
59  
60

1  
2  
3 224 (n=1362). All *P* values were less than 0.001.  
4  
5  
6 225  
7

8 226 Based on the adjusted R squared values, the four most adequate regression models were  
9  
10 227 selected (Supplementary Table S1). Table 2 displays the multiple linear regressions of the  
11  
12 228 four adequate models. The design effect from survey sampling was 1.01, 1.43, 1.07, and 1.07  
13  
14 229 in TC, TG, HDL-C, and LDL-C respectively. Adolescent TC increased by 0.23 mg/dL on  
15  
16 230 average as their mothers' TC increased by 1 mg/dL (SE, 0.02, *P*<.001). The beta coefficients  
17  
18 231 were 0.16 (SE, 0.01), 0.24 (SE, 0.02), and 0.24 (SE, 0.02), respectively, in each model of TG,  
19  
20 232 HDL-C, and LDL-C (all *P*<.001). TC increased by 13.32 mg/dL in the female adolescents  
21  
22 233 compared with their male counterparts; other lipid parameters except for TG were also higher  
23  
24 234 in female adolescents compared with their male counterparts. BMI had a positive association  
25  
26 235 with the levels of TC, TG, and LDL-C, while HDL-C was negatively associated with BMI.  
27  
28 236 The frequency of eating out and walking tended to be inversely associated with TC and LDL-  
29  
30 237 C. Exercise more than 3 days per week was associated with increased TC and LDL-C levels  
31  
32 238 compared with no exercise. With regard to mother's variables, overall adolescents' lipid  
33  
34 239 levels tended to decrease as their mothers' age increased, and other lipids apart from HDL-C  
35  
36 240 tended to decrease when the mother's BMI increased. Increased mothers' alcohol  
37  
38 241 consumption was also significantly associated with decreased adolescents' HDL-C. Mothers'  
39  
40 242 education, working hours, frequency of eating out, and family income did not affect  
41  
42 243 adolescent lipid levels.  
43  
44  
45  
46  
47  
48  
49  
50

51 244  
52 245 Figure 2 represents the amount change in adolescents' lipid levels with each unit increase of  
53  
54 246 mothers' lipids in the subgroups. In most subgroups, there were significant positive  
55  
56 247 relationships between lipids in adolescents and mothers, with the exception of subgroups with  
57  
58 248 relatively small sample sizes (Table 3). The beta coefficients of TC, HDL-C, and LDL-C  
59  
60

1  
2  
3 249 were high in female adolescents compared with their male counterparts, whereas that of TG  
4  
5 250 was higher in the male adolescents. When the lipid profiles were considered as binary  
6  
7  
8 251 outcomes, multivariate logistic regressions showed that adolescents' dyslipidemia was  
9  
10 252 significantly associated with mothers' dyslipidemia (Supplementary Table S2). Finally, the  
11  
12 253 sensitivity test on 4,148 adolescents showed comparable baseline characteristics with our  
13  
14 254 study data (Supplementary Table S3).  
15  
16  
17 255

## 19 256 **DISCUSSIONS**

21  
22 257 There is significance in that our study analyzed linear relationships of TC, TG, HDL-C, and  
23  
24 258 LDL-C, respectively, with an amount change of adolescents' lipid levels for each unit  
25  
26 259 increase of their mothers' lipids. We adjusted for various health behavioral factors of  
27  
28 260 adolescents and their mothers, as well as using a large national database. Moreover, we found  
29  
30 261 that relationships between lipids of adolescents and their mothers were significant regardless  
31  
32 262 of sex and mother characteristics.  
33  
34  
35 263

36  
37  
38 264 Atherosclerosis is triggered by childhood obesity associated with lipid abnormalities, rather  
39  
40 265 than obesity itself.<sup>20</sup> The prevalence of dyslipidemia was 6.5% in Korea by the cut-off of  
41  
42 266 National Cholesterol Education Program (NECP) and American Heart Association (AHA)  
43  
44 267 guidelines.<sup>21</sup> Meanwhile, the most frequent components among five MetS criteria in  
45  
46 268 adolescence were high TG (21.2%) and low HDL-C (13.6%).<sup>22</sup> When cut-off values of a  
47  
48 269 recent guideline were applied to our data,<sup>23</sup> the percentages of abnormal TC ( $\geq 200$  mg/dL),  
49  
50  
51  
52  
53 270 TG ( $\geq 130$  mg/dL), HDL-C ( $<40$  mg/dL), and LDL-C ( $\geq 130$  mg/dL) were 6.6%, 11.9%,  
54  
55  
56 271 13.3%, and 5.0%, respectively. Atherogenic dyslipidemia, characterized by the combination  
57  
58 272 of high TG and small dense LDL-C, and low HDL-C, was a common form of dyslipidemia in  
59  
60

1  
2  
3 273 young individuals (aged, 2–18 years) and had a strong familial aggregation.<sup>24</sup> Even taking  
4  
5  
6 274 into consideration the argument that a higher cut-off level of TG ( $\geq 150$  mg/dL) is appropriate  
7  
8  
9 275 for Korean adolescents,<sup>25</sup> the rate of high TG observed in the present study was 7.7%. That is,  
10  
11 276 our data showed a more considerable proportion of abnormal TG and HDL-C in adolescents  
12  
13 277 compared to other lipid parameters. Thus, the present study provides further evidence that  
14  
15 278 dyslipidemia especially atherogenic dyslipidemia is a big problem in Korean adolescents,  
16  
17  
18 279 with the concern that it leads to CVD during the remainder of the lifespan.  
19

20  
21 280  
22  
23 281 It has been reported that dyslipidemia was associated with increased odds of dyslipidemia in  
24  
25 282 first-degree relatives (OR = 2.2).<sup>26</sup> This familial clustering is in turn caused by both genetic  
26  
27 283 backgrounds and shared environmental factors within a family. A previous study found that  
28  
29 284 genes contribute more than environment to familial correlation of lipids and obesity.<sup>15</sup> In this  
30  
31 285 regard, numerous genetic determinants regulating lipid concentrations has been  
32  
33 286 investigated.<sup>27</sup> In addition, an animal study demonstrated that maternal dyslipidemia affected  
34  
35 287 offspring's lipid levels by activation of endogenous cholesterol synthesis.<sup>28</sup> Whatever the  
36  
37  
38 288 cause or, a family history must be a major risk factor for adolescent's dyslipidemia.  
39  
40 289 Meanwhile, even in the subgroup of mothers who had normal TC levels and had never been  
41  
42  
43 290 diagnosed with dyslipidemia, the positive relationships in lipids between the adolescents and  
44  
45 291 their mothers were significant for all lipid parameters. These findings may reflect  
46  
47  
48 292 environmental impacts such as healthy diet, exercise habits, and efforts to improve lifestyles  
49  
50 293 within families, rather than just a hereditary influence. Of course, there may also be an impact  
51  
52 294 from other genetic factors such as diabetes or hypertension in first-degree relatives.<sup>26</sup>  
53  
54 295 Interestingly, the beta coefficient was higher in adolescents with non-obese mothers  
55  
56 296 compared to those with obese mothers. It is possible that the genetic background of non-  
57  
58  
59  
60

1  
2  
3 297 obese dyslipidemic mothers affected the lipid levels of their offspring. However, the mean  
4  
5 298 BMI of dyslipidemic mothers was higher than that of non-dyslipidemic mothers (24.7 kg/m<sup>2</sup>  
6  
7  
8 299 vs. 23.2 kg/m<sup>2</sup>). Moreover, the beta coefficient was also higher in adolescents with non-  
9  
10 300 dyslipidemic mothers than in those with dyslipidemic mothers. Thus, it is more likely that the  
11  
12 301 mothers' perception regarding dyslipidemia influences the adolescents' lipid levels. Of  
13  
14 302 course, this interpretation requires consideration of relationship between lipids and  
15  
16 303 characteristics in mothers. Awareness of dyslipidemia was relatively low despite its higher  
17  
18 304 prevalence worldwide.<sup>29</sup> A mother's perception of lipid levels could affect her children's  
19  
20 305 lipids through efforts related to lifestyle and diet changes.<sup>30</sup> A recent Korean study  
21  
22 306 highlighted education and counseling in order to change health behavior in addition to  
23  
24 307 awareness of dyslipidemia.<sup>31</sup> Our results from subgroup analyses support these previous  
25  
26 308 studies and highlight the influence of the mother's perception of dyslipidemia and resultant  
27  
28 309 lifestyle changes.  
29  
30  
31  
32

33 310  
34  
35 311 There is no doubt that lifestyle modification plays a central role in lipid control. Moreover,  
36  
37 312 considering the high rates of abnormal TG and HDL-C and the restricted indications of lipid-  
38  
39 313 lowering agents in youth, lifestyle changes should play a larger role in adolescent patients.  
40  
41 314 Our results showed that frequent walking was negatively associated with TC and LDL-C  
42  
43 315 levels, which is predictable. Meanwhile, frequent eating out was associated with decreased  
44  
45 316 TC and LDL-C, a finding that conflicts with a general notion that eating out induces a high  
46  
47 317 calorie intake or overeating. Eating out was defined as all foods except home-cooked dishes  
48  
49 318 in this survey, then including school meals as well as dining out and delivery foods. Actually,  
50  
51 319 the frequency of eating out showed a great discrepancy between adolescents and mothers in  
52  
53 320 this study. Thus, school foods may compensate for negative effects of eating out by providing  
54  
55 321 regular and well-balanced meals. The positive correlation between exercise and lipid levels,  
56  
57  
58  
59  
60

1  
2  
3 322 which is also an unexpected result, seems to be influenced by exercise intensity. Exercise  
4  
5 323 frequency alone was not sufficient to explain the effect of exercise adequately; thus, the  
6  
7 324 strength and duration of exercise should be considered. Our data regarding health behavioral  
8  
9 325 factors should be more detailed and concrete. However, it is certain that health behavioral  
10  
11 326 habits influence the lipid levels of adolescents, and therefore adolescents with dyslipidemia  
12  
13 327 and their families should be encouraged to improve their lifestyles.  
14  
15  
16  
17 328

18  
19 329 Cholesterol levels in children and adolescents are highly dependent on age and sex.<sup>32</sup> Our  
20  
21 330 data showed that the levels of TC, LDL-C, and HDL-C were higher in female adolescents  
22  
23 331 than in males. In addition, the beta coefficients per unit increase of mother's TC, LDL-C, and  
24  
25 332 HDL-C were also prominent in females. It is possible that mothers with female offspring are  
26  
27 333 either more obese and dyslipidemic or otherwise. However, mother's mean BMI was similar  
28  
29 334 between male and female adolescents ( $23.3 \pm 3.2$  and  $23.5 \pm 3.3$  kg/m<sup>2</sup>, respectively,  $P=0.161$ );  
30  
31 335 furthermore, the rate of mother's dyslipidemia showed no statistical difference between male  
32  
33 336 and female adolescents (10.8% vs. 9.8%, respectively,  $P=0.373$ ). Thus, the difference of beta  
34  
35 337 coefficient by sex may be due to a distinct difference in lipid levels by sex. This is supported  
36  
37 338 by our result that the TG level was higher in male than in female adolescents and the beta  
38  
39 339 coefficient of TG was also higher in male adolescents.  
40  
41  
42  
43  
44  
45  
46  
47  
48  
49  
50  
51  
52  
53  
54  
55  
56  
57  
58  
59  
60

340  
341 This study has several limitations. First, because it is a survey-based study, our data are  
342  
343 vulnerable to recall bias. Second, as it is a cross-sectional design, there was no causal  
344  
345 relationship. This factor will be particularly important in consideration of the impacts due to  
environmental factors. Further well-designed cohort studies are warranted. Third, individuals  
who responded to the national survey could have greater health concerns. They may have

1  
2  
3 346 better health behavioral habits, or family members with chronic diseases. However, this  
4  
5 347 survey was uniformly performed in all regions of Korea and targeted all age groups; thus, our  
6  
7 348 data can be considered nationally representative samples. Fourth, the nutritional factors,  
8  
9 349 which were not considered in the analyses because of insufficient information and large  
10  
11 350 missing values, can be significant confounding factors. Further studies based on detailed  
12  
13 351 surveys for health behavioral factors and nutritional elements are needed. Fifth, we did not  
14  
15 352 evaluate the father's lipid levels. If the father's lipid levels had also been considered, the  
16  
17 353 genetic backgrounds of lipids might be emphasized more. Sixth, various comorbidities such  
18  
19 354 as hypothyroidism, Cushing's disease, liver disease, and nephrotic syndrome, among others,  
20  
21 355 as well as long-term use of steroid can affect lipid level,<sup>33</sup> and these could be also  
22  
23 356 confounding factors. However, these chronic diseases are extremely rare during the  
24  
25 357 adolescent period, and thus could be negligible. Finally, our study might be vulnerable to bias  
26  
27 358 originating from multiple testing. Especially, four dependent variables rise level of  
28  
29 359 significance leading to the problem of high type-I error. However, even considering this, the  
30  
31 360 *P* values for the associations are sufficiently significant. Additionally, R-squared indicates  
32  
33 361 just how well the model explains variability of the response data. Although we chose four  
34  
35 362 models, which showed high R-squared, it does not mean accurate representation of goodness  
36  
37 363 of fit for the models.  
38  
39  
40  
41  
42  
43  
44  
45  
46

47 365 In conclusion, a mother's lipid levels were positively associated with her adolescents' lipid  
48  
49 366 levels because of both genetic and environmental factors within the family. Adolescent  
50  
51 367 dyslipidemia creates a large risk factor burden for cardiovascular diseases; therefore, timely  
52  
53 368 screening for dyslipidemia is important, especially for indicated adolescents. Our positive  
54  
55 369 correlation between lipids of adolescents and their mothers supports that the mother's lipid  
56  
57 370 level is an appropriate reference for the screening of the adolescent's dyslipidemia.  
58  
59  
60



371

372 **Acknowledgements** The authors thank the participants for their cooperation and the staffs of  
373 KNHANES (<https://knhanes.cdc.go.kr/knhanes/index.do>) for their hard work.

374 **Contributors** E.C.P and S.I.J designed the study. J.H.N. and J.S. analyzed and interpreted  
375 the data. J.H.N., J.K.L., and Y.J.L. drafted the manuscript. J.H.K. and K.T.H critically  
376 revised the manuscript. All authors read and approved the final version.

377 **Funding** This work was not supported by any funding.

378 **Competing interests** The authors declare no competing interest.

379 **Participant consent** This nationwide survey is fully anonymized and does not require  
380 informed consent.

381 **Ethics approval** This study was analyzed using KNHANES secondary data. Use of the data  
382 was approved by the Institutional Review Board of the KCDC.

383 **Availability of data and material** All data analyzed during this study are available in the  
384 KCDC and KNHANES repository, [[https://knhanes.cdc.go.kr/knhanes/sub03/sub03\\_01.do](https://knhanes.cdc.go.kr/knhanes/sub03/sub03_01.do)]

385

## 386 REFERENCES

- 387 1. Berenson GS, Srinivasan SR, Bao W, et al. Association between multiple  
388 cardiovascular risk factors and atherosclerosis in children and young adults. The  
389 Bogalusa Heart Study. N Engl J Med 1998;338:1650-6.
- 390 2. Cause-of-death statistics in the Republic of Korea, 2014. J Korean Med Assoc  
391 2016;59:221-32.
- 392 3. Urbina EM, Khoury PR, McCoy CE, et al. Triglyceride to HDL-C ratio and increased  
393 arterial stiffness in children, adolescents, and young adults. Pediatrics  
394 2013;131:e1082-90.
- 395 4. McGill HC, Jr., McMahan CA, Zieske AW, et al. Associations of coronary heart

- 1  
2  
3 396 disease risk factors with the intermediate lesion of atherosclerosis in youth. The  
4  
5 397 Pathobiological Determinants of Atherosclerosis in Youth (PDAY) Research Group.  
6  
7 398 *Arterioscler Thromb Vasc Biol* 2000;20:1998-2004.  
9  
10 399 5. Margolis KL, Greenspan LC, Trower NK, et al. Lipid screening in children and  
11  
12 400 adolescents in community practice: 2007 to 2010. *Circ Cardiovasc Qual Outcomes*  
13  
14 401 2014;7:718-26.  
16  
17 402 6. Smetanina N, Albaviciute E, Babinska V, et al. Prevalence of overweight/obesity in  
18  
19 403 relation to dietary habits and lifestyle among 7-17 years old children and adolescents  
20  
21 404 in Lithuania. *BMC Public Health* 2015;15:1001.  
23  
24 405 7. Korea Centers for Disease Control and Prevention. Korea Health Statistics 2014:  
25  
26 406 Korea National Health and Nutrition Examination Survey (KNHANES VI-2);  
27  
28 407 Ministry of Health and Welfare: Seoul, Korea. 2014.  
30  
31 408 8. Ogden CL, Carroll MD, Curtin LR, et al. Prevalence of high body mass index in US  
32  
33 409 children and adolescents, 2007-2008. *JAMA* 2010;303:242-9.  
34  
35 410 9. Ha KH, Kim DJ. Epidemiology of Childhood Obesity in Korea. *Endocrinol Metab*  
36  
37 411 (Seoul) 2016;31:510-8.  
39  
40 412 10. Wang CJ, Li YQ, Wang L, et al. Development and evaluation of a simple and  
41  
42 413 effective prediction approach for identifying those at high risk of dyslipidemia in rural  
43  
44 414 adult residents. *PLoS One* 2012;7:e43834.  
46  
47 415 11. Danese A, Moffitt TE, Harrington H, et al. Adverse childhood experiences and adult  
48  
49 416 risk factors for age-related disease: depression, inflammation, and clustering of  
50  
51 417 metabolic risk markers. *Arch Pediatr Adolesc Med* 2009;163:1135-43.  
53  
54 418 12. Buitrago-Lopez A, van den Hooven EH, Rueda-Clausen CF, et al. Socioeconomic  
55  
56 419 status is positively associated with measures of adiposity and insulin resistance, but  
57  
58 420 inversely associated with dyslipidaemia in Colombian children. *J Epidemiol*  
59  
60

- 1  
2  
3 421 Community Health 2015;69:580-7.  
4  
5 422 13. Tarini BA, McInerney JD. Family history in primary care pediatrics. Pediatrics  
6  
7 423 2013;132:S203-10.  
8  
9  
10 424 14. Kathiresan S, Manning AK, Demissie S, et al. A genome-wide association study for  
11  
12 425 blood lipid phenotypes in the Framingham Heart Study. BMC Med Genet 2007;8  
13  
14 426 Suppl 1:S17.  
15  
16  
17 427 15. Hunt SC, Hasstedt SJ, Kuida H, et al. Genetic heritability and common environmental  
18  
19 428 components of resting and stressed blood pressures, lipids, and body mass index in  
20  
21 429 Utah pedigrees and twins. Am J Epidemiol 1989;129:625-38.  
22  
23  
24 430 16. Predazzi IM, Sobota RS, Sanna S, et al. Sex-Specific Parental Effects on Offspring  
25  
26 431 Lipid Levels. J Am Heart Assoc 2015;4:e001951.  
27  
28  
29 432 17. Kweon S, Kim Y, Jang MJ, et al. Data resource profile: the Korea National Health  
30  
31 433 and Nutrition Examination Survey (KNHANES). Int J Epidemiol 2014;43:69-77.  
32  
33  
34 434 18. Park HW, Yoo HY, Kim CH, et al. Reference values of body composition indices: the  
35  
36 435 Korean National Health and Nutrition Examination Surveys. Yonsei Med J  
37  
38 436 2015;56:95-102.  
39  
40  
41 437 19. Jee SH, Sull JW, Park J, et al. Body-mass index and mortality in Korean men and  
42  
43 438 women. N Engl J Med 2006;355:779-87.  
44  
45 439 20. D'Adamo E, Guardamagna O, Chiarelli F, et al. Atherogenic dyslipidemia and  
46  
47 440 cardiovascular risk factors in obese children. Int J Endocrinol 2015;2015:912047.  
48  
49 441 21. Lim JS. The current state of dyslipidemia in Korean children and adolescents and its  
50  
51 442 management in clinical practice. Ann Pediatr Endocrinol Metab 2013;18:1-8.  
52  
53  
54 443 22. Kim S, So WY. Prevalence of Metabolic Syndrome among Korean Adolescents  
55  
56 444 According to the National Cholesterol Education Program, Adult Treatment Panel III  
57  
58 445 and International Diabetes Federation. Nutrients 2016;8:558.  
59  
60

- 1  
2  
3 446 23. Expert Panel on Integrated Guidelines for Cardiovascular H, Risk Reduction in C,  
4  
5 447 Adolescents, National Heart L, Blood I. Expert panel on integrated guidelines for  
6  
7 448 cardiovascular health and risk reduction in children and adolescents: summary report.  
8  
9 449 Pediatrics 2011;128 Suppl 5:S213-56.  
10  
11  
12 450 24. Montali A, Truglio G, Martino F, et al. Atherogenic dyslipidemia in children:  
13  
14 451 evaluation of clinical, biochemical and genetic aspects. PLoS One 2015;10:e0120099.  
15  
16  
17 452 25. Yoon JM. Dyslipidemia in children and adolescents: when and how to diagnose and  
18  
19 453 treat? *Pediatr Gastroenterol Hepatol Nutr* 2014;17:85-92.  
20  
21  
22 454 26. Khoury M, Manlhiot C, Gibson D, et al. Universal screening for cardiovascular  
23  
24 455 disease risk factors in adolescents to identify high-risk families: a population-based  
25  
26 456 cross-sectional study. *BMC Pediatr* 2016;16:11.  
27  
28  
29 457 27. Calandra S, Tarugi P, Speedy HE, et al. Mechanisms and genetic determinants  
30  
31 458 regulating sterol absorption, circulating LDL levels, and sterol elimination:  
32  
33 459 implications for classification and disease risk. *J Lipid Res* 2011;52:1885-926.  
34  
35  
36 460 28. Goharkhay N, Tamayo EH, Yin H, et al. Maternal hypercholesterolemia leads to  
37  
38 461 activation of endogenous cholesterol synthesis in the offspring. *Am J Obstet Gynecol*  
39  
40 462 2008;199:273 e271-6.  
41  
42  
43 463 29. Zhang FL, Xing YQ, Wu YH, et al. The prevalence, awareness, treatment, and control  
44  
45 464 of dyslipidemia in northeast China: a population-based cross-sectional survey. *Lipids*  
46  
47 465 *Health Dis* 2017;16:61.  
48  
49  
50 466 30. Price JH, Casler SM. African-American mothers' perceptions of cholesterol and its  
51  
52 467 effects on their children. *J Natl Med Assoc* 1996;88:145-50.  
53  
54  
55 468 31. Cho IY, Park HY, Lee K, et al. Association Between the Awareness of Dyslipidemia  
56  
57 469 and Health Behavior for Control of Lipid Levels Among Korean Adults with  
58  
59 470 Dyslipidemia. *Korean J Fam Med* 2017;38:64-74.  
60

- 1  
2  
3 471 32. Skinner AC, Steiner MJ, Chung AE, et al. Cholesterol curves to identify population  
4  
5 472 norms by age and sex in healthy weight children. *Clin Pediatr (Phila)* 2012;51:233-7.  
6  
7 473 33. Vodnala D, Rubenfire M, Brook RD. Secondary causes of dyslipidemia. *Am J Cardiol*  
8  
9 474 2012;110:823-5.  
10  
11

475

476

## 477 **FIGURE LEGENDS**

478 **Figure 1** Study flow showing sample selection. We selected 2,884 adolescents aged 12–18  
479 whose mothers' data were also available.

480 **Figure 2** Bar graphs showing standardized beta coefficients of adolescent's lipids for each  
481 unit increase of their mother's lipids in subgroups. HDL-C, high-density lipoprotein  
482 cholesterol; LDL-C, low-density lipoprotein cholesterol; TC, total cholesterol; TG,  
483 triglyceride.

**Table 1** Relationship between baseline characteristics and adolescent's lipid profiles

|                             | No. (%)     | TC    |      |                             | TG    |      |                             | HDL-C |      |                             | LDL-C |      |                             |
|-----------------------------|-------------|-------|------|-----------------------------|-------|------|-----------------------------|-------|------|-----------------------------|-------|------|-----------------------------|
|                             |             | Mean  | SD   | <i>P</i> value <sup>†</sup> |
| All (n=2884)                |             | 156.6 | 27.0 |                             | 83.6  | 46.4 |                             | 50.4  | 9.8  |                             | 89.4  | 23.3 |                             |
| <b>Adolescent variables</b> |             |       |      |                             |       |      |                             |       |      |                             |       |      |                             |
| Age (years)                 |             |       |      | 0.359                       |       |      | 0.825                       |       |      | 0.021                       |       |      | 0.932                       |
| 12-14                       | 1454 (50.4) | 156.9 | 26.4 |                             | 84.0  | 47.0 |                             | 50.8  | 9.8  |                             | 89.2  | 22.8 |                             |
| 15-18                       | 1430 (49.6) | 156.2 | 27.6 |                             | 83.1  | 45.8 |                             | 50.0  | 9.8  |                             | 89.6  | 23.8 |                             |
| Sex                         |             |       |      | <.001                       |       |      | 0.729                       |       |      | <.001                       |       |      | <.001                       |
| Male                        | 1522 (52.8) | 151.4 | 27.1 |                             | 84.6  | 49.7 |                             | 48.7  | 9.6  |                             | 85.9  | 23.5 |                             |
| Female                      | 1362 (47.2) | 162.3 | 25.9 |                             | 82.4  | 42.3 |                             | 52.4  | 9.7  |                             | 93.4  | 22.5 |                             |
| BMI*                        |             |       |      | 0.016                       |       |      | <.001                       |       |      | <.001                       |       |      | <.001                       |
| <85%                        | 2617 (90.7) | 156.1 | 26.6 |                             | 81.0  | 44.6 |                             | 51.1  | 9.7  |                             | 88.9  | 22.9 |                             |
| ≥85%                        | 267 (9.3)   | 160.7 | 30.7 |                             | 109.1 | 55.5 |                             | 44.2  | 8.0  |                             | 94.6  | 26.3 |                             |
| Glucose (mg/dl)             |             |       |      | 0.047                       |       |      | 0.536                       |       |      | 0.987                       |       |      | 0.438                       |
| ≤100                        | 2752 (95.4) | 156.4 | 26.8 |                             | 83.4  | 46.2 |                             | 50.4  | 9.8  |                             | 89.3  | 23.1 |                             |
| >100                        | 132 (4.6)   | 159.6 | 32.1 |                             | 86.8  | 49.9 |                             | 50.5  | 10.0 |                             | 91.7  | 27.7 |                             |
| Stress level                |             |       |      | 0.439                       |       |      | 0.955                       |       |      | 0.545                       |       |      | 0.335                       |
| Non                         | 476 (16.5)  | 156.9 | 28.3 |                             | 82.8  | 43.9 |                             | 50.1  | 9.6  |                             | 90.2  | 24.6 |                             |
| Mild                        | 1714 (59.4) | 156.9 | 26.8 |                             | 83.7  | 45.7 |                             | 50.6  | 9.9  |                             | 89.6  | 23.3 |                             |
| Moderate                    | 694 (24.1)  | 155.5 | 26.8 |                             | 83.8  | 49.7 |                             | 50.3  | 9.7  |                             | 88.4  | 22.5 |                             |
| Eating out/week             |             |       |      | 0.032                       |       |      | 0.368                       |       |      | 0.471                       |       |      | 0.118                       |
| ≥7                          | 1121 (38.9) | 154.8 | 26.3 |                             | 81.0  | 40.4 |                             | 50.1  | 9.7  |                             | 88.4  | 22.9 |                             |
| 5-6                         | 1676 (58.1) | 157.5 | 27.4 |                             | 85.1  | 50.0 |                             | 50.6  | 9.8  |                             | 89.9  | 23.6 |                             |
| 1-4                         | 66 (2.3)    | 159.3 | 25.6 |                             | 85.6  | 44.9 |                             | 50.4  | 10.5 |                             | 91.6  | 21.0 |                             |
| <1                          | 21 (0.7)    | 164.6 | 33.3 |                             | 90.4  | 48.2 |                             | 48.4  | 9.5  |                             | 98.0  | 27.2 |                             |
| Walking/week                |             |       |      | 0.006                       |       |      | 0.955                       |       |      | 0.542                       |       |      | 0.005                       |
| 0-1 day                     | 321 (11.1)  | 159.1 | 26.4 |                             | 84.9  | 56.3 |                             | 50.8  | 10.1 |                             | 91.4  | 22.1 |                             |
| 2-4 days                    | 502 (17.4)  | 157.9 | 27.0 |                             | 84.4  | 44.6 |                             | 50.1  | 9.5  |                             | 90.8  | 23.7 |                             |
| 5-6 days                    | 760 (26.4)  | 157.9 | 28.6 |                             | 83.8  | 47.6 |                             | 50.8  | 9.9  |                             | 90.4  | 24.3 |                             |
| 7 days                      | 1301 (45.1) | 154.6 | 26.2 |                             | 82.8  | 43.6 |                             | 50.2  | 9.8  |                             | 87.8  | 22.7 |                             |
| Exercise/week               |             |       |      | 0.108                       |       |      | 0.193                       |       |      | 0.021                       |       |      | 0.382                       |
| Non                         | 1846 (64.0) | 157.3 | 26.8 |                             | 84.4  | 47.0 |                             | 50.8  | 10.0 |                             | 89.5  | 22.8 |                             |
| 1-2days                     | 633 (22.0)  | 155.7 | 27.5 |                             | 81.9  | 45.5 |                             | 49.5  | 9.1  |                             | 89.7  | 24.0 |                             |
| ≥3days                      | 405 (14.0)  | 154.7 | 27.4 |                             | 82.2  | 45.0 |                             | 50.1  | 9.8  |                             | 88.2  | 24.5 |                             |
| <b>Mother variables</b>     |             |       |      |                             |       |      |                             |       |      |                             |       |      |                             |
| Age (years)                 |             |       |      | 0.091                       |       |      | 0.502                       |       |      | 0.023                       |       |      | 0.566                       |
| 30-39                       | 505 (17.5)  | 157.7 | 25.8 |                             | 85.5  | 46.7 |                             | 51.2  | 9.7  |                             | 89.3  | 21.9 |                             |
| 40-49                       | 2154 (74.7) | 156.7 | 27.4 |                             | 83.3  | 46.7 |                             | 50.4  | 9.9  |                             | 89.6  | 23.7 |                             |
| 50-59                       | 225 (7.8)   | 153.1 | 26.1 |                             | 82.0  | 43.0 |                             | 49.0  | 8.7  |                             | 87.6  | 22.1 |                             |
| BMI (kg/m <sup>2</sup> )    |             |       |      | 0.486                       |       |      | 0.063                       |       |      | <.001                       |       |      | 0.475                       |

|    |                 |             |       |      |       |      |      |       |      |      |       |      |       |
|----|-----------------|-------------|-------|------|-------|------|------|-------|------|------|-------|------|-------|
| 1  |                 |             |       |      |       |      |      |       |      |      |       |      |       |
| 2  |                 |             |       |      |       |      |      |       |      |      |       |      |       |
| 3  | <23             | 1430 (49.6) | 156.6 | 26.4 |       | 82.2 | 42.9 |       | 51.1 | 9.7  |       | 89.0 | 22.3  |
| 4  | 23-24.9         | 684 (23.7)  | 155.6 | 26.7 |       | 81.9 | 44.6 |       | 50.1 | 9.7  |       | 89.1 | 23.2  |
| 5  | ≥25             | 770 (26.7)  | 157.4 | 28.5 |       | 87.6 | 53.4 |       | 49.5 | 10.0 |       | 90.5 | 25.1  |
| 6  | Smoking status  |             |       |      | 0.409 |      |      | 0.175 |      |      | 0.138 |      | 0.124 |
| 7  | Non             | 2648 (91.8) | 156.4 | 27.1 |       | 83.4 | 46.8 |       | 50.5 | 9.8  |       | 89.2 | 23.3  |
| 8  | Ex-Current      | 89 (3.1)    | 159.2 | 26.1 |       | 82.1 | 41.1 |       | 49.8 | 9.5  |       | 92.8 | 22.7  |
| 9  | Drinking status |             |       |      | 0.392 |      |      | 0.569 |      |      | 0.383 |      | 0.154 |
| 10 | Non             | 718 (24.9)  | 155.4 | 27.0 |       | 82.7 | 47.5 |       | 50.8 | 9.8  |       | 88.0 | 23.1  |
| 11 | ≤1/month        | 1250 (43.3) | 157.0 | 27.2 |       | 83.2 | 46.3 |       | 50.2 | 9.7  |       | 90.2 | 23.6  |
| 12 | ≥2/month        | 916 (31.8)  | 156.8 | 26.9 |       | 84.8 | 45.6 |       | 50.4 | 9.9  |       | 89.4 | 23.0  |
| 13 | Education level |             |       |      | 0.848 |      |      | 0.168 |      |      | 0.455 |      | 0.918 |
| 14 | Elementary      | 96 (3.3)    | 155.5 | 27.5 |       | 84.9 | 47.5 |       | 49.8 | 9.8  |       | 88.7 | 24.9  |
| 15 | Middle          | 177 (6.1)   | 157.1 | 28.5 |       | 84.5 | 46.0 |       | 49.9 | 8.8  |       | 90.3 | 24.6  |
| 16 | High            | 1624 (56.3) | 157.0 | 27.6 |       | 85.2 | 48.6 |       | 50.3 | 9.9  |       | 89.6 | 23.9  |
| 17 | University      | 987 (34.2)  | 155.9 | 25.8 |       | 80.6 | 42.3 |       | 50.8 | 9.7  |       | 89.0 | 21.8  |
| 18 | Income (1,000\) |             |       |      | 0.333 |      |      | 0.495 |      |      | 0.323 |      | 0.445 |
| 19 | <1,000          | 219 (7.6)   | 157.9 | 28.6 |       | 87.9 | 49.3 |       | 50.0 | 9.5  |       | 90.2 | 24.6  |
| 20 | 1,000-1,999     | 696 (24.1)  | 154.7 | 24.7 |       | 84.2 | 50.9 |       | 49.9 | 9.5  |       | 88.0 | 21.3  |
| 21 | 2,000-2,999     | 976 (33.8)  | 156.9 | 27.2 |       | 83.3 | 45.3 |       | 50.8 | 9.8  |       | 89.5 | 23.7  |
| 22 | ≥3,000          | 993 (34.4)  | 157.3 | 28.1 |       | 82.4 | 43.4 |       | 50.6 | 10.1 |       | 90.2 | 23.9  |
| 23 | Working hours   |             |       |      | 0.936 |      |      | 0.873 |      |      | 0.643 |      | 0.703 |
| 24 | Non             | 1679 (58.2) | 156.5 | 26.4 |       | 83.2 | 46.4 |       | 50.3 | 9.8  |       | 89.6 | 22.7  |
| 25 | Full-time       | 906 (31.4)  | 156.7 | 27.9 |       | 84.0 | 47.4 |       | 50.6 | 9.5  |       | 89.2 | 24.4  |
| 26 | Part time       | 299 (10.4)  | 156.3 | 27.9 |       | 84.3 | 42.9 |       | 50.3 | 10.5 |       | 89.0 | 23.2  |
| 27 | Eating out/week |             |       |      | 0.443 |      |      | 0.630 |      |      | 0.369 |      | 0.355 |
| 28 | ≥7              | 370 (12.8)  | 155.5 | 27.9 |       | 80.2 | 40.0 |       | 51.1 | 9.7  |       | 88.3 | 25.8  |
| 29 | 5-6             | 615 (21.3)  | 157.1 | 28.5 |       | 83.5 | 43.4 |       | 50.0 | 9.7  |       | 90.4 | 24.1  |
| 30 | 1-4             | 1278 (44.3) | 156.0 | 26.5 |       | 83.5 | 46.8 |       | 50.4 | 10.0 |       | 88.9 | 22.5  |
| 31 | <1              | 621 (21.5)  | 157.7 | 26.1 |       | 85.7 | 51.6 |       | 50.5 | 9.5  |       | 90.1 | 22.6  |

\*Based on body mass index (kg/m<sup>2</sup>) for age percentiles in male and female

†P values determined by log normal distributions

BMI, body mass index; HDL-C, high-density lipoprotein cholesterol; LDL-C, low-density lipoprotein cholesterol; SD, standard deviation; TC, total cholesterol; TG, triglyceride.

**Table 2** Multivariate analyses of four regression models for adolescent and mother’s lipid profiles

|                                            | TC & TC |        |       |                | TG & TG |        |       |                | HDL-C & HDL-C |        |       |                | LDL-C & LDL-C |        |       |                |
|--------------------------------------------|---------|--------|-------|----------------|---------|--------|-------|----------------|---------------|--------|-------|----------------|---------------|--------|-------|----------------|
|                                            | $\beta$ | S.B.   | S.E.  | <i>P</i> value | $\beta$ | S.B.   | S.E.  | <i>P</i> value | $\beta$       | S.B.   | S.E.  | <i>P</i> value | $\beta$       | S.B.   | S.E.  | <i>P</i> value |
| <b>Mother lipids</b><br>(beta coefficient) | 0.229   | 0.268  | 0.015 | <.001          | 0.161   | 0.215  | 0.020 | <.001          | 0.240         | 0.294  | 0.016 | <.001          | 0.236         | 0.284  | 0.016 | <.001          |
| <b>Adolescent variables</b>                |         |        |       |                |         |        |       |                |               |        |       |                |               |        |       |                |
| Age (years)                                |         |        |       |                |         |        |       |                |               |        |       |                |               |        |       |                |
| 12-14                                      | Ref     |        |       |                | Ref     |        |       |                | Ref           |        |       |                | Ref           |        |       |                |
| 15-18                                      | -0.168  | -0.003 | 1.071 | 0.875          | -0.788  | -0.009 | 1.970 | 0.689          | -0.476        | -0.024 | 0.388 | 0.220          | 0.539         | 0.012  | 0.920 | 0.558          |
| Sex                                        |         |        |       |                |         |        |       |                |               |        |       |                |               |        |       |                |
| Male                                       | Ref     |        |       |                | Ref     |        |       |                | Ref           |        |       |                | Ref           |        |       |                |
| Female                                     | 13.317  | 0.246  | 1.035 | <.001          | 1.767   | 0.019  | 1.845 | 0.338          | 2.936         | 0.150  | 0.378 | <.001          | 9.954         | 0.213  | 0.892 | <.001          |
| BMI (%)*                                   |         |        |       |                |         |        |       |                |               |        |       |                |               |        |       |                |
| <85                                        | Ref     |        |       |                | Ref     |        |       |                | Ref           |        |       |                | Ref           |        |       |                |
| ≥85                                        | 10.931  | 0.117  | 1.950 | <.001          | 29.963  | 0.187  | 3.575 | <.001          | -5.514        | -0.163 | 0.563 | <.001          | 10.299        | 0.128  | 1.642 | <.001          |
| Glucose (mg/dl)                            |         |        |       |                |         |        |       |                |               |        |       |                |               |        |       |                |
| ≤100                                       | Ref     |        |       |                | Ref     |        |       |                | Ref           |        |       |                | Ref           |        |       |                |
| >100                                       | 4.240   | 0.033  | 2.743 | 0.122          | 3.483   | 0.016  | 4.322 | 0.420          | 0.448         | 0.010  | 0.817 | 0.583          | 2.768         | 0.025  | 2.334 | 0.236          |
| Stress level                               |         |        |       |                |         |        |       |                |               |        |       |                |               |        |       |                |
| Non                                        | Ref     |        |       |                | Ref     |        |       |                | Ref           |        |       |                | Ref           |        |       |                |
| Mild                                       | -0.117  | -0.002 | 1.370 | 0.932          | 1.583   | 0.017  | 2.229 | 0.477          | 0.521         | 0.026  | 0.459 | 0.256          | -0.979        | -0.021 | 1.206 | 0.417          |
| Moderate                                   | -2.199  | -0.035 | 1.561 | 0.159          | 1.739   | 0.016  | 2.731 | 0.524          | 0.103         | 0.005  | 0.533 | 0.847          | -2.552        | -0.047 | 1.349 | 0.059          |
| Eating out/week                            |         |        |       |                |         |        |       |                |               |        |       |                |               |        |       |                |
| ≥7                                         | Ref     |        |       |                | Ref     |        |       |                | Ref           |        |       |                | Ref           |        |       |                |
| 5-6                                        | 2.599   | 0.047  | 1.025 | 0.011          | 2.939   | 0.031  | 1.763 | 0.096          | 0.107         | 0.005  | 0.374 | 0.775          | 2.030         | 0.043  | 0.896 | 0.024          |
| 1-4                                        | 2.142   | 0.012  | 3.110 | 0.491          | 3.127   | 0.010  | 5.402 | 0.563          | 0.036         | 0.001  | 1.225 | 0.977          | 1.397         | 0.009  | 2.666 | 0.601          |
| <1                                         | 8.908   | 0.028  | 6.882 | 0.196          | 6.660   | 0.012  | 9.111 | 0.465          | -0.848        | -0.007 | 1.800 | 0.638          | 8.283         | 0.030  | 5.553 | 0.136          |
| Walking/week                               |         |        |       |                |         |        |       |                |               |        |       |                |               |        |       |                |
| 0-1 day                                    | Ref     |        |       |                | Ref     |        |       |                | Ref           |        |       |                | Ref           |        |       |                |
| 2-4 days                                   | -1.422  | -0.020 | 1.799 | 0.429          | -0.919  | -0.008 | 3.566 | 0.797          | -0.371        | -0.014 | 0.658 | 0.573          | -0.864        | -0.014 | 1.547 | 0.576          |
| 5-6 days                                   | -1.349  | -0.022 | 1.693 | 0.426          | -1.070  | -0.010 | 3.453 | 0.757          | -0.092        | -0.004 | 0.626 | 0.883          | -1.119        | -0.021 | 1.430 | 0.434          |
| 7 days                                     | -3.466  | -0.064 | 1.554 | 0.026          | -2.035  | -0.022 | 2.291 | 0.536          | -0.021        | -0.001 | 0.594 | 0.971          | -3.143        | -0.067 | 1.316 | 0.017          |
| Exercise/week                              |         |        |       |                |         |        |       |                |               |        |       |                |               |        |       |                |
| Non                                        | Ref     |        |       |                | Ref     |        |       |                | Ref           |        |       |                | Ref           |        |       |                |
| 1-2days                                    | 1.528   | 0.023  | 1.210 | 0.207          | -2.743  | -0.024 | 2.074 | 0.186          | -0.374        | -0.016 | 0.416 | 0.369          | 2.361         | 0.042  | 1.034 | 0.023          |
| ≥3days                                     | 2.992   | 0.038  | 1.476 | 0.043          | -3.400  | -0.025 | 2.544 | 0.182          | 0.939         | 0.033  | 0.527 | 0.075          | 3.018         | 0.045  | 1.305 | 0.021          |
| <b>Mother variables</b>                    |         |        |       |                |         |        |       |                |               |        |       |                |               |        |       |                |
| Age (years)                                |         |        |       |                |         |        |       |                |               |        |       |                |               |        |       |                |
| 30-39                                      | Ref     |        |       |                | Ref     |        |       |                | Ref           |        |       |                | Ref           |        |       |                |



|    |                          |        |        |       |       |        |        |       |       |        |        |       |       |        |        |       |       |
|----|--------------------------|--------|--------|-------|-------|--------|--------|-------|-------|--------|--------|-------|-------|--------|--------|-------|-------|
| 1  |                          |        |        |       |       |        |        |       |       |        |        |       |       |        |        |       |       |
| 2  |                          |        |        |       |       |        |        |       |       |        |        |       |       |        |        |       |       |
| 3  | 40-49                    | -1.270 | -0.020 | 1.302 | 0.329 | -1.716 | -0.016 | 2.364 | 0.468 | -0.972 | -0.043 | 0.478 | 0.042 | 0.046  | 0.001  | 1.106 | 0.967 |
| 4  | 50-59                    | -6.554 | -0.065 | 2.165 | 0.003 | -6.270 | -0.036 | 3.780 | 0.097 | -2.071 | -0.057 | 0.725 | 0.004 | -3.230 | -0.037 | 1.868 | 0.084 |
| 5  | BMI (kg/m <sup>2</sup> ) |        |        |       |       |        |        |       |       |        |        |       |       |        |        |       |       |
| 6  | <23                      | Ref    |        |       |       |
| 7  | 23-24.9                  | -1.637 | -0.026 | 1.159 | 0.158 | -3.390 | -0.031 | 2.034 | 0.096 | 0.175  | 0.008  | 0.425 | 0.680 | -0.849 | -0.016 | 0.994 | 0.393 |
| 8  | ≥25                      | -2.467 | -0.040 | 1.221 | 0.043 | -4.209 | -0.040 | 2.297 | 0.067 | 0.612  | 0.028  | 0.448 | 0.172 | -1.513 | -0.029 | 1.073 | 0.159 |
| 9  | Smoking status           |        |        |       |       |        |        |       |       |        |        |       |       |        |        |       |       |
| 10 | Non                      | Ref    |        |       |       |
| 11 | Ex-Current               | 1.855  | 0.015  | 2.321 | 0.424 | -2.802 | -0.013 | 3.551 | 0.430 | -1.544 | -0.035 | 0.825 | 0.062 | 4.246  | 0.040  | 1.944 | 0.029 |
| 12 | Drinking status          |        |        |       |       |        |        |       |       |        |        |       |       |        |        |       |       |
| 13 | Non                      | Ref    |        |       |       |
| 14 | ≤1/month                 | 0.056  | 0.001  | 1.306 | 0.966 | 2.098  | 0.021  | 2.282 | 0.358 | -1.724 | -0.082 | 0.469 | <.001 | 1.168  | 0.023  | 1.112 | 0.294 |
| 15 | ≥2/month                 | -0.014 | 0.000  | 1.205 | 0.991 | 0.417  | 0.004  | 2.146 | 0.846 | -0.928 | -0.047 | 0.427 | 0.030 | 0.757  | 0.016  | 1.037 | 0.466 |
| 16 | Education level          |        |        |       |       |        |        |       |       |        |        |       |       |        |        |       |       |
| 17 | Elementary               | Ref    |        |       |       |
| 18 | Middle                   | 1.689  | 0.015  | 3.314 | 0.610 | 1.770  | 0.009  | 5.778 | 0.759 | -0.154 | -0.004 | 1.245 | 0.901 | 1.228  | 0.013  | 2.898 | 0.672 |
| 19 | High                     | -0.329 | -0.006 | 2.822 | 0.907 | 1.296  | 0.014  | 5.062 | 0.798 | -0.414 | -0.021 | 1.106 | 0.709 | -0.355 | -0.008 | 2.505 | 0.887 |
| 20 | University               | -1.680 | -0.029 | 2.911 | 0.564 | -1.693 | -0.017 | 5.212 | 0.745 | -0.299 | -0.015 | 1.037 | 0.792 | -1.301 | -0.026 | 2.565 | 0.612 |
| 21 | Income (1,000\)          |        |        |       |       |        |        |       |       |        |        |       |       |        |        |       |       |
| 22 | <1,000                   | Ref    |        |       |       |
| 23 | 1,000-1,999              | -1.700 | -0.027 | 2.010 | 0.398 | -1.408 | -0.013 | 3.858 | 0.715 | -0.460 | -0.020 | 0.727 | 0.527 | -0.964 | -0.018 | 1.710 | 0.573 |
| 24 | 2,000-2,999              | 0.419  | 0.007  | 1.976 | 0.832 | -1.328 | -0.014 | 3.682 | 0.718 | 0.105  | 0.005  | 0.715 | 0.883 | 0.485  | 0.010  | 1.685 | 0.773 |
| 25 | ≥3,000                   | 0.821  | 0.014  | 2.030 | 0.686 | -1.818 | -0.019 | 3.697 | 0.623 | 0.076  | 0.004  | 0.729 | 0.918 | 0.994  | 0.020  | 1.726 | 0.565 |
| 26 | Working hours            |        |        |       |       |        |        |       |       |        |        |       |       |        |        |       |       |
| 27 | Non                      | Ref    |        |       |       |
| 28 | Full-time                | 0.834  | 0.014  | 1.159 | 0.472 | 3.312  | 0.033  | 2.202 | 0.133 | 0.206  | 0.010  | 0.421 | 0.625 | -0.150 | -0.003 | 0.999 | 0.881 |
| 29 | Part time                | 0.279  | 0.003  | 1.592 | 0.861 | 0.496  | 0.003  | 2.649 | 0.852 | 0.008  | 0.000  | 0.598 | 0.990 | 0.068  | 0.001  | 1.330 | 0.959 |
| 30 | Eating out/week          |        |        |       |       |        |        |       |       |        |        |       |       |        |        |       |       |
| 31 | ≥7                       | Ref    |        |       |       |
| 32 | 5-6                      | 1.637  | 0.025  | 1.754 | 0.351 | 3.492  | 0.031  | 2.735 | 0.202 | -0.868 | -0.036 | 0.605 | 0.152 | 1.868  | 0.033  | 1.583 | 0.238 |
| 33 | 1-4                      | 0.539  | 0.010  | 1.615 | 0.739 | 3.111  | 0.033  | 2.646 | 0.240 | -0.372 | -0.019 | 0.572 | 0.516 | 0.374  | 0.008  | 1.463 | 0.798 |
| 34 | <1                       | 1.652  | 0.025  | 1.763 | 0.349 | 4.206  | 0.037  | 3.188 | 0.187 | -0.119 | -0.005 | 0.630 | 0.850 | 1.088  | 0.019  | 1.600 | 0.496 |

\*Based on body mass index (kg/m<sup>2</sup>) for age percentiles in male and female

BMI, body mass index; HDL-C, high-density lipoprotein cholesterol; LDL-C, low-density lipoprotein cholesterol; SD, standard deviation; S.B., standardized beta; S.E., standard error; TC, total cholesterol; TG, triglyceride.

**Table 3** Subgroup analyses based on sex and mother characteristics

|                         |                          | TC & TC     |       |       |                | TG & TG   |       |       |                | HDL-C & HDL-C |       |       |                | LDL-C & LDL-C |       |       |                |       |
|-------------------------|--------------------------|-------------|-------|-------|----------------|-----------|-------|-------|----------------|---------------|-------|-------|----------------|---------------|-------|-------|----------------|-------|
|                         |                          | $\beta^*$   | S.B.  | S.E.  | <i>P</i> value | $\beta^*$ | S.B.  | S.E.  | <i>P</i> value | $\beta^*$     | S.B.  | S.E.  | <i>P</i> value | $\beta^*$     | S.B.  | S.E.  | <i>P</i> value |       |
| Sex                     |                          |             |       |       |                |           |       |       |                |               |       |       |                |               |       |       |                |       |
|                         | Male                     | 1522 (52.8) | 0.221 | 0.258 | 0.021          | <.001     | 0.199 | 0.245 | 0.021          | <.001         | 0.215 | 0.273 | 0.020          | <.001         | 0.228 | 0.274 | 0.021          | <.001 |
|                         | Female                   | 1362 (47.2) | 0.244 | 0.299 | 1.510          | <.001     | 0.122 | 0.181 | 0.020          | <.001         | 0.271 | 0.331 | 0.022          | <.001         | 0.250 | 0.312 | 0.021          | <.001 |
| <b>Mother variables</b> |                          |             |       |       |                |           |       |       |                |               |       |       |                |               |       |       |                |       |
|                         | Age (years)              |             |       |       |                |           |       |       |                |               |       |       |                |               |       |       |                |       |
|                         | 30-39                    | 505 (17.5)  | 0.228 | 0.274 | 0.036          | <.001     | 0.150 | 0.186 | 0.040          | <.001         | 0.224 | 0.278 | 0.038          | <.001         | 0.247 | 0.315 | 0.035          | <.001 |
|                         | 40-49                    | 2154 (74.7) | 0.239 | 0.273 | 0.018          | <.001     | 0.164 | 0.210 | 0.017          | <.001         | 0.250 | 0.302 | 0.018          | <.001         | 0.250 | 0.292 | 0.018          | <.001 |
|                         | 50-59                    | 225 (7.8)   | 0.099 | 0.127 | 0.053          | 0.062     | 0.157 | 0.291 | 0.039          | <.001         | 0.207 | 0.287 | 0.051          | <.001         | 0.058 | 0.081 | 0.048          | 0.230 |
|                         | BMI (kg/m <sup>2</sup> ) |             |       |       |                |           |       |       |                |               |       |       |                |               |       |       |                |       |
|                         | <25                      | 2114 (73.3) | 0.249 | 0.288 | 0.018          | <.001     | 0.185 | 0.221 | 0.018          | <.001         | 0.250 | 0.313 | 0.017          | <.001         | 0.265 | 0.315 | 0.017          | <.001 |
|                         | ≥25                      | 770 (26.7)  | 0.172 | 0.202 | 0.030          | <.001     | 0.129 | 0.183 | 0.025          | <.001         | 0.180 | 0.189 | 0.034          | <.001         | 0.168 | 0.203 | 0.030          | <.001 |
|                         | Education level          |             |       |       |                |           |       |       |                |               |       |       |                |               |       |       |                |       |
|                         | Elementary               | 96 (3.3)    | 0.154 | 0.185 | 0.111          | 0.171     | 0.212 | 0.287 | 0.105          | 0.047         | 0.056 | 0.064 | 0.110          | 0.616         | 0.136 | 0.185 | 0.098          | 0.171 |
|                         | Middle                   | 177 (6.1)   | 0.222 | 0.240 | 0.073          | 0.003     | 0.241 | 0.055 | 0.379          | <.001         | 0.133 | 0.187 | 0.060          | 0.028         | 0.279 | 0.316 | 0.065          | <.001 |
|                         | High                     | 1624 (56.3) | 0.226 | 0.264 | 0.021          | <.001     | 0.141 | 0.190 | 0.019          | <.001         | 0.257 | 0.314 | 0.020          | <.001         | 0.226 | 0.268 | 0.021          | <.001 |
|                         | University               | 987 (34.2)  | 0.233 | 0.278 | 0.026          | <.001     | 0.174 | 0.209 | 0.028          | <.001         | 0.247 | 0.296 | 0.027          | <.001         | 0.253 | 0.314 | 0.025          | <.001 |
|                         | Dyslipidemia†            |             |       |       |                |           |       |       |                |               |       |       |                |               |       |       |                |       |
|                         | No                       | 2587 (89.7) | 0.259 | 0.257 | 0.019          | <.001     | 0.190 | 0.232 | 0.017          | <.001         | 0.255 | 0.305 | 0.016          | <.001         | 0.263 | 0.273 | 0.018          | <.001 |
|                         | Yes                      | 297 (10.3)  | 0.121 | 0.182 | 0.040          | 0.003     | 0.096 | 0.189 | 0.032          | 0.003         | 0.151 | 0.222 | 0.045          | 0.001         | 0.137 | 0.224 | 0.035          | <.001 |
|                         | Economic activity        |             |       |       |                |           |       |       |                |               |       |       |                |               |       |       |                |       |
|                         | No                       | 1679 (58.2) | 0.202 | 0.240 | 0.020          | <.001     | 0.186 | 0.251 | 0.019          | <.001         | 0.258 | 0.325 | 0.019          | <.001         | 0.205 | 0.250 | 0.019          | <.001 |
|                         | Yes                      | 1205 (41.8) | 0.267 | 0.308 | 0.024          | <.001     | 0.121 | 0.159 | 0.024          | <.001         | 0.214 | 0.251 | 0.025          | <.001         | 0.280 | 0.332 | 0.023          | <.001 |

The other covariates were adjusted for these regressions.

\*An amount change in adolescents' lipid levels by each unit increase of their mothers' lipids

†Included cases diagnosed and/or treated with dyslipidemia, and cases with cholesterol level above 240mg/dl.

BMI, body mass index; HDL-C, high-density lipoprotein cholesterol; LDL-C, low-density lipoprotein cholesterol; SD, standard deviation; S.B., standardized beta; S.E., standard error; TC, total cholesterol; TG, triglyceride.

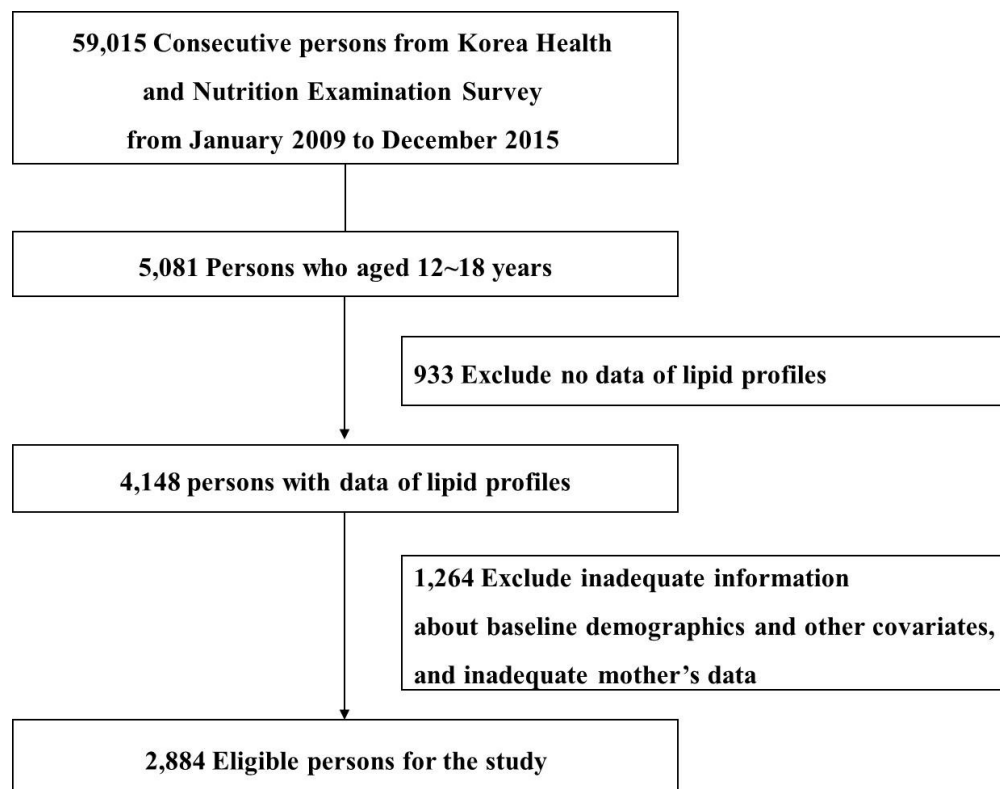

34 Figure 1 Study flow showing sample selection. We selected 2,884 adolescents aged 12–18 whose mothers'  
35 data were also available.

36  
37 104x90mm (300 x 300 DPI)

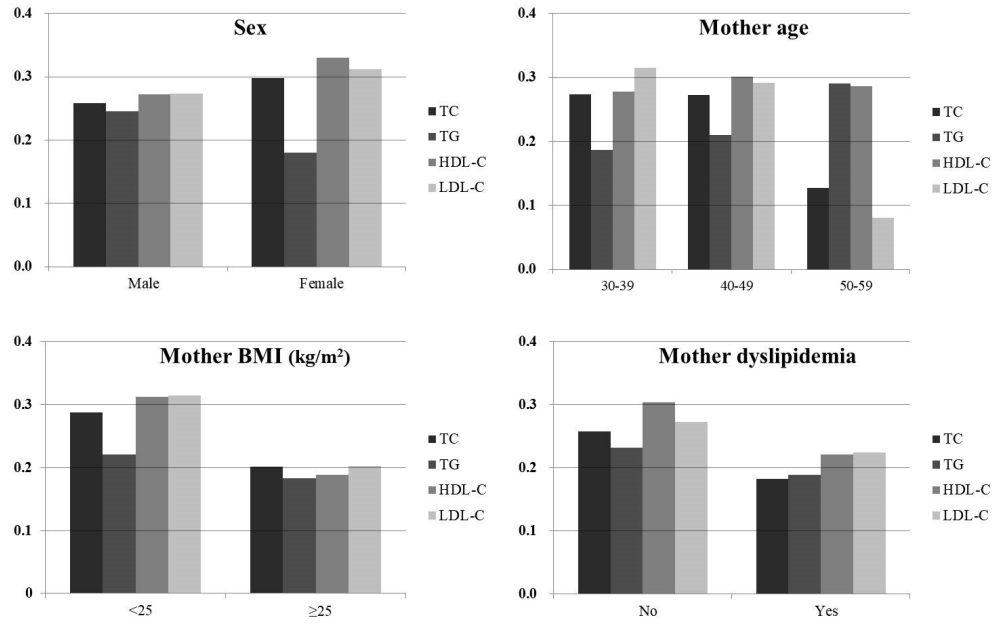

Figure 2 Bar graphs showing standardized beta coefficients of adolescent's lipids for each unit increase of their mother's lipids in subgroups. HDL-C, high-density lipoprotein cholesterol; LDL-C, low-density lipoprotein cholesterol; TC, total cholesterol; TG, triglyceride.

124x90mm (300 x 300 DPI)

TC

*P*<.0001

TG

*P*<.0001

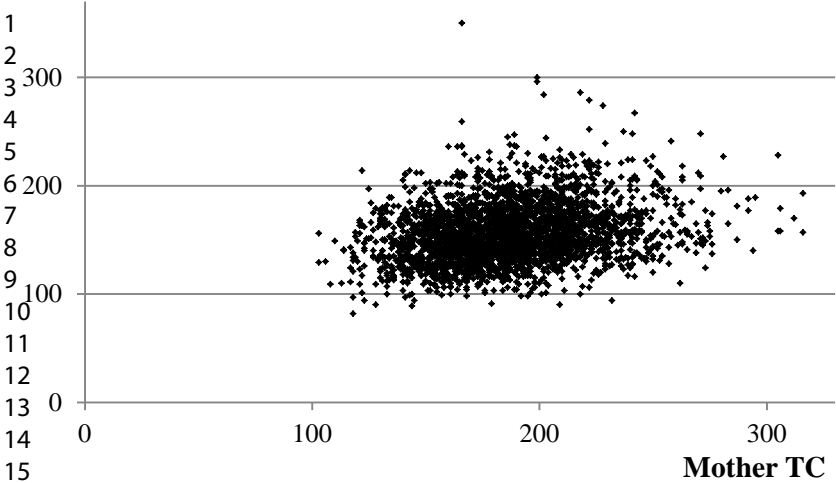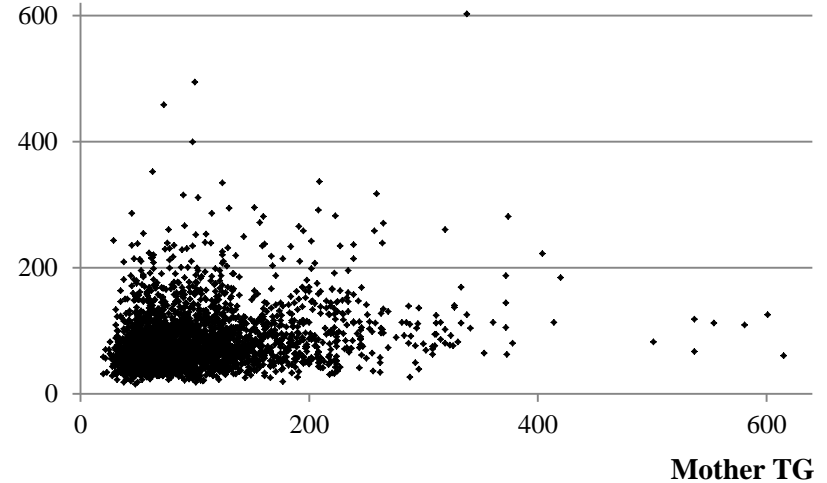

HDL-C

*P*<.0001

LDL-C

*P*<.0001

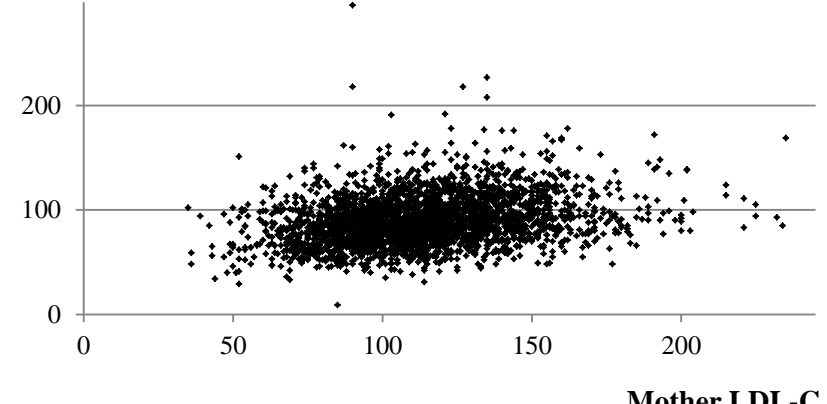

**Supplementary Figure S1** Dot plots of correlations between adolescent's and mother's lipids.

HDL-C, high-density lipoprotein cholesterol; LDL-C, low-density lipoprotein cholesterol; TC, total cholesterol; TG, triglyceride.

1  
2  
3  
4  
5  
6  
7  
8  
9  
10  
11  
12  
13  
14  
15  
16  
17  
18  
19  
20  
21  
22  
23  
24  
25  
26  
27  
28  
29  
30  
31  
32  
33  
34  
35  
36  
37  
38  
39  
40  
41  
42  
43  
44  
45  
46  
47

**Supplementary Table S1** Adjusted R squares for regression models of lipid profiles between adolescent and mother

| Adjusted R <sup>2</sup> |       | Adolescents   |               |               |               |
|-------------------------|-------|---------------|---------------|---------------|---------------|
|                         |       | TC            | TG            | HDL-C         | LDL-C         |
| Mothers                 | TC    | <b>0.1245</b> | 0.0296        | 0.0723        | 0.1095        |
|                         | TG    | 0.0585        | <b>0.0692</b> | 0.0678        | 0.0445        |
|                         | HDL-C | 0.0592        | 0.0424        | <b>0.1400</b> | 0.0442        |
|                         | LDL-C | 0.1164        | 0.0288        | 0.0640        | <b>0.1218</b> |

The other covariates were adjusted for these regressions.

HDL-C, high-density lipoprotein cholesterol; LDL-C, low-density lipoprotein cholesterol; TC, total cholesterol; TG, triglyceride.

For peer review only

**Supplementary Table S2** Adjusted odds ratios for risks of adolescents' dyslipidemia based on mothers' lipids

|                 |               | Adolescents' lipids |             | OR         | 95% CI     | P value    |       |
|-----------------|---------------|---------------------|-------------|------------|------------|------------|-------|
| Mothers' lipids | TG (mg/dl)    | ≤150                | >150        |            |            |            |       |
|                 |               | ≤150                | 2266 (84.9) | 157 (73.0) | ref        |            |       |
|                 |               | >150                | 403 (15.1)  | 58 (27.0)  | 2.15       | 1.52, 3.03 | <.001 |
|                 | LDL-C (mg/dl) | ≤150                | >150        |            |            |            |       |
|                 |               | ≤150                | 2581 (90.8) | 31 (72.1)  | ref        |            |       |
|                 |               | >150                | 260 (9.2)   | 12 (27.9)  | 3.42       | 1.68, 7.00 | <.001 |
|                 | HDL-C (mg/dl) | <40                 | ≥40         |            |            |            |       |
|                 |               | <40                 | 84 (22.0)   | 215 (8.6)  | ref        |            |       |
|                 | ≥40           | 298 (78.0)          | 2287 (91.4) | 0.33       | 0.24, 0.44 | <.001      |       |

The other covariates (baseline and clinical characteristics, health behavioral factors) were adjusted for these regressions

CI, confidence interval; HDL-C, high-density lipoprotein cholesterol; LDL-C, low-density lipoprotein cholesterol; OR, odds ratio; TG, triglyceride.

**Supplementary Table S3** Sensitivity test: Demographics and lipid profiles in 4,148 adolescents\* aged 12-18 years

|                 | No. (%)     | TC    |      |                             | TG    |      |                             | HDL-C <sup>†</sup> |      |                             | LDL-C <sup>§</sup> |      |                             |
|-----------------|-------------|-------|------|-----------------------------|-------|------|-----------------------------|--------------------|------|-----------------------------|--------------------|------|-----------------------------|
|                 |             | Mean  | SD   | <i>P</i> value <sup>†</sup> | Mean  | SD   | <i>P</i> value <sup>†</sup> | Mean               | SD   | <i>P</i> value <sup>†</sup> | Mean               | SD   | <i>P</i> value <sup>†</sup> |
| All (n=4148)    |             | 156.5 | 26.9 |                             | 83.9  | 47.0 |                             | 50.3               | 9.8  |                             | 89.5               | 23.1 |                             |
| Age (years)     |             |       |      | 0.252                       |       |      | 0.459                       |                    |      | 0.013                       |                    |      | 0.996                       |
| 12-14           | 1959 (47.2) | 156.9 | 26.4 |                             | 84.9  | 48.0 |                             | 50.7               | 9.7  |                             | 89.4               | 22.8 |                             |
| 15-18           | 2189 (52.8) | 156.2 | 27.3 |                             | 83.0  | 46.1 |                             | 49.9               | 9.8  |                             | 89.6               | 23.4 |                             |
| Sex             |             |       |      | <.001                       |       |      | 0.313                       |                    |      | <.001                       |                    |      | <.001                       |
| Male            | 2215 (53.4) | 151.4 | 26.8 |                             | 84.5  | 50.1 |                             | 48.6               | 9.4  |                             | 86.0               | 23.1 |                             |
| Female          | 1933 (46.6) | 162.4 | 25.8 |                             | 83.3  | 43.2 |                             | 52.3               | 9.8  |                             | 93.4               | 22.4 |                             |
| BMI*            |             |       |      | 0.024                       |       |      | <.001                       |                    |      | <.001                       |                    |      | <.001                       |
| <85%            | 3733 (90.0) | 156.0 | 26.5 |                             | 81.1  | 44.9 |                             | 51.0               | 9.7  |                             | 88.8               | 22.7 |                             |
| ≥85%            | 415 (10.0)  | 160.9 | 30.3 |                             | 108.8 | 57.1 |                             | 44.1               | 7.9  |                             | 95.0               | 26.0 |                             |
| Glucose (mg/dl) |             |       |      | 0.166                       |       |      | 0.134                       |                    |      | 0.765                       |                    |      | 0.142                       |
| ≤100            | 3935 (94.9) | 156.3 | 26.6 |                             | 83.5  | 46.7 |                             | 50.3               | 9.7  |                             | 89.3               | 22.8 |                             |
| >100            | 213 (5.1)   | 160.0 | 32.5 |                             | 90.4  | 52.7 |                             | 50.2               | 10.2 |                             | 92.8               | 27.9 |                             |

\*Included 1264 adolescents who have no mothers' data or inadequate baseline information

<sup>†</sup>P values determined by log normal distributions

<sup>‡</sup>Included 42 missing data (n=4106)

<sup>§</sup>Included 43 missing data (n=4105)

BMI, body mass index; HDL-C, high-density lipoprotein cholesterol; LDL-C, low-density lipoprotein cholesterol; SD, standard deviation; TC, total cholesterol; TG, triglyceride.



**STROBE 2007 (v4) Statement—Checklist of items that should be included in reports of *cross-sectional studies***

| Section/Topic                | Item # | Recommendation                                                                                                                                                                       | Reported on page # |
|------------------------------|--------|--------------------------------------------------------------------------------------------------------------------------------------------------------------------------------------|--------------------|
| <b>Title and abstract</b>    | 1      | (a) Indicate the study's design with a commonly used term in the title or the abstract                                                                                               | #1, #2             |
|                              |        | (b) Provide in the abstract an informative and balanced summary of what was done and what was found                                                                                  | #2, #3, #4         |
| <b>Introduction</b>          |        |                                                                                                                                                                                      |                    |
| Background/rationale         | 2      | Explain the scientific background and rationale for the investigation being reported                                                                                                 | #5                 |
| Objectives                   | 3      | State specific objectives, including any prespecified hypotheses                                                                                                                     | #5, #6             |
| <b>Methods</b>               |        |                                                                                                                                                                                      |                    |
| Study design                 | 4      | Present key elements of study design early in the paper                                                                                                                              | #6                 |
| Setting                      | 5      | Describe the setting, locations, and relevant dates, including periods of recruitment, exposure, follow-up, and data collection                                                      | #6, #7             |
| Participants                 | 6      | (a) Give the eligibility criteria, and the sources and methods of selection of participants                                                                                          | #6                 |
| Variables                    | 7      | Clearly define all outcomes, exposures, predictors, potential confounders, and effect modifiers. Give diagnostic criteria, if applicable                                             | #6, #7             |
| Data sources/<br>measurement | 8*     | For each variable of interest, give sources of data and details of methods of assessment (measurement). Describe comparability of assessment methods if there is more than one group | #7                 |
| Bias                         | 9      | Describe any efforts to address potential sources of bias                                                                                                                            | #7, #8             |
| Study size                   | 10     | Explain how the study size was arrived at                                                                                                                                            | #6                 |
| Quantitative variables       | 11     | Explain how quantitative variables were handled in the analyses. If applicable, describe which groupings were chosen and why                                                         | #7, #8             |
| Statistical methods          | 12     | (a) Describe all statistical methods, including those used to control for confounding                                                                                                | #7, #8             |
|                              |        | (b) Describe any methods used to examine subgroups and interactions                                                                                                                  | #8                 |
|                              |        | (c) Explain how missing data were addressed                                                                                                                                          | #6                 |
|                              |        | (d) If applicable, describe analytical methods taking account of sampling strategy                                                                                                   | #8                 |
|                              |        | (e) Describe any sensitivity analyses                                                                                                                                                | #8                 |
| <b>Results</b>               |        |                                                                                                                                                                                      |                    |

|                          |     |                                                                                                                                                                                                              |                    |
|--------------------------|-----|--------------------------------------------------------------------------------------------------------------------------------------------------------------------------------------------------------------|--------------------|
| Participants             | 13* | (a) Report numbers of individuals at each stage of study—eg numbers potentially eligible, examined for eligibility, confirmed eligible, included in the study, completing follow-up, and analysed            | #6                 |
|                          |     | (b) Give reasons for non-participation at each stage                                                                                                                                                         | #6                 |
|                          |     | (c) Consider use of a flow diagram                                                                                                                                                                           | #6                 |
| Descriptive data         | 14* | (a) Give characteristics of study participants (eg demographic, clinical, social) and information on exposures and potential confounders                                                                     | #8, #9             |
|                          |     | (b) Indicate number of participants with missing data for each variable of interest                                                                                                                          | #6                 |
| Outcome data             | 15* | Report numbers of outcome events or summary measures                                                                                                                                                         | #8                 |
| Main results             | 16  | (a) Give unadjusted estimates and, if applicable, confounder-adjusted estimates and their precision (eg, 95% confidence interval). Make clear which confounders were adjusted for and why they were included | #8, #9, #10        |
|                          |     | (b) Report category boundaries when continuous variables were categorized                                                                                                                                    | #7                 |
|                          |     | (c) If relevant, consider translating estimates of relative risk into absolute risk for a meaningful time period                                                                                             | #9, #10            |
| Other analyses           | 17  | Report other analyses done—eg analyses of subgroups and interactions, and sensitivity analyses                                                                                                               | #10, #11           |
| <b>Discussion</b>        |     |                                                                                                                                                                                                              |                    |
| Key results              | 18  | Summarise key results with reference to study objectives                                                                                                                                                     | #11                |
| Limitations              | 19  | Discuss limitations of the study, taking into account sources of potential bias or imprecision. Discuss both direction and magnitude of any potential bias                                                   | #14, #15           |
| Interpretation           | 20  | Give a cautious overall interpretation of results considering objectives, limitations, multiplicity of analyses, results from similar studies, and other relevant evidence                                   | #11, #12, #13, #14 |
| Generalisability         | 21  | Discuss the generalisability (external validity) of the study results                                                                                                                                        | #11                |
| <b>Other information</b> |     |                                                                                                                                                                                                              |                    |
| Funding                  | 22  | Give the source of funding and the role of the funders for the present study and, if applicable, for the original study on which the present article is based                                                | #15                |

\*Give information separately for cases and controls in case-control studies and, if applicable, for exposed and unexposed groups in cohort and cross-sectional studies.

**Note:** An Explanation and Elaboration article discusses each checklist item and gives methodological background and published examples of transparent reporting. The STROBE checklist is best used in conjunction with this article (freely available on the Web sites of PLoS Medicine at <http://www.plosmedicine.org/>, Annals of Internal Medicine at <http://www.annals.org/>, and Epidemiology at <http://www.epidem.com/>). Information on the STROBE Initiative is available at [www.strobe-statement.org](http://www.strobe-statement.org).

# BMJ Open

## Associations between lipid profiles of adolescents and their mothers based on a nationwide health and nutrition survey in South Korea

|                                 |                                                                                                                                                                                                                                                                                                                                                                                                                                                                                                                                                                                                                                                                                                                                                                                                                                                                                                                                                                                                                                              |
|---------------------------------|----------------------------------------------------------------------------------------------------------------------------------------------------------------------------------------------------------------------------------------------------------------------------------------------------------------------------------------------------------------------------------------------------------------------------------------------------------------------------------------------------------------------------------------------------------------------------------------------------------------------------------------------------------------------------------------------------------------------------------------------------------------------------------------------------------------------------------------------------------------------------------------------------------------------------------------------------------------------------------------------------------------------------------------------|
| Journal:                        | <i>BMJ Open</i>                                                                                                                                                                                                                                                                                                                                                                                                                                                                                                                                                                                                                                                                                                                                                                                                                                                                                                                                                                                                                              |
| Manuscript ID                   | bmjopen-2018-024731.R2                                                                                                                                                                                                                                                                                                                                                                                                                                                                                                                                                                                                                                                                                                                                                                                                                                                                                                                                                                                                                       |
| Article Type:                   | Research                                                                                                                                                                                                                                                                                                                                                                                                                                                                                                                                                                                                                                                                                                                                                                                                                                                                                                                                                                                                                                     |
| Date Submitted by the Author:   | 30-Dec-2018                                                                                                                                                                                                                                                                                                                                                                                                                                                                                                                                                                                                                                                                                                                                                                                                                                                                                                                                                                                                                                  |
| Complete List of Authors:       | Nam, Ji Hyung; Department of Internal Medicine, Dongguk University Ilsan Hospital, Dongguk University College of Medicine; Department of Medicine, Graduate School, Yonsei University<br>Shin, Jaeyong ; Department of Preventive Medicine & Institute of Health Services Research, Yonsei University College of Medicine<br>Jang, Sung-In; College of Medicine Yonsei University, Department of Preventive Medicine<br>Kim, Ji Hyun ; Department of Pediatrics, Dongguk University Ilsan Hospital, Dongguk University College of Medicine<br>Han, Kyu-Tae ; Research and Analysis Team, National Health Insurance Service Ilsan Hospital<br>Lee, Jun Kyu ; Department of Internal Medicine, Dongguk University Ilsan Hospital, Dongguk University College of Medicine<br>Lim, Yun Jeong ; Department of Internal Medicine, Dongguk University Ilsan Hospital, Dongguk University College of Medicine<br>Park, Eun-Cheol; Yonsei University College of Medicine, Department of Preventive Medicine and Institute of Health Services Research |
| <b>Primary Subject Heading</b>: | Public health                                                                                                                                                                                                                                                                                                                                                                                                                                                                                                                                                                                                                                                                                                                                                                                                                                                                                                                                                                                                                                |
| Secondary Subject Heading:      | Paediatrics                                                                                                                                                                                                                                                                                                                                                                                                                                                                                                                                                                                                                                                                                                                                                                                                                                                                                                                                                                                                                                  |
| Keywords:                       | Dyslipidemia, Cholesterol, Lipids, Adolescent, Mother                                                                                                                                                                                                                                                                                                                                                                                                                                                                                                                                                                                                                                                                                                                                                                                                                                                                                                                                                                                        |
|                                 |                                                                                                                                                                                                                                                                                                                                                                                                                                                                                                                                                                                                                                                                                                                                                                                                                                                                                                                                                                                                                                              |

SCHOLARONE™  
Manuscripts

1  
2  
3  
4 1 **Associations between lipid profiles of adolescents and their mothers based**  
5  
6 2 **on a nationwide health and nutrition survey in South Korea**  
7  
8  
9 3

10  
11 4 Ji Hyung Nam,<sup>1,2</sup> Jaeyong Shin,<sup>3</sup> Sung-In Jang,<sup>3</sup> Ji Hyun Kim,<sup>4</sup> Kyu-Tae Han,<sup>5</sup> Jun Kyu Lee,<sup>1</sup>  
12  
13 5 Yun Jeong Lim,<sup>1</sup> Eun-Cheol Park<sup>3</sup>  
14  
15 6

16  
17  
18 7 <sup>1</sup> Department of Internal Medicine, Dongguk University Ilsan Hospital, Dongguk University  
19  
20 8 College of Medicine, Goyang, Republic of Korea

21  
22 9 <sup>2</sup> Department of Medicine, Graduate School, Yonsei University, Seoul, Republic of Korea

23  
24  
25 10 <sup>3</sup> Department of Preventive Medicine & Institute of Health Services Research, Yonsei  
26  
27 11 University College of Medicine, Seoul, Republic of Korea

28  
29 12 <sup>4</sup> Department of Pediatrics, Dongguk University Ilsan Hospital, Dongguk University College  
30  
31 13 of Medicine, Goyang, Republic of Korea

32  
33  
34 14 <sup>5</sup> Research and Analysis Team, National Health Insurance Service Ilsan Hospital, Goyang,  
35  
36 15 Republic of Korea

37  
38  
39 16  
40  
41 17 Correspondence to

42  
43 18 Eun-Cheol Park, MD, PhD

44  
45 19 Department of Preventive Medicine & Institute of Health Services Research

46  
47 20 Yonsei University College of Medicine

48  
49 21 50-1 Yonsei-ro, Seodaemun-gu, Seoul, 03722, Republic of Korea

50  
51  
52 22 Phone number: 82-2-2228-1862 / Fax number: 82-2-392-8133

53  
54 23 E-mail: [ecpark@yuhs.ac](mailto:ecpark@yuhs.ac)  
55  
56  
57 24  
58  
59 25  
60

## 26 ABSTRACT

27 **Objectives** Dyslipidemia is a metabolic disease influenced by environmental and genetic  
28 factors. Especially family history related to the genetic backgrounds is a strong risk factor of  
29 lipid abnormality. The aim of this study is to evaluate the association between the lipid  
30 profiles of adolescents and their mothers.

31 **Design** A cross-sectional study.

32 **Setting** The data were derived from the Korea National Health and Nutrition Examination  
33 Survey (KNHANES IV-VI) between 2009 and 2015.

34 **Participants** 2,884 adolescents aged 12-18 years and their mothers were included.

35 **Primary outcome measures** Outcome variables were adolescents' lipid levels. Mothers'  
36 lipid levels were interesting variables. The lipid profiles included total cholesterol (TC),  
37 triglyceride (TG), high-density lipoprotein cholesterol (HDL-C), and low-density lipoprotein  
38 cholesterol (LDL-C). We identified partial correlation coefficients ( $r$ ) between the lipids.  
39 Multiple linear regressions were performed to identify an amount change in adolescents' lipid  
40 levels by each unit increase of their mothers' lipids. The regression models included various  
41 clinical characteristics and health behavioral factors of both adolescents and mothers.

42 **Results** The mean levels of adolescents' lipids were 156.6, 83.6, 50.4, and 89.4 mg/dL,  
43 respectively for TC, TG, HDL-C, and LDL-C. Positive correlations between lipid levels of  
44 adolescents and mothers were observed for TC, TG, HDL-C, and LDL-C ( $r$ , 95% confidence  
45 interval = 0.271, 0.236–0.304; 0.204, 0.169–0.239; 0.289, 0.255–0.322; and 0.286, 0.252–  
46 0.319). Adolescent TC level was increased by 0.23 mg/dL for each unit increase of their  
47 mother's TC (standard error (SE), 0.02;  $P < .001$ ). The  $\beta$  coefficients were 0.16 (SE, 0.01),  
48 0.24 (SE, 0.02), and 0.24 (SE, 0.02), respectively, in each model of TG, HDL-C, and LDL-C  
49 (all  $P < .001$ ). The linear relationships were significant regardless of sex and mother  
50 characteristics.

1  
2  
3  
4  
5  
6  
7  
8  
9  
10  
11  
12  
13  
14  
15  
16  
17  
18  
19  
20  
21  
22  
23  
24  
25  
26  
27  
28  
29  
30  
31  
32  
33  
34  
35  
36  
37  
38  
39  
40  
41  
42  
43  
44  
45  
46  
47  
48  
49  
50  
51  
52  
53  
54  
55  
56  
57  
58  
59  
60

51 **Conclusions** Mothers' lipid levels are associated with adolescents' lipids, therefore, it can  
52 serve as a reference for the screening of adolescent's dyslipidemia.

53 **Keywords:** Dyslipidemia, Cholesterol, Lipids, Adolescent, Mother.

For peer review only

1  
2  
3 76 **Strengths and limitations of this study**  
4

5 77 ▶This study analyzed linear relationships of lipid profiles between adolescents and their  
6  
7  
8 78 mothers using a large national database.  
9

10 79 ▶We used survey based statistical analyses based on the design effect related to survey  
11  
12 80 sampling.  
13

14  
15 81 ▶Various health behavioral factors of adolescents and mothers were adjusted.  
16

17 82 ▶There is no causal relationship as this was a cross-sectional study.  
18

19 83 ▶The study did not provide any information on nutritional factors which could be significant  
20  
21 84 confounders.  
22  
23

24 85  
25

26 86  
27

28 87  
29

30 88  
31

32 89  
33

34 90  
35

36 91  
37

38 92  
39

40 93  
41

42 94  
43

44 95  
45

46 96  
47

48 97  
49

50 98  
51

52 99  
53

54 100  
55  
56  
57  
58  
59  
60

## 101 INTRODUCTION

102 Dyslipidemia is a well-known risk factor for cardiovascular disease (CVD) in individuals of  
103 all ages.<sup>1</sup> In Korea, CVD is the second-leading cause of death after cancer.<sup>2</sup> Triglyceride  
104 (TG) and high-density lipoprotein cholesterol (HDL-C) are major components of metabolic  
105 syndrome (MetS). Likewise, the TG to HDL-C ratio, a predictor for small dense low-density  
106 lipoprotein cholesterol (LDL-C), is an independent determinant of arterial stiffness in  
107 adolescents and young adult,<sup>3</sup> which can subsequently accelerate atherosclerosis and increase  
108 cardiovascular events in the second decade of life.<sup>4</sup> Meanwhile, lipid level is strongly linked  
109 to the body mass index (BMI), which is one of the reliable indicators for obesity in  
110 adolescents.<sup>5</sup> Pediatric obesity is affected by various family settings such as eating habits,  
111 lifestyle, and education.<sup>6</sup> The prevalence of pediatric obesity in South Korea has been  
112 increased rapidly from 5.8% in 1997 to 11.5% in 201,<sup>7</sup> which is close to the 13.3% in the  
113 United States.<sup>8</sup> This has increased interest in obesity-related disorders in adolescence, such as  
114 metabolic, cardiovascular, or psychosocial complication.<sup>9</sup> Obesity and dyslipidemia is no  
115 longer the problem of adults alone, therefore, adequate screening and control of dyslipidemia  
116 in adolescence has become important in South Korea.

117  
118 In addition to obesity, various factors such as physical activity, economic status, education  
119 level, nutritional and dietary factors, sleep duration, and psychiatric problems, among others,  
120 have been associated with lipid concentration.<sup>10-12</sup> Meanwhile, family histories usually  
121 provide important information regarding pediatric diseases.<sup>13</sup> Regarding the highly heritable  
122 traits of dyslipidemia, several studies showed that there was a close relationship in the lipid  
123 concentration between parents and their offspring.<sup>14-16</sup> This familial clustering implies that  
124 there may be common denominators including health behavioral factors within a family as  
125 well as genetic backgrounds. In the present study, we investigated clinical and health



1  
2  
3 126 behavioral factors affecting adolescents' lipid levels, and evaluated the association between  
4  
5 127 the lipid profiles of adolescents and their mothers.  
6  
7  
8 128

## 10 129 **METHODS**

### 13 130 **Data source**

15 131 This is a cross-sectional study using a secondary data of the Korea National Health and  
16  
17 132 Nutrition Examination Survey (KNHANES). KNHANES is an ongoing surveillance system  
18  
19 133 conducted by Korea Centers for Disease Control and Prevention (KCDC) since 1998 that  
20  
21 134 assesses health and nutrition status, and monitors health risk factors and the prevalence of  
22  
23 135 chronic diseases.<sup>17</sup> A special survey team visits four regions every week (192 regions per  
24  
25 136 year) and conducts a health examination, health interview, and nutrition survey. This survey  
26  
27 137 includes a representative sample of the population selected using a stratified, multi-stage, and  
28  
29 138 clustered sampling method. Sampling units are district, survey area, and household.  
30  
31 139 Stratification variables are city/province, district, and housing type. The sample is weighted  
32  
33 140 to reflect sampling rate, response rate, and population demographics in order to estimate  
34  
35 141 health consciousness, health behavior, and nutritional status on behalf of the population.  
36  
37  
38  
39  
40  
41  
42

43 143 Among 59,015 individuals who were surveyed in KNHANES between 2009 and 2015, we  
44  
45 144 selected 4,148 adolescents aged 12–18 years with available lipid profile data. Next, we  
46  
47 145 obtained data for the mothers of these adolescents during the same survey period by matching  
48  
49 146 household identification numbers. After the exclusion of 1,264 individuals with missing  
50  
51 147 information about adolescent's or mother's baseline characteristics or clinical findings, 2,884  
52  
53 148 adolescents were eligible for the study (Figure 1). Use of the data from KNHANES was  
54  
55 149 approved by the Institutional Review Board of the KCDC (2009-01CON-03-2C, 2010-  
56  
57 02CON-21-C, 2011-02CON-06-C, 2012-01EXP-01-2C, 2013-07CON-03-4C, and 2013-  
58  
59 150

1  
2  
3 151 12EXP-03-5C). This survey has been available for use without approval since 2015.  
4  
5  
6 152

7  
8 153 **Outcome variables and health behavioral factors**  
9

10 154 Both adolescent's and mother's lipid profiles consisted of total cholesterol (TC), TG, HDL-C,  
11  
12 155 and LDL-C. Outcome variables in the study were adolescents' lipid levels. Mothers' lipid  
13  
14 156 levels, which represent genetic linkage, were interesting variables. In order to examine their  
15  
16 157 relationship, we adjusted various clinical and health behavioral factors of both adolescents  
17  
18 158 and mothers. The level of LDL-C was calculated using the Friedewald equation. If the TG  
19  
20 159 level was 400 mg/dL or more, measurement of LDL-C was performed by using the  
21  
22 160 immunochemical method. Adolescents were divided into two age groups based on whether  
23  
24 161 they were high school students. In terms of obesity, we divided the study subjects into two  
25  
26 162 groups using an 85% cut-off of the body mass index (BMI) based on the age groups and sex  
27  
28 163 for adolescents, and divided into three groups ( $<23$ ,  $23-24.9$ ,  $\geq 25$  kg/m<sup>2</sup>) for mothers.<sup>18 19</sup>  
29  
30  
31 164 The values of fasting glucose were also divided into two groups based on the level of  
32  
33 165 impaired fasting glucose ( $\geq 100$  mg/dL). Degree of stress was divided into three groups based  
34  
35 166 on individuals' perception. In addition, frequency of eating out, walking, and exercise per  
36  
37 167 week were investigated for adolescent health behaviors.  
38  
39  
40  
41  
42  
43  
44  
45 168

46 169 For mothers' variables, we used data regarding smoking and alcohol habits, degree of  
47  
48 170 education and family income, economic activity, and frequency of eating out per week.  
49  
50 171 Mother's dyslipidemia was defined based on TC level of 240 mg/dL or more, and included  
51  
52 172 cases of individuals diagnosed or treated with dyslipidemia even if the TC level was normal.  
53  
54  
55

56 173

57  
58 174 **Statistical methods**  
59  
60

1  
2  
3 175 Lipid profiles were analyzed as continuous variables with mean and standard deviation (SD)  
4  
5 176 in both adolescents and their mothers. We checked whether the continuous variables were  
6  
7 177 normally distributed, and used a log scale depending on the results. Independent sample *t*-  
8  
9 178 tests or one-way analysis of variances (ANOVA) was used for categorical independent  
10  
11 179 variables to analyze the relationship with adolescents' lipid levels. The correlation of lipid  
12  
13 180 levels between adolescents and their mothers was analyzed using partial correlations (*r*) with  
14  
15 181 95% confidence interval (CI). The *r* values were interpreted as slight (>0–0.2), fair (>0.2–  
16  
17 182 0.4), moderate (>0.4–0.6), substantial (>0.6–0.8), and almost perfect (>0.8). Next, multiple  
18  
19 183 linear regressions with parameter estimates (beta coefficients) and standard error (SE) were  
20  
21 184 performed to identify an amount change in adolescents' lipid levels by each unit increase of  
22  
23 185 their mothers' lipids. We used survey based statistical regression analyses, and the design  
24  
25 186 effect relating survey sampling was calculated. The regression models included clinical  
26  
27 187 characteristics and health behavioral factors of both adolescents and mothers. In order to find  
28  
29 188 the most adequate model fits among 16 possible combinations between four adolescents' and  
30  
31 189 their mothers' lipid profiles, we calculated adjusted R squared values, which represent the  
32  
33 190 explanatory power of the model. In addition, the beta coefficients were also determined in the  
34  
35 191 subgroups by sex and mother's characteristics (age group, BMI, degree of education,  
36  
37 192 economic activity, and presence or absence of dyslipidemia) using multiple linear regression.  
38  
39 193 Lastly, sensitivity test was done on 4,148 adolescents including 1,264 subjects who had  
40  
41 194 inadequate baseline information or missing mothers' data to identify the baseline  
42  
43 195 characteristics. All 2-sided *P* values <0.05 were considered significant. Statistical analyses  
44  
45 196 were performed using SAS version 9.4 (SAS Institute, Cary, NC, USA).  
46  
47  
48  
49  
50  
51  
52  
53  
54  
55

## 56 198 **Patient and public involvement**

57  
58 199 This study is a population-based survey study. Patients and public were not involved.  
59  
60

200

**RESULTS**

Table 1 shows baseline characteristics and their associations with adolescent lipid levels, and it appears that *P* values are in the log scale. The mean age of the study population was 14.7 ± 1.9 years (range, 12–18 years), and 52.8% of the adolescents were male. A total of 9.3% of the individuals were overweight. The mean levels (ranges) of adolescents' lipids were 156.6 ± 27.0 (82–350), 83.6 ± 46.4 (15–602), 50.4 ± 9.8 (22–96), and 89.4 ± 23.3 mg/dL (9–296), respectively, for TC, TG, HDL-C, and LDL-C. HDL-C level was decreased in the older age group (*P*=0.021). While TC, HDL-C, and LDL-C levels were significantly higher in female adolescents than in their male counterparts, TG was not different by sex. Individuals with increased BMI showed higher TC, TG, and LDL-C levels, and lower HDL-C levels compared with those within the normal percentile range for BMI. The frequency of eating out was inversely associated with TC level (*P*=0.032), while increased frequency of walking was associated with decreased TC and LDL-C levels (*P*=0.006 and *P*=0.005, respectively). TG level tends to increased in the adolescents whose mothers were obese (BMI ≥ 25 kg/m<sup>2</sup>), while the level of HDL-C was inversely associated with the mother's BMI and increasing age. Other health behaviors of the mothers' did not show any significant associations with their adolescents' lipid levels.

218

Adolescent TC level demonstrated a fair positive correlation with mother's TC level (*r*, 0.271; 95% confidence interval (CI), 0.236–0.304) (Supplementary Figure S1). TG, HDL-C, and LDL-C levels also had fair positive correlations between adolescents and their mothers, yielding *r* (95% CI) = 0.204 (0.169–0.239), 0.289 (0.255–0.322), and 0.286 (0.252–0.319), respectively. For reference, the correlations among the four adolescent lipid profiles

1  
2  
3 224 demonstrated an almost perfect correlation between the TC and LDL-C levels ( $r$ , 0.915; 95%  
4  
5 225 CI, 0.909–0.921;  $P$ <.001), and showed a significant negative correlation between HDL-C and  
6  
7 226 TG ( $r$ , -0.329; 95% CI, -0.361–-0.296;  $P$ <.001). Meanwhile, the partial correlation coefficient  
8  
9 227 (95% CI) for TC, TG, HDL-C, and LDL-C was 0.254 (0.206-0.301), 0.235 (0.186-0.282),  
10  
11 228 0.271 (0.224-0.317), and 0.267 (0.220-0.313) in males ( $n$ =1522), and it was 0.291 (0.241-  
12  
13 229 0.339), 0.168 (0.116-0.220), 0.317 (0.268-0.364), and 0.309 (0.260-0.357) in females  
14  
15 230 ( $n$ =1362). All  $P$  values were less than 0.001.

16  
17 231  
18  
19  
20  
21 232 Based on the adjusted R squared values, the four most adequate regression models were  
22  
23 233 selected (Supplementary Table S1). Table 2 displays the multiple linear regressions of the  
24  
25 234 four adequate models. It appears that  $P$  values are in the log scale. The design effect from  
26  
27 235 survey sampling was 1.01, 1.43, 1.07, and 1.07 in TC, TG, HDL-C, and LDL-C respectively.  
28  
29 236 Adolescent TC increased by 0.23 mg/dL on average as their mothers' TC increased by 1  
30  
31 237 mg/dL (SE, 0.02,  $P$ <.001). The beta coefficients were 0.16 (SE, 0.01), 0.24 (SE, 0.02), and  
32  
33 238 0.24 (SE, 0.02), respectively, in each model of TG, HDL-C, and LDL-C (all  $P$ <.001). TC  
34  
35 239 increased by 13.32 mg/dL in the female adolescents compared with their male counterparts;  
36  
37 240 other lipid parameters were also higher in female adolescents compared with their male  
38  
39 241 counterparts. BMI had a positive association with the levels of TC, TG, and LDL-C, while  
40  
41 242 HDL-C was negatively associated with BMI. The frequency of eating out and walking tended  
42  
43 243 to be inversely associated with TC and LDL-C. Exercise more than 3 days per week was  
44  
45 244 associated with increased TC and LDL-C levels compared with no exercise. With regard to  
46  
47 245 mother's variables, overall adolescents' lipid levels tended to decrease as their mothers' age  
48  
49 246 increased, and other lipids apart from HDL-C tended to decrease when the mother's BMI  
50  
51 247 increased. Increased mothers' alcohol consumption was also significantly associated with  
52  
53 248 decreased adolescents' HDL-C. Mothers' education, working hours, frequency of eating out,  
54  
55  
56  
57  
58  
59  
60

249 and family income did not affect adolescent lipid levels.

250

251 Figure 2 represents the amount change in adolescents' lipid levels with each unit increase of  
252 mothers' lipids in the subgroups. In most subgroups, there were significant positive  
253 relationships between lipids in adolescents and mothers, with the exception of subgroups with  
254 relatively small sample sizes (Table 3). The beta coefficients of TC, HDL-C, and LDL-C  
255 were high in female adolescents compared with their male counterparts, whereas that of TG  
256 was higher in the male adolescents. When the lipid profiles were considered as binary  
257 outcomes, multivariate logistic regressions showed that adolescents' dyslipidemia was  
258 significantly associated with mothers' dyslipidemia (Supplementary Table S2). Finally, the  
259 sensitivity test on 4,148 adolescents showed comparable baseline characteristics with our  
260 study data (Supplementary Table S3).

261

## 262 **DISCUSSIONS**

263 There is significance in that our study analyzed linear relationships of TC, TG, HDL-C, and  
264 LDL-C, respectively, with an amount change of adolescents' lipid levels for each unit  
265 increase of their mothers' lipids. We adjusted for various health behavioral factors of  
266 adolescents and their mothers, as well as using a large national database. Moreover, we found  
267 that relationships between lipids of adolescents and their mothers were significant regardless  
268 of sex and mother characteristics.

269

270 Atherosclerosis is triggered by childhood obesity associated with lipid abnormalities, rather  
271 than obesity itself.<sup>20</sup> The prevalence of dyslipidemia was 6.5% in Korea by the cut-off of  
272 National Cholesterol Education Program (NECP) and American Heart Association (AHA)  
273 guidelines.<sup>21</sup> Meanwhile, the most frequent components among five MetS criteria in

1  
2  
3 274 adolescence were high TG (21.2%) and low HDL-C (13.6%).<sup>22</sup> When cut-off values of a  
4  
5  
6 275 recent guideline were applied to our data,<sup>23</sup> the percentages of abnormal TC ( $\geq 200$  mg/dL),  
7  
8  
9 276 TG ( $\geq 130$  mg/dL), HDL-C ( $<40$  mg/dL), and LDL-C ( $\geq 130$  mg/dL) were 6.6%, 11.9%,  
10  
11  
12 277 13.3%, and 5.0%, respectively. Atherogenic dyslipidemia, characterized by the combination  
13  
14 278 of high TG and small dense LDL-C, and low HDL-C, was a common form of dyslipidemia in  
15  
16 279 young individuals (aged, 2–18 years) and had a strong familial aggregation.<sup>24</sup> Even taking  
17  
18  
19 280 into consideration the argument that a higher cut-off level of TG ( $\geq 150$  mg/dL) is appropriate  
20  
21  
22 281 for Korean adolescents,<sup>25</sup> the rate of high TG observed in the present study was 7.7%. That is,  
23  
24 282 our data showed a more considerable proportion of abnormal TG and HDL-C in adolescents  
25  
26 283 compared to other lipid parameters. Thus, the present study provides further evidence that  
27  
28 284 dyslipidemia especially atherogenic dyslipidemia is a big problem in Korean adolescents,  
29  
30 285 with the concern that it leads to CVD during the remainder of the lifespan.  
31  
32  
33  
34 286  
35  
36 287 It has been reported that dyslipidemia was associated with increased odds of dyslipidemia in  
37  
38 288 first-degree relatives (OR = 2.2).<sup>26</sup> This familial clustering is in turn caused by both genetic  
39  
40 289 backgrounds and shared environmental factors within a family. A previous study found that  
41  
42 290 genes contribute more than environment to familial correlation of lipids and obesity.<sup>15</sup> In this  
43  
44 291 regard, numerous genetic determinants regulating lipid concentrations has been  
45  
46 292 investigated.<sup>27</sup> In addition, an animal study demonstrated that maternal dyslipidemia affected  
47  
48 293 offspring's lipid levels by activation of endogenous cholesterol synthesis.<sup>28</sup> Whatever the  
49  
50 294 cause or, a family history must be a major risk factor for adolescent's dyslipidemia.  
51  
52  
53 295 Meanwhile, even in the subgroup of mothers who had normal TC levels and had never been  
54  
55 296 diagnosed with dyslipidemia, the positive relationships in lipids between the adolescents and  
56  
57  
58  
59  
60

1  
2  
3 297 their mothers were significant for all lipid parameters. These findings may reflect  
4  
5 298 environmental impacts such as healthy diet, exercise habits, and efforts to improve lifestyles  
6  
7 299 within families, rather than just a hereditary influence. Of course, there may also be an impact  
8  
9  
10 300 from other genetic factors such as diabetes or hypertension in first-degree relatives.<sup>26</sup>  
11  
12 301 Interestingly, the beta coefficient was higher in adolescents with non-obese mothers  
13  
14 302 compared to those with obese mothers. It is possible that the genetic background of non-  
15  
16 303 obese dyslipidemic mothers affected the lipid levels of their offspring. However, the mean  
17  
18 304 BMI of dyslipidemic mothers was higher than that of non-dyslipidemic mothers (24.7 kg/m<sup>2</sup>  
19  
20 305 vs. 23.2 kg/m<sup>2</sup>). Moreover, the beta coefficient was also higher in adolescents with non-  
21  
22 306 dyslipidemic mothers than in those with dyslipidemic mothers. Thus, it is more likely that the  
23  
24 307 mothers' perception regarding dyslipidemia influences the adolescents' lipid levels. Of  
25  
26 308 course, this interpretation requires consideration of relationship between lipids and  
27  
28 309 characteristics in mothers. Awareness of dyslipidemia was relatively low despite its higher  
29  
30 310 prevalence worldwide.<sup>29</sup> A mother's perception of lipid levels could affect her children's  
31  
32 311 lipids through efforts related to lifestyle and diet changes.<sup>30</sup> A recent Korean study  
33  
34 312 highlighted education and counseling in order to change health behavior in addition to  
35  
36 313 awareness of dyslipidemia.<sup>31</sup> Our results from subgroup analyses support these previous  
37  
38 314 studies and highlight the influence of the mother's perception of dyslipidemia and resultant  
39  
40 315 lifestyle changes.

316

41  
42  
43  
44  
45  
46  
47  
48  
49 317 There is no doubt that lifestyle modification plays a central role in lipid control. Moreover,  
50  
51 318 considering the high rates of abnormal TG and HDL-C and the restricted indications of lipid-  
52  
53 319 lowering agents in youth, lifestyle changes should play a larger role in adolescent patients.  
54  
55  
56 320 Our results showed that frequent walking was negatively associated with TC and LDL-C  
57  
58 321 levels, which is predictable. Meanwhile, frequent eating out was associated with decreased  
59  
60



1  
2  
3 322 TC and LDL-C, a finding that conflicts with a general notion that eating out induces a high  
4  
5 323 calorie intake or overeating. Eating out was defined as all foods except home-cooked dishes  
6  
7  
8 324 in this survey, then including school meals as well as dining out and delivery foods. Actually,  
9  
10 325 the frequency of eating out showed a great discrepancy between adolescents and mothers in  
11  
12 326 this study. Thus, school foods may compensate for negative effects of eating out by providing  
13  
14 327 regular and well-balanced meals. The positive correlation between exercise and lipid levels,  
15  
16 328 which is also an unexpected result, seems to be influenced by exercise intensity. Exercise  
17  
18 329 frequency alone was not sufficient to explain the effect of exercise adequately; thus, the  
19  
20 330 strength and duration of exercise should be considered. Our data regarding health behavioral  
21  
22 331 factors should be more detailed and concrete. However, it is certain that health behavioral  
23  
24 332 habits influence the lipid levels of adolescents, and therefore adolescents with dyslipidemia  
25  
26 333 and their families should be encouraged to improve their lifestyles.  
27  
28  
29  
30

31 334  
32  
33 335 Cholesterol levels in children and adolescents are highly dependent on age and sex.<sup>32</sup> Our  
34  
35 336 data showed that the levels of TC, LDL-C, and HDL-C were higher in female adolescents  
36  
37 337 than in males. In addition, the beta coefficients per unit increase of mother's TC, LDL-C, and  
38  
39 338 HDL-C were also prominent in females. It is possible that mothers with female offspring are  
40  
41 339 either more obese and dyslipidemic or otherwise. However, mother's mean BMI was similar  
42  
43 340 between male and female adolescents ( $23.3 \pm 3.2$  and  $23.5 \pm 3.3$  kg/m<sup>2</sup>, respectively,  $P=0.161$ );  
44  
45 341 furthermore, the rate of mother's dyslipidemia showed no statistical difference between male  
46  
47 342 and female adolescents (10.8% vs. 9.8%, respectively,  $P=0.373$ ). Thus, the difference of beta  
48  
49 343 coefficient by sex may be due to a distinct difference in lipid levels by sex. This is supported  
50  
51 344 by our result that the TG level was higher in male than in female adolescents and the beta  
52  
53 345 coefficient of TG was also higher in male adolescents.  
54  
55  
56  
57  
58  
59  
60

346

1  
2  
3  
4  
5  
6 347 This study has several limitations. First, because it is a survey-based study, our data are  
7  
8 348 vulnerable to recall bias. Second, as it is a cross-sectional design, there was no causal  
9  
10 349 relationship. This factor will be particularly important in consideration of the impacts due to  
11  
12 350 environmental factors. Further well-designed cohort studies are warranted. Third, individuals  
13  
14 351 who responded to the national survey could have greater health concerns. They may have  
15  
16 352 better health behavioral habits, or family members with chronic diseases. However, this  
17  
18 353 survey was uniformly performed in all regions of Korea and targeted all age groups; thus, our  
19  
20 354 data can be considered nationally representative samples. Fourth, the nutritional factors,  
21  
22 355 which were not considered in the analyses because of insufficient information and large  
23  
24 356 missing values, can be significant confounding factors. Further studies based on detailed  
25  
26 357 surveys for health behavioral factors and nutritional elements are needed. Fifth, we did not  
27  
28 358 evaluate the father's lipid levels. If the father's lipid levels had also been considered, the  
29  
30 359 genetic backgrounds of lipids might be emphasized more. Sixth, various comorbidities such  
31  
32 360 as hypothyroidism, Cushing's disease, liver disease, and nephrotic syndrome, among others,  
33  
34 361 as well as long-term use of steroid can affect lipid level,<sup>33</sup> and these could be also  
35  
36 362 confounding factors. However, these chronic diseases are extremely rare during the  
37  
38 363 adolescent period, and thus could be negligible. Finally, the results of our study need to be  
39  
40 364 evaluate with caution as they might be vulnerable to family-wise type I error due to the  
41  
42 365 multiple test involved in our analysis. However, even considering this, the *P* values for the  
43  
44 366 associations are sufficiently significant. Additionally, R-squared indicates just how well the  
45  
46 367 model explains variability of the response data. Although we chose four models, which  
47  
48 368 showed high R-squared, it does not mean accurate representation of goodness of fit for the  
49  
50 369 models.  
51  
52  
53  
54  
55  
56  
57  
58  
59  
60

370

1  
2  
3 371 In conclusion, a mother's lipid levels were positively associated with her adolescents' lipid  
4  
5 372 levels because of both genetic and environmental factors within the family. Adolescent  
6  
7 373 dyslipidemia creates a large risk factor burden for cardiovascular diseases; therefore, timely  
8  
9 374 screening for dyslipidemia is important, especially for indicated adolescents. Our positive  
10  
11 375 correlation between lipids of adolescents and their mothers supports that the mother's lipid  
12  
13 376 level is an appropriate reference for the screening of the adolescent's dyslipidemia.  
14  
15  
16  
17 377

18  
19 378 **Acknowledgements** The authors thank the participants for their cooperation and the staffs of  
20  
21 379 KNHANES (<https://knhanes.cdc.go.kr/knhanes/index.do>) for their hard work.  
22  
23

24 380 **Contributors** E.C.P and S.I.J designed the study. J.H.N. and J.S. analyzed and interpreted  
25  
26 381 the data. J.H.N., J.K.L., and Y.J.L. drafted the manuscript. J.H.K. and K.T.H critically  
27  
28 382 revised the manuscript. All authors read and approved the final version.  
29  
30

31 383 **Funding** This work was not supported by any funding.  
32

33 384 **Competing interests** The authors declare no competing interest.  
34

35 385 **Participant consent** This nationwide survey is fully anonymized and does not require  
36  
37 386 informed consent.  
38

39  
40 387 **Ethics approval** This study was analyzed using KNHANES secondary data. Use of the data  
41  
42 388 was approved by the Institutional Review Board of the KCDC.  
43

44 389 **Availability of data and material** All data analyzed during this study are available in the  
45  
46 390 KCDC and KNHANES repository, [[https://knhanes.cdc.go.kr/knhanes/sub03/sub03\\_01.do](https://knhanes.cdc.go.kr/knhanes/sub03/sub03_01.do)]  
47  
48

49 391

## 50 51 392 **REFERENCES**

- 52  
53  
54 393 1. Berenson GS, Srinivasan SR, Bao W, et al. Association between multiple  
55  
56 394 cardiovascular risk factors and atherosclerosis in children and young adults. The  
57  
58 395 Bogalusa Heart Study. N Engl J Med 1998;338:1650-6.  
59  
60

- 1  
2  
3 396 2. Cause-of-death statistics in the Republic of Korea, 2014. *J Korean Med Assoc*  
4  
5 397 2016;59:221-32.  
6  
7  
8 398 3. Urbina EM, Khoury PR, McCoy CE, et al. Triglyceride to HDL-C ratio and increased  
9  
10 399 arterial stiffness in children, adolescents, and young adults. *Pediatrics*  
11  
12 400 2013;131:e1082-90.  
13  
14  
15 401 4. McGill HC, Jr., McMahan CA, Zieske AW, et al. Associations of coronary heart  
16  
17 402 disease risk factors with the intermediate lesion of atherosclerosis in youth. The  
18  
19 403 Pathobiological Determinants of Atherosclerosis in Youth (PDAY) Research Group.  
20  
21 404 *Arterioscler Thromb Vasc Biol* 2000;20:1998-2004.  
22  
23  
24 405 5. Margolis KL, Greenspan LC, Trower NK, et al. Lipid screening in children and  
25  
26 406 adolescents in community practice: 2007 to 2010. *Circ Cardiovasc Qual Outcomes*  
27  
28 407 2014;7:718-26.  
29  
30  
31 408 6. Smetanina N, Albaviciute E, Babinska V, et al. Prevalence of overweight/obesity in  
32  
33 409 relation to dietary habits and lifestyle among 7-17 years old children and adolescents  
34  
35 410 in Lithuania. *BMC Public Health* 2015;15:1001.  
36  
37  
38 411 7. Korea Centers for Disease Control and Prevention. Korea Health Statistics 2014:  
39  
40 412 Korea National Health and Nutrition Examination Survey (KNHANES VI-2);  
41  
42 413 Ministry of Health and Welfare: Seoul, Korea. 2014.  
43  
44  
45 414 8. Ogden CL, Carroll MD, Curtin LR, et al. Prevalence of high body mass index in US  
46  
47 415 children and adolescents, 2007-2008. *JAMA* 2010;303:242-9.  
48  
49  
50 416 9. Ha KH, Kim DJ. Epidemiology of Childhood Obesity in Korea. *Endocrinol Metab*  
51  
52 417 (Seoul) 2016;31:510-8.  
53  
54  
55 418 10. Wang CJ, Li YQ, Wang L, et al. Development and evaluation of a simple and  
56  
57 419 effective prediction approach for identifying those at high risk of dyslipidemia in rural  
58  
59 420 adult residents. *PLoS One* 2012;7:e43834.  
60

- 1  
2  
3 421 11. Danese A, Moffitt TE, Harrington H, et al. Adverse childhood experiences and adult  
4  
5 422 risk factors for age-related disease: depression, inflammation, and clustering of  
6  
7 423 metabolic risk markers. *Arch Pediatr Adolesc Med* 2009;163:1135-43.  
8  
9  
10 424 12. Buitrago-Lopez A, van den Hooven EH, Rueda-Clausen CF, et al. Socioeconomic  
11  
12 425 status is positively associated with measures of adiposity and insulin resistance, but  
13  
14 426 inversely associated with dyslipidaemia in Colombian children. *J Epidemiol  
15  
16 427 Community Health* 2015;69:580-7.  
17  
18  
19 428 13. Tarini BA, McInerney JD. Family history in primary care pediatrics. *Pediatrics*  
20  
21 429 2013;132:S203-10.  
22  
23  
24 430 14. Kathiresan S, Manning AK, Demissie S, et al. A genome-wide association study for  
25  
26 431 blood lipid phenotypes in the Framingham Heart Study. *BMC Med Genet* 2007;8  
27  
28 432 Suppl 1:S17.  
29  
30  
31 433 15. Hunt SC, Hasstedt SJ, Kuida H, et al. Genetic heritability and common environmental  
32  
33 434 components of resting and stressed blood pressures, lipids, and body mass index in  
34  
35 435 Utah pedigrees and twins. *Am J Epidemiol* 1989;129:625-38.  
36  
37  
38 436 16. Predazzi IM, Sobota RS, Sanna S, et al. Sex-Specific Parental Effects on Offspring  
39  
40 437 Lipid Levels. *J Am Heart Assoc* 2015;4:e001951.  
41  
42  
43 438 17. Kweon S, Kim Y, Jang MJ, et al. Data resource profile: the Korea National Health  
44  
45 439 and Nutrition Examination Survey (KNHANES). *Int J Epidemiol* 2014;43:69-77.  
46  
47  
48 440 18. Park HW, Yoo HY, Kim CH, et al. Reference values of body composition indices: the  
49  
50 441 Korean National Health and Nutrition Examination Surveys. *Yonsei Med J*  
51  
52 442 2015;56:95-102.  
53  
54 443 19. Jee SH, Sull JW, Park J, et al. Body-mass index and mortality in Korean men and  
55  
56 444 women. *N Engl J Med* 2006;355:779-87.  
57  
58  
59 445 20. D'Adamo E, Guardamagna O, Chiarelli F, et al. Atherogenic dyslipidemia and  
60

- 1  
2  
3 446 cardiovascular risk factors in obese children. *Int J Endocrinol* 2015;2015:912047.
- 4  
5 447 21. Lim JS. The current state of dyslipidemia in Korean children and adolescents and its  
6  
7 management in clinical practice. *Ann Pediatr Endocrinol Metab* 2013;18:1-8.
- 8 448  
9  
10 449 22. Kim S, So WY. Prevalence of Metabolic Syndrome among Korean Adolescents  
11  
12 According to the National Cholesterol Education Program, Adult Treatment Panel III  
13  
14 and International Diabetes Federation. *Nutrients* 2016;8:558.
- 15 451  
16  
17 452 23. Expert Panel on Integrated Guidelines for Cardiovascular H, Risk Reduction in C,  
18  
19 Adolescents, National Heart L, Blood I. Expert panel on integrated guidelines for  
20  
21 cardiovascular health and risk reduction in children and adolescents: summary report.  
22  
23 *Pediatrics* 2011;128 Suppl 5:S213-56.
- 24 455  
25  
26 456 24. Montali A, Truglio G, Martino F, et al. Atherogenic dyslipidemia in children:  
27  
28 evaluation of clinical, biochemical and genetic aspects. *PLoS One* 2015;10:e0120099.
- 29 457  
30  
31 458 25. Yoon JM. Dyslipidemia in children and adolescents: when and how to diagnose and  
32  
33 treat? *Pediatr Gastroenterol Hepatol Nutr* 2014;17:85-92.
- 34 459  
35  
36 460 26. Khoury M, Manlhiot C, Gibson D, et al. Universal screening for cardiovascular  
37  
38 disease risk factors in adolescents to identify high-risk families: a population-based  
39  
40 cross-sectional study. *BMC Pediatr* 2016;16:11.
- 41 462  
42  
43 463 27. Calandra S, Tarugi P, Speedy HE, et al. Mechanisms and genetic determinants  
44  
45 regulating sterol absorption, circulating LDL levels, and sterol elimination:  
46  
47 implications for classification and disease risk. *J Lipid Res* 2011;52:1885-926.
- 48 465  
49 466 28. Goharkhay N, Tamayo EH, Yin H, et al. Maternal hypercholesterolemia leads to  
50  
51 activation of endogenous cholesterol synthesis in the offspring. *Am J Obstet Gynecol*  
52  
53 2008;199:273 e271-6.
- 54 468  
55  
56 469 29. Zhang FL, Xing YQ, Wu YH, et al. The prevalence, awareness, treatment, and control  
57  
58 of dyslipidemia in northeast China: a population-based cross-sectional survey. *Lipids*  
59  
60

- 1  
2  
3 471 Health Dis 2017;16:61.  
4  
5 472 30. Price JH, Casler SM. African-American mothers' perceptions of cholesterol and its  
6  
7 effects on their children. J Natl Med Assoc 1996;88:145-50.  
8 473  
9  
10 474 31. Cho IY, Park HY, Lee K, et al. Association Between the Awareness of Dyslipidemia  
11  
12 and Health Behavior for Control of Lipid Levels Among Korean Adults with  
13 475  
14 Dyslipidemia. Korean J Fam Med 2017;38:64-74.  
15 476  
16  
17 477 32. Skinner AC, Steiner MJ, Chung AE, et al. Cholesterol curves to identify population  
18  
19 norms by age and sex in healthy weight children. Clin Pediatr (Phila) 2012;51:233-7.  
20 478  
21 479 33. Vodnala D, Rubenfire M, Brook RD. Secondary causes of dyslipidemia. Am J Cardiol  
22  
23 2012;110:823-5.  
24 480  
25  
26 481

## 482 **FIGURE LEGENDS**

483 **Figure 1** Study flow showing sample selection. We selected 2,884 adolescents aged 12–18  
484 whose mothers' data were also available.

485 **Figure 2** Bar graphs showing standardized beta coefficients of adolescent's lipids for each  
486 unit increase of their mother's lipids in subgroups. HDL-C, high-density lipoprotein  
487 cholesterol; LDL-C, low-density lipoprotein cholesterol; TC, total cholesterol; TG,  
488 triglyceride.

**Table 1** Relationship between baseline characteristics and adolescent's lipid profiles

|                             | No. (%)     | TC    |      |                             | TG    |      |                             | HDL-C |      |                             | LDL-C |      |                             |
|-----------------------------|-------------|-------|------|-----------------------------|-------|------|-----------------------------|-------|------|-----------------------------|-------|------|-----------------------------|
|                             |             | Mean  | SD   | <i>P</i> value <sup>†</sup> |
| All (n=2884)                |             | 156.6 | 27.0 |                             | 83.6  | 46.4 |                             | 50.4  | 9.8  |                             | 89.4  | 23.3 |                             |
| <b>Adolescent variables</b> |             |       |      |                             |       |      |                             |       |      |                             |       |      |                             |
| Age (years)                 |             |       |      | 0.359                       |       |      | 0.825                       |       |      | 0.021                       |       |      | 0.932                       |
| 12-14                       | 1454 (50.4) | 156.9 | 26.4 |                             | 84.0  | 47.0 |                             | 50.8  | 9.8  |                             | 89.2  | 22.8 |                             |
| 15-18                       | 1430 (49.6) | 156.2 | 27.6 |                             | 83.1  | 45.8 |                             | 50.0  | 9.8  |                             | 89.6  | 23.8 |                             |
| Sex                         |             |       |      | <.001                       |       |      | 0.729                       |       |      | <.001                       |       |      | <.001                       |
| Male                        | 1522 (52.8) | 151.4 | 27.1 |                             | 84.6  | 49.7 |                             | 48.7  | 9.6  |                             | 85.9  | 23.5 |                             |
| Female                      | 1362 (47.2) | 162.3 | 25.9 |                             | 82.4  | 42.3 |                             | 52.4  | 9.7  |                             | 93.4  | 22.5 |                             |
| BMI*                        |             |       |      | 0.016                       |       |      | <.001                       |       |      | <.001                       |       |      | <.001                       |
| <85%                        | 2617 (90.7) | 156.1 | 26.6 |                             | 81.0  | 44.6 |                             | 51.1  | 9.7  |                             | 88.9  | 22.9 |                             |
| ≥85%                        | 267 (9.3)   | 160.7 | 30.7 |                             | 109.1 | 55.5 |                             | 44.2  | 8.0  |                             | 94.6  | 26.3 |                             |
| Glucose (mg/dl)             |             |       |      | 0.047                       |       |      | 0.536                       |       |      | 0.987                       |       |      | 0.438                       |
| ≤100                        | 2752 (95.4) | 156.4 | 26.8 |                             | 83.4  | 46.2 |                             | 50.4  | 9.8  |                             | 89.3  | 23.1 |                             |
| >100                        | 132 (4.6)   | 159.6 | 32.1 |                             | 86.8  | 49.9 |                             | 50.5  | 10.0 |                             | 91.7  | 27.7 |                             |
| Stress level                |             |       |      | 0.439                       |       |      | 0.955                       |       |      | 0.545                       |       |      | 0.335                       |
| Non                         | 476 (16.5)  | 156.9 | 28.3 |                             | 82.8  | 43.9 |                             | 50.1  | 9.6  |                             | 90.2  | 24.6 |                             |
| Mild                        | 1714 (59.4) | 156.9 | 26.8 |                             | 83.7  | 45.7 |                             | 50.6  | 9.9  |                             | 89.6  | 23.3 |                             |
| Moderate                    | 694 (24.1)  | 155.5 | 26.8 |                             | 83.8  | 49.7 |                             | 50.3  | 9.7  |                             | 88.4  | 22.5 |                             |
| Eating out/week             |             |       |      | 0.032                       |       |      | 0.368                       |       |      | 0.471                       |       |      | 0.118                       |
| ≥7                          | 1121 (38.9) | 154.8 | 26.3 |                             | 81.0  | 40.4 |                             | 50.1  | 9.7  |                             | 88.4  | 22.9 |                             |
| 5-6                         | 1676 (58.1) | 157.5 | 27.4 |                             | 85.1  | 50.0 |                             | 50.6  | 9.8  |                             | 89.9  | 23.6 |                             |
| 1-4                         | 66 (2.3)    | 159.3 | 25.6 |                             | 85.6  | 44.9 |                             | 50.4  | 10.5 |                             | 91.6  | 21.0 |                             |
| <1                          | 21 (0.7)    | 164.6 | 33.3 |                             | 90.4  | 48.2 |                             | 48.4  | 9.5  |                             | 98.0  | 27.2 |                             |
| Walking/week                |             |       |      | 0.006                       |       |      | 0.955                       |       |      | 0.542                       |       |      | 0.005                       |
| 0-1 day                     | 321 (11.1)  | 159.1 | 26.4 |                             | 84.9  | 56.3 |                             | 50.8  | 10.1 |                             | 91.4  | 22.1 |                             |
| 2-4 days                    | 502 (17.4)  | 157.9 | 27.0 |                             | 84.4  | 44.6 |                             | 50.1  | 9.5  |                             | 90.8  | 23.7 |                             |
| 5-6 days                    | 760 (26.4)  | 157.9 | 28.6 |                             | 83.8  | 47.6 |                             | 50.8  | 9.9  |                             | 90.4  | 24.3 |                             |
| 7 days                      | 1301 (45.1) | 154.6 | 26.2 |                             | 82.8  | 43.6 |                             | 50.2  | 9.8  |                             | 87.8  | 22.7 |                             |
| Exercise/week               |             |       |      | 0.108                       |       |      | 0.193                       |       |      | 0.021                       |       |      | 0.382                       |
| Non                         | 1846 (64.0) | 157.3 | 26.8 |                             | 84.4  | 47.0 |                             | 50.8  | 10.0 |                             | 89.5  | 22.8 |                             |
| 1-2days                     | 633 (22.0)  | 155.7 | 27.5 |                             | 81.9  | 45.5 |                             | 49.5  | 9.1  |                             | 89.7  | 24.0 |                             |
| ≥3days                      | 405 (14.0)  | 154.7 | 27.4 |                             | 82.2  | 45.0 |                             | 50.1  | 9.8  |                             | 88.2  | 24.5 |                             |
| <b>Mother variables</b>     |             |       |      |                             |       |      |                             |       |      |                             |       |      |                             |
| Age (years)                 |             |       |      | 0.091                       |       |      | 0.502                       |       |      | 0.023                       |       |      | 0.566                       |
| 30-39                       | 505 (17.5)  | 157.7 | 25.8 |                             | 85.5  | 46.7 |                             | 51.2  | 9.7  |                             | 89.3  | 21.9 |                             |
| 40-49                       | 2154 (74.7) | 156.7 | 27.4 |                             | 83.3  | 46.7 |                             | 50.4  | 9.9  |                             | 89.6  | 23.7 |                             |
| 50-59                       | 225 (7.8)   | 153.1 | 26.1 |                             | 82.0  | 43.0 |                             | 49.0  | 8.7  |                             | 87.6  | 22.1 |                             |
| BMI (kg/m <sup>2</sup> )    |             |       |      | 0.486                       |       |      | 0.063                       |       |      | <.001                       |       |      | 0.475                       |



|    |                 |             |       |      |       |      |      |       |      |      |       |      |       |
|----|-----------------|-------------|-------|------|-------|------|------|-------|------|------|-------|------|-------|
| 1  |                 |             |       |      |       |      |      |       |      |      |       |      |       |
| 2  |                 |             |       |      |       |      |      |       |      |      |       |      |       |
| 3  | <23             | 1430 (49.6) | 156.6 | 26.4 |       | 82.2 | 42.9 |       | 51.1 | 9.7  |       | 89.0 | 22.3  |
| 4  | 23-24.9         | 684 (23.7)  | 155.6 | 26.7 |       | 81.9 | 44.6 |       | 50.1 | 9.7  |       | 89.1 | 23.2  |
| 5  | ≥25             | 770 (26.7)  | 157.4 | 28.5 |       | 87.6 | 53.4 |       | 49.5 | 10.0 |       | 90.5 | 25.1  |
| 6  | Smoking status  |             |       |      | 0.409 |      |      | 0.175 |      |      | 0.138 |      | 0.124 |
| 7  | Non             | 2648 (91.8) | 156.4 | 27.1 |       | 83.4 | 46.8 |       | 50.5 | 9.8  |       | 89.2 | 23.3  |
| 8  | Ex-Current      | 89 (3.1)    | 159.2 | 26.1 |       | 82.1 | 41.1 |       | 49.8 | 9.5  |       | 92.8 | 22.7  |
| 9  | Drinking status |             |       |      | 0.392 |      |      | 0.569 |      |      | 0.383 |      | 0.154 |
| 10 | Non             | 718 (24.9)  | 155.4 | 27.0 |       | 82.7 | 47.5 |       | 50.8 | 9.8  |       | 88.0 | 23.1  |
| 11 | ≤1/month        | 1250 (43.3) | 157.0 | 27.2 |       | 83.2 | 46.3 |       | 50.2 | 9.7  |       | 90.2 | 23.6  |
| 12 | ≥2/month        | 916 (31.8)  | 156.8 | 26.9 |       | 84.8 | 45.6 |       | 50.4 | 9.9  |       | 89.4 | 23.0  |
| 13 | Education level |             |       |      | 0.848 |      |      | 0.168 |      |      | 0.455 |      | 0.918 |
| 14 | Elementary      | 96 (3.3)    | 155.5 | 27.5 |       | 84.9 | 47.5 |       | 49.8 | 9.8  |       | 88.7 | 24.9  |
| 15 | Middle          | 177 (6.1)   | 157.1 | 28.5 |       | 84.5 | 46.0 |       | 49.9 | 8.8  |       | 90.3 | 24.6  |
| 16 | High            | 1624 (56.3) | 157.0 | 27.6 |       | 85.2 | 48.6 |       | 50.3 | 9.9  |       | 89.6 | 23.9  |
| 17 | University      | 987 (34.2)  | 155.9 | 25.8 |       | 80.6 | 42.3 |       | 50.8 | 9.7  |       | 89.0 | 21.8  |
| 18 | Income (1,000\) |             |       |      | 0.333 |      |      | 0.495 |      |      | 0.323 |      | 0.445 |
| 19 | <1,000          | 219 (7.6)   | 157.9 | 28.6 |       | 87.9 | 49.3 |       | 50.0 | 9.5  |       | 90.2 | 24.6  |
| 20 | 1,000-1,999     | 696 (24.1)  | 154.7 | 24.7 |       | 84.2 | 50.9 |       | 49.9 | 9.5  |       | 88.0 | 21.3  |
| 21 | 2,000-2,999     | 976 (33.8)  | 156.9 | 27.2 |       | 83.3 | 45.3 |       | 50.8 | 9.8  |       | 89.5 | 23.7  |
| 22 | ≥3,000          | 993 (34.4)  | 157.3 | 28.1 |       | 82.4 | 43.4 |       | 50.6 | 10.1 |       | 90.2 | 23.9  |
| 23 | Working hours   |             |       |      | 0.936 |      |      | 0.873 |      |      | 0.643 |      | 0.703 |
| 24 | Non             | 1679 (58.2) | 156.5 | 26.4 |       | 83.2 | 46.4 |       | 50.3 | 9.8  |       | 89.6 | 22.7  |
| 25 | Full-time       | 906 (31.4)  | 156.7 | 27.9 |       | 84.0 | 47.4 |       | 50.6 | 9.5  |       | 89.2 | 24.4  |
| 26 | Part time       | 299 (10.4)  | 156.3 | 27.9 |       | 84.3 | 42.9 |       | 50.3 | 10.5 |       | 89.0 | 23.2  |
| 27 | Eating out/week |             |       |      | 0.443 |      |      | 0.630 |      |      | 0.369 |      | 0.355 |
| 28 | ≥7              | 370 (12.8)  | 155.5 | 27.9 |       | 80.2 | 40.0 |       | 51.1 | 9.7  |       | 88.3 | 25.8  |
| 29 | 5-6             | 615 (21.3)  | 157.1 | 28.5 |       | 83.5 | 43.4 |       | 50.0 | 9.7  |       | 90.4 | 24.1  |
| 30 | 1-4             | 1278 (44.3) | 156.0 | 26.5 |       | 83.5 | 46.8 |       | 50.4 | 10.0 |       | 88.9 | 22.5  |
| 31 | <1              | 621 (21.5)  | 157.7 | 26.1 |       | 85.7 | 51.6 |       | 50.5 | 9.5  |       | 90.1 | 22.6  |

\*Based on body mass index (kg/m<sup>2</sup>) for age percentiles in male and female

†P values determined by log normal distributions

BMI, body mass index; HDL-C, high-density lipoprotein cholesterol; LDL-C, low-density lipoprotein cholesterol; SD, standard deviation; TC, total cholesterol; TG, triglyceride.

**Table 2** Multivariate analyses of four regression models for adolescent and mother’s lipid profiles

|                                            | TC & TC |        |       |                             | TG & TG |        |       |                             | HDL-C & HDL-C |        |       |                             | LDL-C & LDL-C |        |       |                             |
|--------------------------------------------|---------|--------|-------|-----------------------------|---------|--------|-------|-----------------------------|---------------|--------|-------|-----------------------------|---------------|--------|-------|-----------------------------|
|                                            | $\beta$ | S.B.   | S.E.  | <i>P</i> value <sup>†</sup> | $\beta$ | S.B.   | S.E.  | <i>P</i> value <sup>†</sup> | $\beta$       | S.B.   | S.E.  | <i>P</i> value <sup>†</sup> | $\beta$       | S.B.   | S.E.  | <i>P</i> value <sup>†</sup> |
| <b>Mother lipids</b><br>(beta coefficient) | 0.229   | 0.268  | 0.015 | <.001                       | 0.161   | 0.215  | 0.020 | <.001                       | 0.240         | 0.294  | 0.016 | <.001                       | 0.236         | 0.284  | 0.016 | <.001                       |
| <b>Adolescent variables</b>                |         |        |       |                             |         |        |       |                             |               |        |       |                             |               |        |       |                             |
| Age (years)                                |         |        |       |                             |         |        |       |                             |               |        |       |                             |               |        |       |                             |
| 12-14                                      | Ref     |        |       |                             | Ref     |        |       |                             | Ref           |        |       |                             | Ref           |        |       |                             |
| 15-18                                      | -0.168  | -0.003 | 1.071 | 0.671                       | -0.788  | -0.009 | 1.970 | 0.515                       | -0.476        | -0.024 | 0.388 | 0.213                       | 0.539         | 0.012  | 0.920 | 0.865                       |
| Sex                                        |         |        |       |                             |         |        |       |                             |               |        |       |                             |               |        |       |                             |
| Male                                       | Ref     |        |       |                             | Ref     |        |       |                             | Ref           |        |       |                             | Ref           |        |       |                             |
| Female                                     | 13.317  | 0.246  | 1.035 | <.001                       | 1.767   | 0.019  | 1.845 | 0.004                       | 2.936         | 0.150  | 0.378 | <.001                       | 9.954         | 0.213  | 0.892 | <.001                       |
| BMI (%)*                                   |         |        |       |                             |         |        |       |                             |               |        |       |                             |               |        |       |                             |
| <85                                        | Ref     |        |       |                             | Ref     |        |       |                             | Ref           |        |       |                             | Ref           |        |       |                             |
| ≥85                                        | 10.931  | 0.117  | 1.950 | <.001                       | 29.963  | 0.187  | 3.575 | <.001                       | -5.514        | -0.163 | 0.563 | <.001                       | 10.299        | 0.128  | 1.642 | <.001                       |
| Glucose (mg/dl)                            |         |        |       |                             |         |        |       |                             |               |        |       |                             |               |        |       |                             |
| ≤100                                       | Ref     |        |       |                             | Ref     |        |       |                             | Ref           |        |       |                             | Ref           |        |       |                             |
| >100                                       | 4.240   | 0.033  | 2.743 | 0.157                       | 3.483   | 0.016  | 4.322 | 0.404                       | 0.448         | 0.010  | 0.817 | 0.734                       | 2.768         | 0.025  | 2.334 | 0.343                       |
| Stress level                               |         |        |       |                             |         |        |       |                             |               |        |       |                             |               |        |       |                             |
| Non                                        | Ref     |        |       |                             | Ref     |        |       |                             | Ref           |        |       |                             | Ref           |        |       |                             |
| Mild                                       | -0.117  | -0.002 | 1.370 | 0.943                       | 1.583   | 0.017  | 2.229 | 0.531                       | 0.521         | 0.026  | 0.459 | 0.348                       | -0.979        | -0.021 | 1.206 | 0.423                       |
| Moderate                                   | -2.199  | -0.035 | 1.561 | 0.162                       | 1.739   | 0.016  | 2.731 | 0.730                       | 0.103         | 0.005  | 0.533 | 0.893                       | -2.552        | -0.047 | 1.349 | 0.053                       |
| Eating out/week                            |         |        |       |                             |         |        |       |                             |               |        |       |                             |               |        |       |                             |
| ≥7                                         | Ref     |        |       |                             | Ref     |        |       |                             | Ref           |        |       |                             | Ref           |        |       |                             |
| 5-6                                        | 2.599   | 0.047  | 1.025 | 0.017                       | 2.939   | 0.031  | 1.763 | 0.329                       | 0.107         | 0.005  | 0.374 | 0.782                       | 2.030         | 0.043  | 0.896 | 0.039                       |
| 1-4                                        | 2.142   | 0.012  | 3.110 | 0.480                       | 3.127   | 0.010  | 5.402 | 0.687                       | 0.036         | 0.001  | 1.225 | 0.975                       | 1.397         | 0.009  | 2.666 | 0.574                       |
| <1                                         | 8.908   | 0.028  | 6.882 | 0.255                       | 6.660   | 0.012  | 9.111 | 0.360                       | -0.848        | -0.007 | 1.800 | 0.673                       | 8.283         | 0.030  | 5.553 | 0.152                       |
| Walking/week                               |         |        |       |                             |         |        |       |                             |               |        |       |                             |               |        |       |                             |
| 0-1 day                                    | Ref     |        |       |                             | Ref     |        |       |                             | Ref           |        |       |                             | Ref           |        |       |                             |
| 2-4 days                                   | -1.422  | -0.020 | 1.799 | 0.410                       | -0.919  | -0.008 | 3.566 | 0.820                       | -0.371        | -0.014 | 0.658 | 0.774                       | -0.864        | -0.014 | 1.547 | 0.464                       |
| 5-6 days                                   | -1.349  | -0.022 | 1.693 | 0.292                       | -1.070  | -0.010 | 3.453 | 0.817                       | -0.092        | -0.004 | 0.626 | 0.966                       | -1.119        | -0.021 | 1.430 | 0.208                       |
| 7 days                                     | -3.466  | -0.064 | 1.554 | 0.024                       | -2.035  | -0.022 | 2.291 | 0.921                       | -0.021        | -0.001 | 0.594 | 0.932                       | -3.143        | -0.067 | 1.316 | 0.007                       |
| Exercise/week                              |         |        |       |                             |         |        |       |                             |               |        |       |                             |               |        |       |                             |
| Non                                        | Ref     |        |       |                             | Ref     |        |       |                             | Ref           |        |       |                             | Ref           |        |       |                             |
| 1-2days                                    | 1.528   | 0.023  | 1.210 | 0.208                       | -2.743  | -0.024 | 2.074 | 0.132                       | -0.374        | -0.016 | 0.416 | 0.501                       | 2.361         | 0.042  | 1.034 | 0.013                       |
| ≥3days                                     | 2.992   | 0.038  | 1.476 | 0.032                       | -3.400  | -0.025 | 2.544 | 0.194                       | 0.939         | 0.033  | 0.527 | 0.061                       | 3.018         | 0.045  | 1.305 | 0.027                       |
| <b>Mother variables</b>                    |         |        |       |                             |         |        |       |                             |               |        |       |                             |               |        |       |                             |
| Age (years)                                |         |        |       |                             |         |        |       |                             |               |        |       |                             |               |        |       |                             |
| 30-39                                      | Ref     |        |       |                             | Ref     |        |       |                             | Ref           |        |       |                             | Ref           |        |       |                             |

|    |                          |        |        |       |       |        |        |       |       |        |        |       |       |        |        |       |       |
|----|--------------------------|--------|--------|-------|-------|--------|--------|-------|-------|--------|--------|-------|-------|--------|--------|-------|-------|
| 1  |                          |        |        |       |       |        |        |       |       |        |        |       |       |        |        |       |       |
| 2  |                          |        |        |       |       |        |        |       |       |        |        |       |       |        |        |       |       |
| 3  | 40-49                    | -1.270 | -0.020 | 1.302 | 0.272 | -1.716 | -0.016 | 2.364 | 0.364 | -0.972 | -0.043 | 0.478 | 0.031 | 0.046  | 0.001  | 1.106 | 0.926 |
| 4  | 50-59                    | -6.554 | -0.065 | 2.165 | 0.003 | -6.270 | -0.036 | 3.780 | 0.149 | -2.071 | -0.057 | 0.725 | 0.009 | -3.230 | -0.037 | 1.868 | 0.126 |
| 5  | BMI (kg/m <sup>2</sup> ) |        |        |       |       |        |        |       |       |        |        |       |       |        |        |       |       |
| 6  | <23                      | Ref    |        |       |       |
| 7  | 23-24.9                  | -1.637 | -0.026 | 1.159 | 0.141 | -3.390 | -0.031 | 2.034 | 0.015 | 0.175  | 0.008  | 0.425 | 0.749 | -0.849 | -0.016 | 0.994 | 0.295 |
| 8  | ≥25                      | -2.467 | -0.040 | 1.221 | 0.024 | -4.209 | -0.040 | 2.297 | 0.002 | 0.612  | 0.028  | 0.448 | 0.261 | -1.513 | -0.029 | 1.073 | 0.090 |
| 9  | Smoking status           |        |        |       |       |        |        |       |       |        |        |       |       |        |        |       |       |
| 10 | Non                      | Ref    |        |       |       |
| 11 | Ex-Current               | 1.855  | 0.015  | 2.321 | 0.372 | -2.802 | -0.013 | 3.551 | 0.996 | -1.544 | -0.035 | 0.825 | 0.080 | 4.246  | 0.040  | 1.944 | 0.012 |
| 12 | Drinking status          |        |        |       |       |        |        |       |       |        |        |       |       |        |        |       |       |
| 13 | Non                      | Ref    |        |       |       |
| 14 | ≤1/month                 | 0.056  | 0.001  | 1.306 | 0.934 | 2.098  | 0.021  | 2.282 | 0.438 | -1.724 | -0.082 | 0.469 | <.001 | 1.168  | 0.023  | 1.112 | 0.231 |
| 15 | ≥2/month                 | -0.014 | 0.000  | 1.205 | 0.996 | 0.417  | 0.004  | 2.146 | 0.939 | -0.928 | -0.047 | 0.427 | 0.035 | 0.757  | 0.016  | 1.037 | 0.564 |
| 16 | Education level          |        |        |       |       |        |        |       |       |        |        |       |       |        |        |       |       |
| 17 | Elementary               | Ref    |        |       |       |
| 18 | Middle                   | 1.689  | 0.015  | 3.314 | 0.652 | 1.770  | 0.009  | 5.778 | 0.588 | -0.154 | -0.004 | 1.245 | 0.925 | 1.228  | 0.013  | 2.898 | 0.760 |
| 19 | High                     | -0.329 | -0.006 | 2.822 | 0.936 | 1.296  | 0.014  | 5.062 | 0.629 | -0.414 | -0.021 | 1.106 | 0.778 | -0.355 | -0.008 | 2.505 | 0.884 |
| 20 | University               | -1.680 | -0.029 | 2.911 | 0.638 | -1.693 | -0.017 | 5.212 | 0.860 | -0.299 | -0.015 | 1.037 | 0.895 | -1.301 | -0.026 | 2.565 | 0.668 |
| 21 | Income (1,000\)          |        |        |       |       |        |        |       |       |        |        |       |       |        |        |       |       |
| 22 | <1,000                   | Ref    |        |       |       |
| 23 | 1,000-1,999              | -1.700 | -0.027 | 2.010 | 0.521 | -1.408 | -0.013 | 3.858 | 0.592 | -0.460 | -0.020 | 0.727 | 0.561 | -0.964 | -0.018 | 1.710 | 0.731 |
| 24 | 2,000-2,999              | 0.419  | 0.007  | 1.976 | 0.748 | -1.328 | -0.014 | 3.682 | 0.775 | 0.105  | 0.005  | 0.715 | 0.934 | 0.485  | 0.010  | 1.685 | 0.707 |
| 25 | ≥3,000                   | 0.821  | 0.014  | 2.030 | 0.658 | -1.818 | -0.019 | 3.697 | 0.793 | 0.076  | 0.004  | 0.729 | 0.996 | 0.994  | 0.020  | 1.726 | 0.545 |
| 26 | Working hours            |        |        |       |       |        |        |       |       |        |        |       |       |        |        |       |       |
| 27 | Non                      | Ref    |        |       |       |
| 28 | Full-time                | 0.834  | 0.014  | 1.159 | 0.484 | 3.312  | 0.033  | 2.202 | 0.162 | 0.206  | 0.010  | 0.421 | 0.572 | -0.150 | -0.003 | 0.999 | 0.702 |
| 29 | Part time                | 0.279  | 0.003  | 1.592 | 0.986 | 0.496  | 0.003  | 2.649 | 0.658 | 0.008  | 0.000  | 0.598 | 0.797 | 0.068  | 0.001  | 1.330 | 0.989 |
| 30 | Eating out/week          |        |        |       |       |        |        |       |       |        |        |       |       |        |        |       |       |
| 31 | ≥7                       | Ref    |        |       |       |
| 32 | 5-6                      | 1.637  | 0.025  | 1.754 | 0.381 | 3.492  | 0.031  | 2.735 | 0.309 | -0.868 | -0.036 | 0.605 | 0.122 | 1.868  | 0.033  | 1.583 | 0.157 |
| 33 | 1-4                      | 0.539  | 0.010  | 1.615 | 0.686 | 3.111  | 0.033  | 2.646 | 0.555 | -0.372 | -0.019 | 0.572 | 0.472 | 0.374  | 0.008  | 1.463 | 0.588 |
| 34 | <1                       | 1.652  | 0.025  | 1.763 | 0.263 | 4.206  | 0.037  | 3.188 | 0.534 | -0.119 | -0.005 | 0.630 | 0.889 | 1.088  | 0.019  | 1.600 | 0.331 |

\*Based on body mass index (kg/m<sup>2</sup>) for age percentiles in male and female

†P values determined by log normal distributions

BMI, body mass index; HDL-C, high-density lipoprotein cholesterol; LDL-C, low-density lipoprotein cholesterol; SD, standard deviation; S.B., standardized beta; S.E., standard error; TC, total cholesterol; TG, triglyceride.

**Table 3** Subgroup analyses based on sex and mother characteristics

|                         |                          | TC & TC     |       |       |                | TG & TG   |       |       |                | HDL-C & HDL-C |       |       |                | LDL-C & LDL-C |       |       |                |       |
|-------------------------|--------------------------|-------------|-------|-------|----------------|-----------|-------|-------|----------------|---------------|-------|-------|----------------|---------------|-------|-------|----------------|-------|
|                         |                          | $\beta^*$   | S.B.  | S.E.  | <i>P</i> value | $\beta^*$ | S.B.  | S.E.  | <i>P</i> value | $\beta^*$     | S.B.  | S.E.  | <i>P</i> value | $\beta^*$     | S.B.  | S.E.  | <i>P</i> value |       |
| Sex                     |                          |             |       |       |                |           |       |       |                |               |       |       |                |               |       |       |                |       |
|                         | Male                     | 1522 (52.8) | 0.221 | 0.258 | 0.021          | <.001     | 0.199 | 0.245 | 0.021          | <.001         | 0.215 | 0.273 | 0.020          | <.001         | 0.228 | 0.274 | 0.021          | <.001 |
|                         | Female                   | 1362 (47.2) | 0.244 | 0.299 | 1.510          | <.001     | 0.122 | 0.181 | 0.020          | <.001         | 0.271 | 0.331 | 0.022          | <.001         | 0.250 | 0.312 | 0.021          | <.001 |
| <b>Mother variables</b> |                          |             |       |       |                |           |       |       |                |               |       |       |                |               |       |       |                |       |
|                         | Age (years)              |             |       |       |                |           |       |       |                |               |       |       |                |               |       |       |                |       |
|                         | 30-39                    | 505 (17.5)  | 0.228 | 0.274 | 0.036          | <.001     | 0.150 | 0.186 | 0.040          | <.001         | 0.224 | 0.278 | 0.038          | <.001         | 0.247 | 0.315 | 0.035          | <.001 |
|                         | 40-49                    | 2154 (74.7) | 0.239 | 0.273 | 0.018          | <.001     | 0.164 | 0.210 | 0.017          | <.001         | 0.250 | 0.302 | 0.018          | <.001         | 0.250 | 0.292 | 0.018          | <.001 |
|                         | 50-59                    | 225 (7.8)   | 0.099 | 0.127 | 0.053          | 0.062     | 0.157 | 0.291 | 0.039          | <.001         | 0.207 | 0.287 | 0.051          | <.001         | 0.058 | 0.081 | 0.048          | 0.230 |
|                         | BMI (kg/m <sup>2</sup> ) |             |       |       |                |           |       |       |                |               |       |       |                |               |       |       |                |       |
|                         | <25                      | 2114 (73.3) | 0.249 | 0.288 | 0.018          | <.001     | 0.185 | 0.221 | 0.018          | <.001         | 0.250 | 0.313 | 0.017          | <.001         | 0.265 | 0.315 | 0.017          | <.001 |
|                         | ≥25                      | 770 (26.7)  | 0.172 | 0.202 | 0.030          | <.001     | 0.129 | 0.183 | 0.025          | <.001         | 0.180 | 0.189 | 0.034          | <.001         | 0.168 | 0.203 | 0.030          | <.001 |
|                         | Education level          |             |       |       |                |           |       |       |                |               |       |       |                |               |       |       |                |       |
|                         | Elementary               | 96 (3.3)    | 0.154 | 0.185 | 0.111          | 0.171     | 0.212 | 0.287 | 0.105          | 0.047         | 0.056 | 0.064 | 0.110          | 0.616         | 0.136 | 0.185 | 0.098          | 0.171 |
|                         | Middle                   | 177 (6.1)   | 0.222 | 0.240 | 0.073          | 0.003     | 0.241 | 0.055 | 0.379          | <.001         | 0.133 | 0.187 | 0.060          | 0.028         | 0.279 | 0.316 | 0.065          | <.001 |
|                         | High                     | 1624 (56.3) | 0.226 | 0.264 | 0.021          | <.001     | 0.141 | 0.190 | 0.019          | <.001         | 0.257 | 0.314 | 0.020          | <.001         | 0.226 | 0.268 | 0.021          | <.001 |
|                         | University               | 987 (34.2)  | 0.233 | 0.278 | 0.026          | <.001     | 0.174 | 0.209 | 0.028          | <.001         | 0.247 | 0.296 | 0.027          | <.001         | 0.253 | 0.314 | 0.025          | <.001 |
|                         | Dyslipidemia†            |             |       |       |                |           |       |       |                |               |       |       |                |               |       |       |                |       |
|                         | No                       | 2587 (89.7) | 0.259 | 0.257 | 0.019          | <.001     | 0.190 | 0.232 | 0.017          | <.001         | 0.255 | 0.305 | 0.016          | <.001         | 0.263 | 0.273 | 0.018          | <.001 |
|                         | Yes                      | 297 (10.3)  | 0.121 | 0.182 | 0.040          | 0.003     | 0.096 | 0.189 | 0.032          | 0.003         | 0.151 | 0.222 | 0.045          | 0.001         | 0.137 | 0.224 | 0.035          | <.001 |
|                         | Economic activity        |             |       |       |                |           |       |       |                |               |       |       |                |               |       |       |                |       |
|                         | No                       | 1679 (58.2) | 0.202 | 0.240 | 0.020          | <.001     | 0.186 | 0.251 | 0.019          | <.001         | 0.258 | 0.325 | 0.019          | <.001         | 0.205 | 0.250 | 0.019          | <.001 |
|                         | Yes                      | 1205 (41.8) | 0.267 | 0.308 | 0.024          | <.001     | 0.121 | 0.159 | 0.024          | <.001         | 0.214 | 0.251 | 0.025          | <.001         | 0.280 | 0.332 | 0.023          | <.001 |

The other covariates were adjusted for these regressions.

\*An amount change in adolescents' lipid levels by each unit increase of their mothers' lipids

†Included cases diagnosed and/or treated with dyslipidemia, and cases with cholesterol level above 240mg/dl.

BMI, body mass index; HDL-C, high-density lipoprotein cholesterol; LDL-C, low-density lipoprotein cholesterol; SD, standard deviation; S.B., standardized beta; S.E., standard error; TC, total cholesterol; TG, triglyceride.

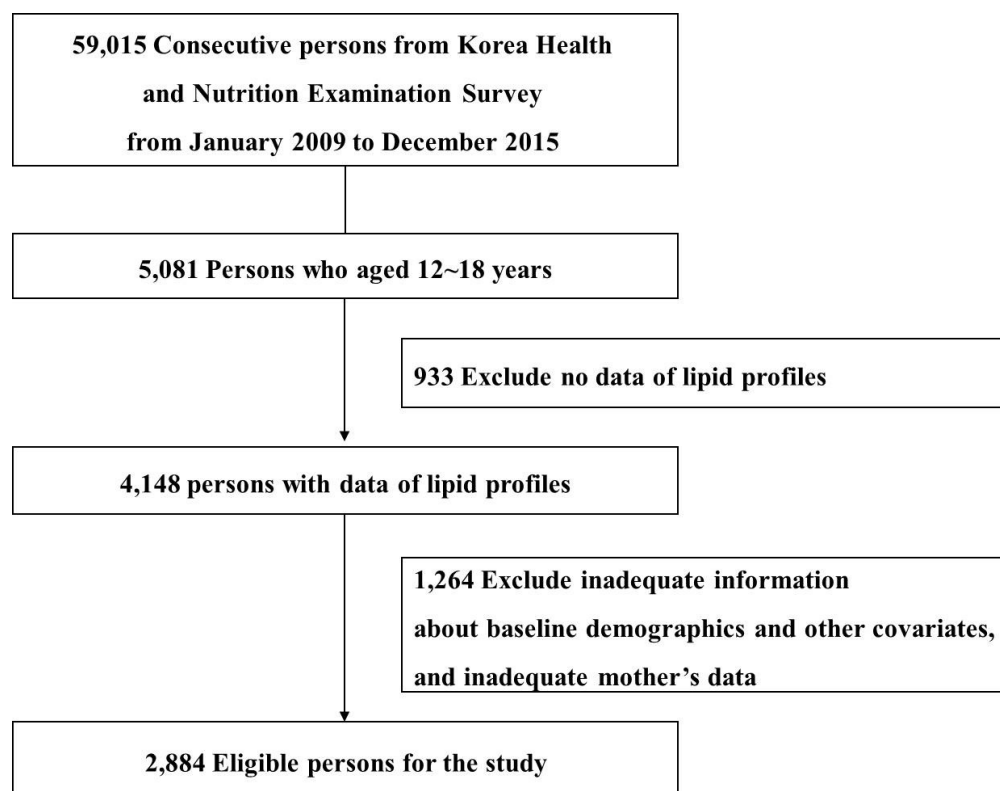

34 Figure 1 Study flow showing sample selection. We selected 2,884 adolescents aged 12–18 whose mothers'  
35 data were also available.

36  
37 104x90mm (300 x 300 DPI)



Figure 2 Bar graphs showing standardized beta coefficients of adolescent's lipids for each unit increase of their mother's lipids in subgroups. HDL-C, high-density lipoprotein cholesterol; LDL-C, low-density lipoprotein cholesterol; TC, total cholesterol; TG, triglyceride.

124x90mm (300 x 300 DPI)

TC

$P < .0001$

TG

$P < .0001$



HDL-C

$P < .0001$

LDL-C

$P < .0001$



**Supplementary Figure S1** Dot plots of correlations between adolescent's and mother's lipids.

HDL-C, high-density lipoprotein cholesterol; LDL-C, low-density lipoprotein cholesterol; TC, total cholesterol; TG, triglyceride.

1  
2  
3  
4  
5  
6  
7  
8  
9  
10  
11  
12  
13  
14  
15  
16  
17  
18  
19  
20  
21  
22  
23  
24  
25  
26  
27  
28  
29  
30  
31  
32  
33  
34  
35  
36  
37  
38  
39  
40  
41  
42  
43  
44  
45  
46  
47

**Supplementary Table S1** Adjusted R squares for regression models of lipid profiles between adolescent and mother

| Adjusted R <sup>2</sup> |       | Adolescents   |               |               |               |
|-------------------------|-------|---------------|---------------|---------------|---------------|
|                         |       | TC            | TG            | HDL-C         | LDL-C         |
| Mothers                 | TC    | <b>0.1245</b> | 0.0296        | 0.0723        | 0.1095        |
|                         | TG    | 0.0585        | <b>0.0692</b> | 0.0678        | 0.0445        |
|                         | HDL-C | 0.0592        | 0.0424        | <b>0.1400</b> | 0.0442        |
|                         | LDL-C | 0.1164        | 0.0288        | 0.0640        | <b>0.1218</b> |

The other covariates were adjusted for these regressions.  
HDL-C, high-density lipoprotein cholesterol; LDL-C, low-density lipoprotein cholesterol; TC, total cholesterol; TG, triglyceride.

For peer review only



**Supplementary Table S2** Adjusted odds ratios for risks of adolescents' dyslipidemia based on mothers' lipids

|                 |               | Adolescents' lipids |             | OR         | 95% CI     | P value    |       |
|-----------------|---------------|---------------------|-------------|------------|------------|------------|-------|
| Mothers' lipids | TG (mg/dl)    | ≤150                | >150        |            |            |            |       |
|                 |               | ≤150                | 2266 (84.9) | 157 (73.0) | ref        |            |       |
|                 |               | >150                | 403 (15.1)  | 58 (27.0)  | 2.15       | 1.52, 3.03 | <.001 |
|                 | LDL-C (mg/dl) | ≤150                | >150        |            |            |            |       |
|                 |               | ≤150                | 2581 (90.8) | 31 (72.1)  | ref        |            |       |
|                 |               | >150                | 260 (9.2)   | 12 (27.9)  | 3.42       | 1.68, 7.00 | <.001 |
|                 | HDL-C (mg/dl) | <40                 | ≥40         |            |            |            |       |
|                 |               | <40                 | 84 (22.0)   | 215 (8.6)  | ref        |            |       |
|                 | ≥40           | 298 (78.0)          | 2287 (91.4) | 0.33       | 0.24, 0.44 | <.001      |       |

The other covariates (baseline and clinical characteristics, health behavioral factors) were adjusted for these regressions

CI, confidence interval; HDL-C, high-density lipoprotein cholesterol; LDL-C, low-density lipoprotein cholesterol; OR, odds ratio; TG, triglyceride.

**Supplementary Table S3** Sensitivity test: Demographics and lipid profiles in 4,148 adolescents\* aged 12-18 years

|                 | No. (%)     | TC    |      |                             | TG    |      |                             | HDL-C <sup>†</sup> |      |                             | LDL-C <sup>§</sup> |      |                             |
|-----------------|-------------|-------|------|-----------------------------|-------|------|-----------------------------|--------------------|------|-----------------------------|--------------------|------|-----------------------------|
|                 |             | Mean  | SD   | <i>P</i> value <sup>†</sup> | Mean  | SD   | <i>P</i> value <sup>†</sup> | Mean               | SD   | <i>P</i> value <sup>†</sup> | Mean               | SD   | <i>P</i> value <sup>†</sup> |
| All (n=4148)    |             | 156.5 | 26.9 |                             | 83.9  | 47.0 |                             | 50.3               | 9.8  |                             | 89.5               | 23.1 |                             |
| Age (years)     |             |       |      | 0.252                       |       |      | 0.459                       |                    |      | 0.013                       |                    |      | 0.996                       |
| 12-14           | 1959 (47.2) | 156.9 | 26.4 |                             | 84.9  | 48.0 |                             | 50.7               | 9.7  |                             | 89.4               | 22.8 |                             |
| 15-18           | 2189 (52.8) | 156.2 | 27.3 |                             | 83.0  | 46.1 |                             | 49.9               | 9.8  |                             | 89.6               | 23.4 |                             |
| Sex             |             |       |      | <.001                       |       |      | 0.313                       |                    |      | <.001                       |                    |      | <.001                       |
| Male            | 2215 (53.4) | 151.4 | 26.8 |                             | 84.5  | 50.1 |                             | 48.6               | 9.4  |                             | 86.0               | 23.1 |                             |
| Female          | 1933 (46.6) | 162.4 | 25.8 |                             | 83.3  | 43.2 |                             | 52.3               | 9.8  |                             | 93.4               | 22.4 |                             |
| BMI*            |             |       |      | 0.024                       |       |      | <.001                       |                    |      | <.001                       |                    |      | <.001                       |
| <85%            | 3733 (90.0) | 156.0 | 26.5 |                             | 81.1  | 44.9 |                             | 51.0               | 9.7  |                             | 88.8               | 22.7 |                             |
| ≥85%            | 415 (10.0)  | 160.9 | 30.3 |                             | 108.8 | 57.1 |                             | 44.1               | 7.9  |                             | 95.0               | 26.0 |                             |
| Glucose (mg/dl) |             |       |      | 0.166                       |       |      | 0.134                       |                    |      | 0.765                       |                    |      | 0.142                       |
| ≤100            | 3935 (94.9) | 156.3 | 26.6 |                             | 83.5  | 46.7 |                             | 50.3               | 9.7  |                             | 89.3               | 22.8 |                             |
| >100            | 213 (5.1)   | 160.0 | 32.5 |                             | 90.4  | 52.7 |                             | 50.2               | 10.2 |                             | 92.8               | 27.9 |                             |

\*Included 1264 adolescents who have no mothers' data or inadequate baseline information

<sup>†</sup>*P* values determined by log normal distributions

<sup>‡</sup>Included 42 missing data (n=4106)

<sup>§</sup>Included 43 missing data (n=4105)

BMI, body mass index; HDL-C, high-density lipoprotein cholesterol; LDL-C, low-density lipoprotein cholesterol; SD, standard deviation; TC, total cholesterol; TG, triglyceride.

**STROBE 2007 (v4) Statement—Checklist of items that should be included in reports of *cross-sectional studies***

| Section/Topic                | Item # | Recommendation                                                                                                                                                                       | Reported on page # |
|------------------------------|--------|--------------------------------------------------------------------------------------------------------------------------------------------------------------------------------------|--------------------|
| <b>Title and abstract</b>    | 1      | (a) Indicate the study's design with a commonly used term in the title or the abstract                                                                                               | #1, #2             |
|                              |        | (b) Provide in the abstract an informative and balanced summary of what was done and what was found                                                                                  | #2, #3, #4         |
| <b>Introduction</b>          |        |                                                                                                                                                                                      |                    |
| Background/rationale         | 2      | Explain the scientific background and rationale for the investigation being reported                                                                                                 | #5                 |
| Objectives                   | 3      | State specific objectives, including any prespecified hypotheses                                                                                                                     | #5, #6             |
| <b>Methods</b>               |        |                                                                                                                                                                                      |                    |
| Study design                 | 4      | Present key elements of study design early in the paper                                                                                                                              | #6                 |
| Setting                      | 5      | Describe the setting, locations, and relevant dates, including periods of recruitment, exposure, follow-up, and data collection                                                      | #6, #7             |
| Participants                 | 6      | (a) Give the eligibility criteria, and the sources and methods of selection of participants                                                                                          | #6                 |
| Variables                    | 7      | Clearly define all outcomes, exposures, predictors, potential confounders, and effect modifiers. Give diagnostic criteria, if applicable                                             | #6, #7             |
| Data sources/<br>measurement | 8*     | For each variable of interest, give sources of data and details of methods of assessment (measurement). Describe comparability of assessment methods if there is more than one group | #7                 |
| Bias                         | 9      | Describe any efforts to address potential sources of bias                                                                                                                            | #7, #8             |
| Study size                   | 10     | Explain how the study size was arrived at                                                                                                                                            | #6                 |
| Quantitative variables       | 11     | Explain how quantitative variables were handled in the analyses. If applicable, describe which groupings were chosen and why                                                         | #7, #8             |
| Statistical methods          | 12     | (a) Describe all statistical methods, including those used to control for confounding                                                                                                | #7, #8             |
|                              |        | (b) Describe any methods used to examine subgroups and interactions                                                                                                                  | #8                 |
|                              |        | (c) Explain how missing data were addressed                                                                                                                                          | #6                 |
|                              |        | (d) If applicable, describe analytical methods taking account of sampling strategy                                                                                                   | #8                 |
|                              |        | (e) Describe any sensitivity analyses                                                                                                                                                | #8                 |
| <b>Results</b>               |        |                                                                                                                                                                                      |                    |

|                          |     |                                                                                                                                                                                                              |                    |
|--------------------------|-----|--------------------------------------------------------------------------------------------------------------------------------------------------------------------------------------------------------------|--------------------|
| Participants             | 13* | (a) Report numbers of individuals at each stage of study—eg numbers potentially eligible, examined for eligibility, confirmed eligible, included in the study, completing follow-up, and analysed            | #6                 |
|                          |     | (b) Give reasons for non-participation at each stage                                                                                                                                                         | #6                 |
|                          |     | (c) Consider use of a flow diagram                                                                                                                                                                           | #6                 |
| Descriptive data         | 14* | (a) Give characteristics of study participants (eg demographic, clinical, social) and information on exposures and potential confounders                                                                     | #8, #9             |
|                          |     | (b) Indicate number of participants with missing data for each variable of interest                                                                                                                          | #6                 |
| Outcome data             | 15* | Report numbers of outcome events or summary measures                                                                                                                                                         | #8                 |
| Main results             | 16  | (a) Give unadjusted estimates and, if applicable, confounder-adjusted estimates and their precision (eg, 95% confidence interval). Make clear which confounders were adjusted for and why they were included | #8, #9, #10        |
|                          |     | (b) Report category boundaries when continuous variables were categorized                                                                                                                                    | #7                 |
|                          |     | (c) If relevant, consider translating estimates of relative risk into absolute risk for a meaningful time period                                                                                             | #9, #10            |
| Other analyses           | 17  | Report other analyses done—eg analyses of subgroups and interactions, and sensitivity analyses                                                                                                               | #10, #11           |
| <b>Discussion</b>        |     |                                                                                                                                                                                                              |                    |
| Key results              | 18  | Summarise key results with reference to study objectives                                                                                                                                                     | #11                |
| Limitations              | 19  | Discuss limitations of the study, taking into account sources of potential bias or imprecision. Discuss both direction and magnitude of any potential bias                                                   | #14, #15           |
| Interpretation           | 20  | Give a cautious overall interpretation of results considering objectives, limitations, multiplicity of analyses, results from similar studies, and other relevant evidence                                   | #11, #12, #13, #14 |
| Generalisability         | 21  | Discuss the generalisability (external validity) of the study results                                                                                                                                        | #11                |
| <b>Other information</b> |     |                                                                                                                                                                                                              |                    |
| Funding                  | 22  | Give the source of funding and the role of the funders for the present study and, if applicable, for the original study on which the present article is based                                                | #15                |

\*Give information separately for cases and controls in case-control studies and, if applicable, for exposed and unexposed groups in cohort and cross-sectional studies.

**Note:** An Explanation and Elaboration article discusses each checklist item and gives methodological background and published examples of transparent reporting. The STROBE checklist is best used in conjunction with this article (freely available on the Web sites of PLoS Medicine at <http://www.plosmedicine.org/>, Annals of Internal Medicine at <http://www.annals.org/>, and Epidemiology at <http://www.epidem.com/>). Information on the STROBE Initiative is available at [www.strobe-statement.org](http://www.strobe-statement.org).

# BMJ Open

## Associations between lipid profiles of adolescents and their mothers based on a nationwide health and nutrition survey in South Korea

|                                 |                                                                                                                                                                                                                                                                                                                                                                                                                                                                                                                                                                                                                                                                                                                                                                                                                                                                                                                                                                                                                              |
|---------------------------------|------------------------------------------------------------------------------------------------------------------------------------------------------------------------------------------------------------------------------------------------------------------------------------------------------------------------------------------------------------------------------------------------------------------------------------------------------------------------------------------------------------------------------------------------------------------------------------------------------------------------------------------------------------------------------------------------------------------------------------------------------------------------------------------------------------------------------------------------------------------------------------------------------------------------------------------------------------------------------------------------------------------------------|
| Journal:                        | <i>BMJ Open</i>                                                                                                                                                                                                                                                                                                                                                                                                                                                                                                                                                                                                                                                                                                                                                                                                                                                                                                                                                                                                              |
| Manuscript ID                   | bmjopen-2018-024731.R3                                                                                                                                                                                                                                                                                                                                                                                                                                                                                                                                                                                                                                                                                                                                                                                                                                                                                                                                                                                                       |
| Article Type:                   | Research                                                                                                                                                                                                                                                                                                                                                                                                                                                                                                                                                                                                                                                                                                                                                                                                                                                                                                                                                                                                                     |
| Date Submitted by the Author:   | 23-Jan-2019                                                                                                                                                                                                                                                                                                                                                                                                                                                                                                                                                                                                                                                                                                                                                                                                                                                                                                                                                                                                                  |
| Complete List of Authors:       | Nam, Ji Hyung; Department of Internal Medicine, Dongguk University Ilsan Hospital, Dongguk University College of Medicine; Department of Medicine, Graduate School, Yonsei University<br>Shin, Jaeyong ; Department of Preventive Medicine & Institute of Health Services Research, Yonsei University College of Medicine<br>Jang, Sung-In; College of Medicine Yonsei University, Department of Preventive Medicine<br>Kim, Ji Hyun ; Department of Pediatrics, Dongguk University Ilsan Hospital, Dongguk University College of Medicine<br>Han, Kyu-Tae ; Division of Cancer Management Policy, National Cancer Center<br>Lee, Jun Kyu ; Department of Internal Medicine, Dongguk University Ilsan Hospital, Dongguk University College of Medicine<br>Lim, Yun Jeong ; Department of Internal Medicine, Dongguk University Ilsan Hospital, Dongguk University College of Medicine<br>Park, Eun-Cheol; Yonsei University College of Medicine, Department of Preventive Medicine and Institute of Health Services Research |
| <b>Primary Subject Heading</b>: | Public health                                                                                                                                                                                                                                                                                                                                                                                                                                                                                                                                                                                                                                                                                                                                                                                                                                                                                                                                                                                                                |
| Secondary Subject Heading:      | Paediatrics                                                                                                                                                                                                                                                                                                                                                                                                                                                                                                                                                                                                                                                                                                                                                                                                                                                                                                                                                                                                                  |
| Keywords:                       | Dyslipidemia, Cholesterol, Lipids, Adolescent, Mother                                                                                                                                                                                                                                                                                                                                                                                                                                                                                                                                                                                                                                                                                                                                                                                                                                                                                                                                                                        |
|                                 |                                                                                                                                                                                                                                                                                                                                                                                                                                                                                                                                                                                                                                                                                                                                                                                                                                                                                                                                                                                                                              |

SCHOLARONE™  
Manuscripts

1  
2  
3  
4 1 **Associations between lipid profiles of adolescents and their mothers based**  
5  
6 2 **on a nationwide health and nutrition survey in South Korea**  
7  
8  
9 3

10 4 Ji Hyung Nam,<sup>1,2</sup> Jaeyong Shin,<sup>3</sup> Sung-In Jang,<sup>3</sup> Ji Hyun Kim,<sup>4</sup> Kyu-Tae Han,<sup>5</sup> Jun Kyu Lee,<sup>1</sup>  
11  
12  
13 5 Yun Jeong Lim,<sup>1</sup> Eun-Cheol Park<sup>3</sup>  
14  
15 6

16  
17  
18 7 <sup>1</sup> Department of Internal Medicine, Dongguk University Ilsan Hospital, Dongguk University  
19  
20 8 College of Medicine, Goyang, Republic of Korea

21  
22 9 <sup>2</sup> Department of Medicine, Graduate School, Yonsei University, Seoul, Republic of Korea

23  
24  
25 10 <sup>3</sup> Department of Preventive Medicine & Institute of Health Services Research, Yonsei  
26  
27 11 University College of Medicine, Seoul, Republic of Korea

28  
29 12 <sup>4</sup> Department of Pediatrics, Dongguk University Ilsan Hospital, Dongguk University College  
30  
31 13 of Medicine, Goyang, Republic of Korea

32  
33  
34 14 <sup>5</sup> Division of Cancer Management Policy, National Cancer Center, Goyang, Republic of  
35  
36 15 Korea

37  
38  
39 16  
40  
41 17 Correspondence to

42  
43 18 Eun-Cheol Park, MD, PhD

44  
45 19 Department of Preventive Medicine & Institute of Health Services Research

46  
47 20 Yonsei University College of Medicine

48  
49 21 50-1 Yonsei-ro, Seodaemun-gu, Seoul, 03722, Republic of Korea

50  
51  
52 22 Phone number: 82-2-2228-1862 / Fax number: 82-2-392-8133

53  
54 23 E-mail: [ecpark@yuhs.ac](mailto:ecpark@yuhs.ac)  
55  
56  
57 24  
58  
59 25  
60

## 26 ABSTRACT

27 **Objectives** Dyslipidemia is a metabolic disease influenced by environmental and genetic  
28 factors. Especially family history related to the genetic backgrounds is a strong risk factor of  
29 lipid abnormality. The aim of this study is to evaluate the association between the lipid  
30 profiles of adolescents and their mothers.

31 **Design** A cross-sectional study.

32 **Setting** The data were derived from the Korea National Health and Nutrition Examination  
33 Survey (KNHANES IV-VI) between 2009 and 2015.

34 **Participants** 2,884 adolescents aged 12-18 years and their mothers were included.

35 **Primary outcome measures** Outcome variables were adolescents' lipid levels. Mothers'  
36 lipid levels were interesting variables. The lipid profiles included total cholesterol (TC),  
37 triglyceride (TG), high-density lipoprotein cholesterol (HDL-C), and low-density lipoprotein  
38 cholesterol (LDL-C). We identified partial correlation coefficients ( $r$ ) between the lipids.  
39 Multiple linear regressions were performed to identify an amount change in adolescents' lipid  
40 levels by each unit increase of their mothers' lipids. The regression models included various  
41 clinical characteristics and health behavioral factors of both adolescents and mothers.

42 **Results** The mean levels of adolescents' lipids were 156.6, 83.6, 50.4, and 89.4 mg/dL,  
43 respectively for TC, TG, HDL-C, and LDL-C. Positive correlations between lipid levels of  
44 adolescents and mothers were observed for TC, TG, HDL-C, and LDL-C ( $r$ , 95% confidence  
45 interval = 0.271, 0.236–0.304; 0.204, 0.169–0.239; 0.289, 0.255–0.322; and 0.286, 0.252–  
46 0.319). Adolescent TC level was increased by 0.23 mg/dL for each unit increase of their  
47 mother's TC (standard error (SE), 0.02;  $P<.001$ ). The  $\beta$  coefficients were 0.16 (SE, 0.01),  
48 0.24 (SE, 0.02), and 0.24 (SE, 0.02), respectively, in each model of TG, HDL-C, and LDL-C  
49 (all  $P<.001$ ). The linear relationships were significant regardless of sex and mother  
50 characteristics.

1  
2  
3  
4  
5  
6  
7  
8  
9  
10  
11  
12  
13  
14  
15  
16  
17  
18  
19  
20  
21  
22  
23  
24  
25  
26  
27  
28  
29  
30  
31  
32  
33  
34  
35  
36  
37  
38  
39  
40  
41  
42  
43  
44  
45  
46  
47  
48  
49  
50  
51  
52  
53  
54  
55  
56  
57  
58  
59  
60

51 **Conclusions** Mothers' lipid levels are associated with adolescents' lipids, therefore, it can  
52 serve as a reference for the screening of adolescent's dyslipidemia.

53 **Keywords:** Dyslipidemia, Cholesterol, Lipids, Adolescent, Mother.

For peer review only



1  
2  
3 76 **Strengths and limitations of this study**  
4

5 77 ▶This study analyzed linear relationships of lipid profiles between adolescents and their  
6  
7  
8 78 mothers using a large national database.

9  
10 79 ▶We used survey based statistical analyses based on the design effect related to survey  
11  
12 80 sampling.

13  
14  
15 81 ▶Various health behavioral factors of adolescents and mothers were adjusted.

16  
17 82 ▶There is no causal relationship as this was a cross-sectional study.

18  
19 83 ▶The study did not provide any information on nutritional factors which could be significant  
20  
21 84 confounders.  
22  
23

24 85

25 86

26 87

27 88

28 89

29 90

30 91

31 92

32 93

33 94

34 95

35 96

36 97

37 98

38 99

39 100

## 101 INTRODUCTION

102 Dyslipidemia is a well-known risk factor for cardiovascular disease (CVD) in individuals of  
103 all ages.<sup>1</sup> In Korea, CVD is the second-leading cause of death after cancer.<sup>2</sup> Triglyceride  
104 (TG) and high-density lipoprotein cholesterol (HDL-C) are major components of metabolic  
105 syndrome (MetS). Likewise, the TG to HDL-C ratio, a predictor for small dense low-density  
106 lipoprotein cholesterol (LDL-C), is an independent determinant of arterial stiffness in  
107 adolescents and young adult,<sup>3</sup> which can subsequently accelerate atherosclerosis and increase  
108 cardiovascular events in the second decade of life.<sup>4</sup> Meanwhile, lipid level is strongly linked  
109 to the body mass index (BMI), which is one of the reliable indicators for obesity in  
110 adolescents.<sup>5</sup> Pediatric obesity is affected by various family settings such as eating habits,  
111 lifestyle, and education.<sup>6</sup> The prevalence of pediatric obesity in South Korea has been  
112 increased rapidly from 5.8% in 1997 to 11.5% in 201,<sup>7</sup> which is close to the 13.3% in the  
113 United States.<sup>8</sup> This has increased interest in obesity-related disorders in adolescence, such as  
114 metabolic, cardiovascular, or psychosocial complication.<sup>9</sup> Obesity and dyslipidemia is no  
115 longer the problem of adults alone, therefore, adequate screening and control of dyslipidemia  
116 in adolescence has become important in South Korea.

117  
118 In addition to obesity, various factors such as physical activity, economic status, education  
119 level, nutritional and dietary factors, sleep duration, and psychiatric problems, among others,  
120 have been associated with lipid concentration.<sup>10-12</sup> Meanwhile, family histories usually  
121 provide important information regarding pediatric diseases.<sup>13</sup> Regarding the highly heritable  
122 traits of dyslipidemia, several studies showed that there was a close relationship in the lipid  
123 concentration between parents and their offspring.<sup>14-16</sup> This familial clustering implies that  
124 there may be common denominators including health behavioral factors within a family as  
125 well as genetic backgrounds. In the present study, we investigated clinical and health

1  
2  
3 126 behavioral factors affecting adolescents' lipid levels, and evaluated the association between  
4  
5 127 the lipid profiles of adolescents and their mothers.  
6  
7  
8 128

## 10 129 **METHODS**

### 13 130 **Data source**

15 131 This is a cross-sectional study using a secondary data of the Korea National Health and  
16  
17 132 Nutrition Examination Survey (KNHANES). KNHANES is an ongoing surveillance system  
18  
19 133 conducted by Korea Centers for Disease Control and Prevention (KCDC) since 1998 that  
20  
21 134 assesses health and nutrition status, and monitors health risk factors and the prevalence of  
22  
23 135 chronic diseases.<sup>17</sup> A special survey team visits four regions every week (192 regions per  
24  
25 136 year) and conducts a health examination, health interview, and nutrition survey. This survey  
26  
27 137 includes a representative sample of the population selected using a stratified, multi-stage, and  
28  
29 138 clustered sampling method. Sampling units are district, survey area, and household.  
30  
31 139 Stratification variables are city/province, district, and housing type. The sample is weighted  
32  
33 140 to reflect sampling rate, response rate, and population demographics in order to estimate  
34  
35 141 health consciousness, health behavior, and nutritional status on behalf of the population.  
36  
37  
38  
39  
40  
41  
42

43 143 Among 59,015 individuals who were surveyed in KNHANES between 2009 and 2015, we  
44  
45 144 selected 4,148 adolescents aged 12–18 years with available lipid profile data. Next, we  
46  
47 145 obtained data for the mothers of these adolescents during the same survey period by matching  
48  
49 146 household identification numbers. After the exclusion of 1,264 individuals with missing  
50  
51 147 information about adolescent's or mother's baseline characteristics or clinical findings, 2,884  
52  
53 148 adolescents were eligible for the study (Figure 1). Use of the data from KNHANES was  
54  
55 149 approved by the Institutional Review Board of the KCDC (2009-01CON-03-2C, 2010-  
56  
57 02CON-21-C, 2011-02CON-06-C, 2012-01EXP-01-2C, 2013-07CON-03-4C, and 2013-  
58  
59 150

1  
2  
3 151 12EXP-03-5C). This survey has been available for use without approval since 2015.  
4  
5  
6 152

7  
8 153 **Outcome variables and health behavioral factors**  
9

10 154 Both adolescent's and mother's lipid profiles consisted of total cholesterol (TC), TG, HDL-C,  
11  
12 155 and LDL-C. Outcome variables in the study were adolescents' lipid levels. Mothers' lipid  
13  
14 156 levels, which represent genetic linkage, were interesting variables. In order to examine their  
15  
16 157 relationship, we adjusted various clinical and health behavioral factors of both adolescents  
17  
18 158 and mothers. The level of LDL-C was calculated using the Friedewald equation. If the TG  
19  
20 159 level was 400 mg/dL or more, measurement of LDL-C was performed by using the  
21  
22 160 immunochemical method. Adolescents were divided into two age groups based on whether  
23  
24 161 they were high school students. In terms of obesity, we divided the study subjects into two  
25  
26 162 groups using an 85% cut-off of the body mass index (BMI) based on the age groups and sex  
27  
28 163 for adolescents, and divided into three groups ( $<23$ ,  $23-24.9$ ,  $\geq 25$  kg/m<sup>2</sup>) for mothers.<sup>18 19</sup>  
29  
30  
31 164 The values of fasting glucose were also divided into two groups based on the level of  
32  
33 165 impaired fasting glucose ( $\geq 100$  mg/dL). Degree of stress was divided into three groups based  
34  
35 166 on individuals' perception. In addition, frequency of eating out, walking, and exercise per  
36  
37 167 week were investigated for adolescent health behaviors.  
38  
39  
40  
41  
42  
43  
44  
45 168

46 169 For mothers' variables, we used data regarding smoking and alcohol habits, degree of  
47  
48 170 education and family income, economic activity, and frequency of eating out per week.  
49  
50 171 Mother's dyslipidemia was defined based on TC level of 240 mg/dL or more, and included  
51  
52 172 cases of individuals diagnosed or treated with dyslipidemia even if the TC level was normal.  
53  
54  
55

56 173

57  
58 174 **Statistical methods**  
59  
60

1  
2  
3 175 Lipid profiles were analyzed as continuous variables with mean and standard deviation (SD)  
4  
5 176 in both adolescents and their mothers. We checked whether the continuous variables were  
6  
7 177 normally distributed, and used a log scale depending on the results. Independent sample *t*-  
8  
9 178 tests or one-way analysis of variances (ANOVA) was used for categorical independent  
10  
11 179 variables to analyze the relationship with adolescents' lipid levels. The correlation of lipid  
12  
13 180 levels between adolescents and their mothers was analyzed using partial correlations (*r*) with  
14  
15 181 95% confidence interval (CI). The *r* values were interpreted as slight (>0–0.2), fair (>0.2–  
16  
17 182 0.4), moderate (>0.4–0.6), substantial (>0.6–0.8), and almost perfect (>0.8). Next, multiple  
18  
19 183 linear regressions with parameter estimates (beta coefficients) and standard error (SE) were  
20  
21 184 performed to identify an amount change in adolescents' lipid levels by each unit increase of  
22  
23 185 their mothers' lipids. We used survey based statistical regression analyses, and the design  
24  
25 186 effect relating survey sampling was calculated. The regression models included clinical  
26  
27 187 characteristics and health behavioral factors of both adolescents and mothers. In order to find  
28  
29 188 the most adequate model fits among 16 possible combinations between four adolescents' and  
30  
31 189 their mothers' lipid profiles, we calculated adjusted R squared values, which represent the  
32  
33 190 explanatory power of the model. In addition, the beta coefficients were also determined in the  
34  
35 191 subgroups by sex and mother's characteristics (age group, BMI, degree of education,  
36  
37 192 economic activity, and presence or absence of dyslipidemia) using multiple linear regression.  
38  
39 193 Lastly, sensitivity test was done on 4,148 adolescents including 1,264 subjects who had  
40  
41 194 inadequate baseline information or missing mothers' data to identify the baseline  
42  
43 195 characteristics. All 2-sided *P* values <0.05 were considered significant. Statistical analyses  
44  
45 196 were performed using SAS version 9.4 (SAS Institute, Cary, NC, USA).  
46  
47  
48  
49  
50  
51  
52  
53  
54  
55

## 56 198 **Patient and public involvement**

57  
58 199 This study is a population-based survey study. Patients and public were not involved.  
59  
60

200

**RESULTS**

Table 1 shows baseline characteristics and their associations with adolescent lipid levels, and *P* values were calculated considering log transformed outcome values. The mean age of the study population was  $14.7 \pm 1.9$  years (range, 12–18 years), and 52.8% of the adolescents were male. A total of 9.3% of the individuals were overweight. The mean levels (ranges) of adolescents' lipids were  $156.6 \pm 27.0$  (82–350),  $83.6 \pm 46.4$  (15–602),  $50.4 \pm 9.8$  (22–96), and  $89.4 \pm 23.3$  mg/dL (9–296), respectively, for TC, TG, HDL-C, and LDL-C. HDL-C level was decreased in the older age group ( $P=0.021$ ). While TC, HDL-C, and LDL-C levels were significantly higher in female adolescents than in their male counterparts, TG was not different by sex. Individuals with increased BMI showed higher TC, TG, and LDL-C levels, and lower HDL-C levels compared with those within the normal percentile range for BMI. The frequency of eating out was inversely associated with TC level ( $P=0.032$ ), while increased frequency of walking was associated with decreased TC and LDL-C levels ( $P=0.006$  and  $P=0.005$ , respectively). TG level tends to increased in the adolescents whose mothers were obese ( $BMI \geq 25$  kg/m<sup>2</sup>), while the level of HDL-C was inversely associated with the mother's BMI and increasing age. Other health behaviors of the mothers' did not show any significant associations with their adolescents' lipid levels.

218

Adolescent TC level demonstrated a fair positive correlation with mother's TC level ( $r$ , 0.271; 95% confidence interval (CI), 0.236–0.304) (Supplementary Figure S1). TG, HDL-C, and LDL-C levels also had fair positive correlations between adolescents and their mothers, yielding  $r$  (95% CI) = 0.204 (0.169–0.239), 0.289 (0.255–0.322), and 0.286 (0.252–0.319), respectively. For reference, the correlations among the four adolescent lipid profiles

1  
2  
3 224 demonstrated an almost perfect correlation between the TC and LDL-C levels ( $r$ , 0.915; 95%  
4  
5 225 CI, 0.909–0.921;  $P$ <.001), and showed a significant negative correlation between HDL-C and  
6  
7 226 TG ( $r$ , -0.329; 95% CI, -0.361–-0.296;  $P$ <.001). Meanwhile, the partial correlation coefficient  
8  
9 227 (95% CI) for TC, TG, HDL-C, and LDL-C was 0.254 (0.206-0.301), 0.235 (0.186-0.282),  
10  
11 228 0.271 (0.224-0.317), and 0.267 (0.220-0.313) in males ( $n$ =1522), and it was 0.291 (0.241-  
12  
13 229 0.339), 0.168 (0.116-0.220), 0.317 (0.268-0.364), and 0.309 (0.260-0.357) in females  
14  
15 230 ( $n$ =1362). All  $P$  values were less than 0.001.

16  
17 231  
18  
19  
20  
21 232 Based on the adjusted R squared values, the four most adequate regression models were  
22  
23 233 selected (Supplementary Table S1). Table 2 displays the multiple linear regressions of the  
24  
25 234 four adequate models. It appears that  $P$  values are in the log scale. The design effect from  
26  
27 235 survey sampling was 1.01, 1.43, 1.07, and 1.07 in TC, TG, HDL-C, and LDL-C respectively.  
28  
29 236 Adolescent TC increased by 0.23 mg/dL on average as their mothers' TC increased by 1  
30  
31 237 mg/dL (SE, 0.02,  $P$ <.001). The beta coefficients were 0.16 (SE, 0.01), 0.24 (SE, 0.02), and  
32  
33 238 0.24 (SE, 0.02), respectively, in each model of TG, HDL-C, and LDL-C (all  $P$ <.001). TC  
34  
35 239 increased by 13.32 mg/dL in the female adolescents compared with their male counterparts;  
36  
37 240 other lipid parameters were also higher in female adolescents compared with their male  
38  
39 241 counterparts. BMI had a positive association with the levels of TC, TG, and LDL-C, while  
40  
41 242 HDL-C was negatively associated with BMI. The frequency of eating out and walking tended  
42  
43 243 to be inversely associated with TC and LDL-C. Exercise more than 3 days per week was  
44  
45 244 associated with increased TC and LDL-C levels compared with no exercise. With regard to  
46  
47 245 mother's variables, overall adolescents' lipid levels tended to decrease as their mothers' age  
48  
49 246 increased, and other lipids apart from HDL-C tended to decrease when the mother's BMI  
50  
51 247 increased. Increased mothers' alcohol consumption was also significantly associated with  
52  
53 248 decreased adolescents' HDL-C. Mothers' education, working hours, frequency of eating out,  
54  
55  
56  
57  
58  
59  
60

249 and family income did not affect adolescent lipid levels.

250

251 Figure 2 represents the amount change in adolescents' lipid levels with each unit increase of  
252 mothers' lipids in the subgroups. In most subgroups, there were significant positive  
253 relationships between lipids in adolescents and mothers, with the exception of subgroups with  
254 relatively small sample sizes (Table 3). The beta coefficients of TC, HDL-C, and LDL-C  
255 were high in female adolescents compared with their male counterparts, whereas that of TG  
256 was higher in the male adolescents. When the lipid profiles were considered as binary  
257 outcomes, multivariate logistic regressions showed that adolescents' dyslipidemia was  
258 significantly associated with mothers' dyslipidemia (Supplementary Table S2). Finally, the  
259 sensitivity test on 4,148 adolescents showed comparable baseline characteristics with our  
260 study data (Supplementary Table S3).

261

## 262 **DISCUSSIONS**

263 There is significance in that our study analyzed linear relationships of TC, TG, HDL-C, and  
264 LDL-C, respectively, with an amount change of adolescents' lipid levels for each unit  
265 increase of their mothers' lipids. We adjusted for various health behavioral factors of  
266 adolescents and their mothers, as well as using a large national database. Moreover, we found  
267 that relationships between lipids of adolescents and their mothers were significant regardless  
268 of sex and mother characteristics.

269

270 Atherosclerosis is triggered by childhood obesity associated with lipid abnormalities, rather  
271 than obesity itself.<sup>20</sup> The prevalence of dyslipidemia was 6.5% in Korea by the cut-off of  
272 National Cholesterol Education Program (NECP) and American Heart Association (AHA)  
273 guidelines.<sup>21</sup> Meanwhile, the most frequent components among five MetS criteria in



1  
2  
3 274 adolescence were high TG (21.2%) and low HDL-C (13.6%).<sup>22</sup> When cut-off values of a  
4  
5  
6 275 recent guideline were applied to our data,<sup>23</sup> the percentages of abnormal TC ( $\geq 200$  mg/dL),  
7  
8  
9 276 TG ( $\geq 130$  mg/dL), HDL-C ( $<40$  mg/dL), and LDL-C ( $\geq 130$  mg/dL) were 6.6%, 11.9%,  
10  
11  
12 277 13.3%, and 5.0%, respectively. Atherogenic dyslipidemia, characterized by the combination  
13  
14 278 of high TG and small dense LDL-C, and low HDL-C, was a common form of dyslipidemia in  
15  
16 279 young individuals (aged, 2–18 years) and had a strong familial aggregation.<sup>24</sup> Even taking  
17  
18  
19 280 into consideration the argument that a higher cut-off level of TG ( $\geq 150$  mg/dL) is appropriate  
20  
21  
22 281 for Korean adolescents,<sup>25</sup> the rate of high TG observed in the present study was 7.7%. That is,  
23  
24 282 our data showed a more considerable proportion of abnormal TG and HDL-C in adolescents  
25  
26 283 compared to other lipid parameters. Thus, the present study provides further evidence that  
27  
28 284 dyslipidemia especially atherogenic dyslipidemia is a big problem in Korean adolescents,  
29  
30 285 with the concern that it leads to CVD during the remainder of the lifespan.  
31  
32  
33  
34 286  
35  
36 287 It has been reported that dyslipidemia was associated with increased odds of dyslipidemia in  
37  
38 288 first-degree relatives (OR = 2.2).<sup>26</sup> This familial clustering is in turn caused by both genetic  
39  
40 289 backgrounds and shared environmental factors within a family. A previous study found that  
41  
42 290 genes contribute more than environment to familial correlation of lipids and obesity.<sup>15</sup> In this  
43  
44 291 regard, numerous genetic determinants regulating lipid concentrations has been  
45  
46 292 investigated.<sup>27</sup> In addition, an animal study demonstrated that maternal dyslipidemia affected  
47  
48 293 offspring's lipid levels by activation of endogenous cholesterol synthesis.<sup>28</sup> Whatever the  
49  
50 294 cause or, a family history must be a major risk factor for adolescent's dyslipidemia.  
51  
52  
53 295 Meanwhile, even in the subgroup of mothers who had normal TC levels and had never been  
54  
55 296 diagnosed with dyslipidemia, the positive relationships in lipids between the adolescents and  
56  
57  
58  
59  
60

1  
2  
3 297 their mothers were significant for all lipid parameters. These findings may reflect  
4  
5 298 environmental impacts such as healthy diet, exercise habits, and efforts to improve lifestyles  
6  
7 299 within families, rather than just a hereditary influence. Of course, there may also be an impact  
8  
9  
10 300 from other genetic factors such as diabetes or hypertension in first-degree relatives.<sup>26</sup>  
11  
12 301 Interestingly, the beta coefficient was higher in adolescents with non-obese mothers  
13  
14 302 compared to those with obese mothers. It is possible that the genetic background of non-  
15  
16 303 obese dyslipidemic mothers affected the lipid levels of their offspring. However, the mean  
17  
18 304 BMI of dyslipidemic mothers was higher than that of non-dyslipidemic mothers (24.7 kg/m<sup>2</sup>  
19  
20 305 vs. 23.2 kg/m<sup>2</sup>). Moreover, the beta coefficient was also higher in adolescents with non-  
21  
22 306 dyslipidemic mothers than in those with dyslipidemic mothers. Thus, it is more likely that the  
23  
24 307 mothers' perception regarding dyslipidemia influences the adolescents' lipid levels. Of  
25  
26 308 course, this interpretation requires consideration of relationship between lipids and  
27  
28 309 characteristics in mothers. Awareness of dyslipidemia was relatively low despite its higher  
29  
30 310 prevalence worldwide.<sup>29</sup> A mother's perception of lipid levels could affect her children's  
31  
32 311 lipids through efforts related to lifestyle and diet changes.<sup>30</sup> A recent Korean study  
33  
34 312 highlighted education and counseling in order to change health behavior in addition to  
35  
36 313 awareness of dyslipidemia.<sup>31</sup> Our results from subgroup analyses support these previous  
37  
38 314 studies and highlight the influence of the mother's perception of dyslipidemia and resultant  
39  
40 315 lifestyle changes.

316

41  
42  
43  
44  
45  
46  
47  
48  
49 317 There is no doubt that lifestyle modification plays a central role in lipid control. Moreover,  
50  
51 318 considering the high rates of abnormal TG and HDL-C and the restricted indications of lipid-  
52  
53 319 lowering agents in youth, lifestyle changes should play a larger role in adolescent patients.  
54  
55  
56 320 Our results showed that frequent walking was negatively associated with TC and LDL-C  
57  
58 321 levels, which is predictable. Meanwhile, frequent eating out was associated with decreased  
59  
60

1  
2  
3 322 TC and LDL-C, a finding that conflicts with a general notion that eating out induces a high  
4  
5 323 calorie intake or overeating. Eating out was defined as all foods except home-cooked dishes  
6  
7  
8 324 in this survey, then including school meals as well as dining out and delivery foods. Actually,  
9  
10 325 the frequency of eating out showed a great discrepancy between adolescents and mothers in  
11  
12 326 this study. Thus, school foods may compensate for negative effects of eating out by providing  
13  
14 327 regular and well-balanced meals. The positive correlation between exercise and lipid levels,  
15  
16 328 which is also an unexpected result, seems to be influenced by exercise intensity. Exercise  
17  
18 329 frequency alone was not sufficient to explain the effect of exercise adequately; thus, the  
19  
20 330 strength and duration of exercise should be considered. Our data regarding health behavioral  
21  
22 331 factors should be more detailed and concrete. However, it is certain that health behavioral  
23  
24 332 habits influence the lipid levels of adolescents, and therefore adolescents with dyslipidemia  
25  
26 333 and their families should be encouraged to improve their lifestyles.  
27  
28  
29  
30

31 334

32  
33 335 Cholesterol levels in children and adolescents are highly dependent on age and sex.<sup>32</sup> Our  
34  
35 336 data showed that the levels of TC, LDL-C, and HDL-C were higher in female adolescents  
36  
37 337 than in males. In addition, the beta coefficients per unit increase of mother's TC, LDL-C, and  
38  
39 338 HDL-C were also prominent in females. It is possible that mothers with female offspring are  
40  
41 339 either more obese and dyslipidemic or otherwise. However, mother's mean BMI was similar  
42  
43 340 between male and female adolescents ( $23.3 \pm 3.2$  and  $23.5 \pm 3.3$  kg/m<sup>2</sup>, respectively,  $P=0.161$ );  
44  
45 341 furthermore, the rate of mother's dyslipidemia showed no statistical difference between male  
46  
47 342 and female adolescents (10.8% vs. 9.8%, respectively,  $P=0.373$ ). Thus, the difference of beta  
48  
49 343 coefficient by sex may be due to a distinct difference in lipid levels by sex. This is supported  
50  
51 344 by our result that the TG level was higher in male than in female adolescents and the beta  
52  
53 345 coefficient of TG was also higher in male adolescents.  
54  
55  
56  
57  
58  
59  
60

346

1  
2  
3  
4  
5  
6 347 This study has several limitations. First, because it is a survey-based study, our data are  
7  
8 348 vulnerable to recall bias. Second, as it is a cross-sectional design, there was no causal  
9  
10 349 relationship. This factor will be particularly important in consideration of the impacts due to  
11  
12 350 environmental factors. Further well-designed cohort studies are warranted. Third, individuals  
13  
14 351 who responded to the national survey could have greater health concerns. They may have  
15  
16 352 better health behavioral habits, or family members with chronic diseases. However, this  
17  
18 353 survey was uniformly performed in all regions of Korea and targeted all age groups; thus, our  
19  
20 354 data can be considered nationally representative samples. Fourth, the nutritional factors,  
21  
22 355 which were not considered in the analyses because of insufficient information and large  
23  
24 356 missing values, can be significant confounding factors. Further studies based on detailed  
25  
26 357 surveys for health behavioral factors and nutritional elements are needed. Fifth, we did not  
27  
28 358 evaluate the father's lipid levels. If the father's lipid levels had also been considered, the  
29  
30 359 genetic backgrounds of lipids might be emphasized more. Sixth, various comorbidities such  
31  
32 360 as hypothyroidism, Cushing's disease, liver disease, and nephrotic syndrome, among others,  
33  
34 361 as well as long-term use of steroid can affect lipid level,<sup>33</sup> and these could be also  
35  
36 362 confounding factors. However, these chronic diseases are extremely rare during the  
37  
38 363 adolescent period, and thus could be negligible. Finally, the results of our study need to be  
39  
40 364 evaluate with caution as they might be vulnerable to family-wise type I error due to the  
41  
42 365 multiple test involved in our analysis. However, even considering this, the *P* values for the  
43  
44 366 associations are sufficiently significant. Additionally, R-squared indicates just how well the  
45  
46 367 model explains variability of the response data. Although we chose four models, which  
47  
48 368 showed high R-squared, it does not mean accurate representation of goodness of fit for the  
49  
50 369 models.  
51  
52  
53  
54  
55  
56  
57  
58  
59  
60

370

1  
2  
3 371 In conclusion, a mother's lipid levels were positively associated with her adolescents' lipid  
4  
5 372 levels because of both genetic and environmental factors within the family. Adolescent  
6  
7 373 dyslipidemia creates a large risk factor burden for cardiovascular diseases; therefore, timely  
8  
9 374 screening for dyslipidemia is important, especially for indicated adolescents. Our positive  
10  
11 375 correlation between lipids of adolescents and their mothers supports that the mother's lipid  
12  
13 376 level is an appropriate reference for the screening of the adolescent's dyslipidemia.  
14  
15  
16  
17 377

18  
19 378 **Acknowledgements** The authors thank the participants for their cooperation and the staffs of  
20  
21 379 KNHANES (<https://knhanes.cdc.go.kr/knhanes/index.do>) for their hard work.  
22  
23

24 380 **Contributors** E.C.P. and S.I.J. designed the study. J.H.N. and J.S. analyzed and interpreted  
25  
26 381 the data. J.H.N., J.K.L., and Y.J.L. drafted the manuscript. J.H.K. and K.T.H. critically  
27  
28 382 revised the manuscript. All authors read and approved the final version.  
29  
30

31 383 **Funding** This work was not supported by any funding.  
32

33 384 **Competing interests** The authors declare no competing interest.  
34

35 385 **Participant consent** This nationwide survey is fully anonymized and does not require  
36  
37 386 informed consent.  
38  
39

40 387 **Ethics approval** This study was analyzed using KNHANES secondary data. Use of the data  
41  
42 388 was approved by the Institutional Review Board of the KCDC.  
43  
44

45 389 **Availability of data and material** All data analyzed during this study are available in the  
46  
47 390 KCDC and KNHANES repository, [[https://knhanes.cdc.go.kr/knhanes/sub03/sub03\\_01.do](https://knhanes.cdc.go.kr/knhanes/sub03/sub03_01.do)]  
48  
49 391

## 51 392 **REFERENCES**

- 52  
53  
54 393 1. Berenson GS, Srinivasan SR, Bao W, et al. Association between multiple  
55  
56 394 cardiovascular risk factors and atherosclerosis in children and young adults. The  
57  
58 395 Bogalusa Heart Study. N Engl J Med 1998;338:1650-6.  
59  
60

- 1  
2  
3 396 2. Cause-of-death statistics in the Republic of Korea, 2014. *J Korean Med Assoc*  
4  
5 397 2016;59:221-32.  
6  
7  
8 398 3. Urbina EM, Khoury PR, McCoy CE, et al. Triglyceride to HDL-C ratio and increased  
9  
10 399 arterial stiffness in children, adolescents, and young adults. *Pediatrics*  
11  
12 400 2013;131:e1082-90.  
13  
14  
15 401 4. McGill HC, Jr., McMahan CA, Zieske AW, et al. Associations of coronary heart  
16  
17 402 disease risk factors with the intermediate lesion of atherosclerosis in youth. The  
18  
19 403 Pathobiological Determinants of Atherosclerosis in Youth (PDAY) Research Group.  
20  
21 404 *Arterioscler Thromb Vasc Biol* 2000;20:1998-2004.  
22  
23  
24 405 5. Margolis KL, Greenspan LC, Trower NK, et al. Lipid screening in children and  
25  
26 406 adolescents in community practice: 2007 to 2010. *Circ Cardiovasc Qual Outcomes*  
27  
28 407 2014;7:718-26.  
29  
30  
31 408 6. Smetanina N, Albaviciute E, Babinska V, et al. Prevalence of overweight/obesity in  
32  
33 409 relation to dietary habits and lifestyle among 7-17 years old children and adolescents  
34  
35 410 in Lithuania. *BMC Public Health* 2015;15:1001.  
36  
37  
38 411 7. Korea Centers for Disease Control and Prevention. Korea Health Statistics 2014:  
39  
40 412 Korea National Health and Nutrition Examination Survey (KNHANES VI-2);  
41  
42 413 Ministry of Health and Welfare: Seoul, Korea. 2014.  
43  
44  
45 414 8. Ogden CL, Carroll MD, Curtin LR, et al. Prevalence of high body mass index in US  
46  
47 415 children and adolescents, 2007-2008. *JAMA* 2010;303:242-9.  
48  
49  
50 416 9. Ha KH, Kim DJ. Epidemiology of Childhood Obesity in Korea. *Endocrinol Metab*  
51  
52 417 (Seoul) 2016;31:510-8.  
53  
54 418 10. Wang CJ, Li YQ, Wang L, et al. Development and evaluation of a simple and  
55  
56 419 effective prediction approach for identifying those at high risk of dyslipidemia in rural  
57  
58 420 adult residents. *PLoS One* 2012;7:e43834.  
59  
60

- 1  
2  
3 421 11. Danese A, Moffitt TE, Harrington H, et al. Adverse childhood experiences and adult  
4  
5 422 risk factors for age-related disease: depression, inflammation, and clustering of  
6  
7 423 metabolic risk markers. *Arch Pediatr Adolesc Med* 2009;163:1135-43.
- 8  
9  
10 424 12. Buitrago-Lopez A, van den Hooven EH, Rueda-Clausen CF, et al. Socioeconomic  
11  
12 425 status is positively associated with measures of adiposity and insulin resistance, but  
13  
14 426 inversely associated with dyslipidaemia in Colombian children. *J Epidemiol  
15  
16 427 Community Health* 2015;69:580-7.
- 17  
18  
19 428 13. Tarini BA, McInerney JD. Family history in primary care pediatrics. *Pediatrics*  
20  
21 429 2013;132:S203-10.
- 22  
23  
24 430 14. Kathiresan S, Manning AK, Demissie S, et al. A genome-wide association study for  
25  
26 431 blood lipid phenotypes in the Framingham Heart Study. *BMC Med Genet* 2007;8  
27  
28 432 Suppl 1:S17.
- 29  
30  
31 433 15. Hunt SC, Hasstedt SJ, Kuida H, et al. Genetic heritability and common environmental  
32  
33 434 components of resting and stressed blood pressures, lipids, and body mass index in  
34  
35 435 Utah pedigrees and twins. *Am J Epidemiol* 1989;129:625-38.
- 36  
37  
38 436 16. Predazzi IM, Sobota RS, Sanna S, et al. Sex-Specific Parental Effects on Offspring  
39  
40 437 Lipid Levels. *J Am Heart Assoc* 2015;4:e001951.
- 41  
42 438 17. Kweon S, Kim Y, Jang MJ, et al. Data resource profile: the Korea National Health  
43  
44 439 and Nutrition Examination Survey (KNHANES). *Int J Epidemiol* 2014;43:69-77.
- 45  
46  
47 440 18. Park HW, Yoo HY, Kim CH, et al. Reference values of body composition indices: the  
48  
49 441 Korean National Health and Nutrition Examination Surveys. *Yonsei Med J*  
50  
51 442 2015;56:95-102.
- 52  
53  
54 443 19. Jee SH, Sull JW, Park J, et al. Body-mass index and mortality in Korean men and  
55  
56 444 women. *N Engl J Med* 2006;355:779-87.
- 57  
58 445 20. D'Adamo E, Guardamagna O, Chiarelli F, et al. Atherogenic dyslipidemia and  
59  
60

- 1  
2  
3 446 cardiovascular risk factors in obese children. *Int J Endocrinol* 2015;2015:912047.
- 4  
5 447 21. Lim JS. The current state of dyslipidemia in Korean children and adolescents and its  
6  
7 management in clinical practice. *Ann Pediatr Endocrinol Metab* 2013;18:1-8.
- 8 448  
9  
10 449 22. Kim S, So WY. Prevalence of Metabolic Syndrome among Korean Adolescents  
11  
12 According to the National Cholesterol Education Program, Adult Treatment Panel III  
13  
14 and International Diabetes Federation. *Nutrients* 2016;8:558.
- 15 451  
16  
17 452 23. Expert Panel on Integrated Guidelines for Cardiovascular H, Risk Reduction in C,  
18  
19 Adolescents, National Heart L, Blood I. Expert panel on integrated guidelines for  
20  
21 cardiovascular health and risk reduction in children and adolescents: summary report.  
22  
23 *Pediatrics* 2011;128 Suppl 5:S213-56.
- 24 455  
25  
26 456 24. Montali A, Truglio G, Martino F, et al. Atherogenic dyslipidemia in children:  
27  
28 evaluation of clinical, biochemical and genetic aspects. *PLoS One* 2015;10:e0120099.
- 29 457  
30  
31 458 25. Yoon JM. Dyslipidemia in children and adolescents: when and how to diagnose and  
32  
33 treat? *Pediatr Gastroenterol Hepatol Nutr* 2014;17:85-92.
- 34 459  
35  
36 460 26. Khoury M, Manlhiot C, Gibson D, et al. Universal screening for cardiovascular  
37  
38 disease risk factors in adolescents to identify high-risk families: a population-based  
39  
40 cross-sectional study. *BMC Pediatr* 2016;16:11.
- 41 462  
42  
43 463 27. Calandra S, Tarugi P, Speedy HE, et al. Mechanisms and genetic determinants  
44  
45 regulating sterol absorption, circulating LDL levels, and sterol elimination:  
46  
47 implications for classification and disease risk. *J Lipid Res* 2011;52:1885-926.
- 48 465  
49 466 28. Goharkhay N, Tamayo EH, Yin H, et al. Maternal hypercholesterolemia leads to  
50  
51 activation of endogenous cholesterol synthesis in the offspring. *Am J Obstet Gynecol*  
52  
53 2008;199:273 e271-6.
- 54 468  
55  
56 469 29. Zhang FL, Xing YQ, Wu YH, et al. The prevalence, awareness, treatment, and control  
57  
58 of dyslipidemia in northeast China: a population-based cross-sectional survey. *Lipids*  
59  
60



- 1  
2  
3 471 Health Dis 2017;16:61.  
4  
5  
6 472 30. Price JH, Casler SM. African-American mothers' perceptions of cholesterol and its  
7  
8 473 effects on their children. J Natl Med Assoc 1996;88:145-50.  
9  
10 474 31. Cho IY, Park HY, Lee K, et al. Association Between the Awareness of Dyslipidemia  
11  
12 475 and Health Behavior for Control of Lipid Levels Among Korean Adults with  
13  
14 476 Dyslipidemia. Korean J Fam Med 2017;38:64-74.  
15  
16  
17 477 32. Skinner AC, Steiner MJ, Chung AE, et al. Cholesterol curves to identify population  
18  
19 478 norms by age and sex in healthy weight children. Clin Pediatr (Phila) 2012;51:233-7.  
20  
21 479 33. Vodnala D, Rubenfire M, Brook RD. Secondary causes of dyslipidemia. Am J Cardiol  
22  
23 480 2012;110:823-5.  
24  
25  
26 481

## 482 **FIGURE LEGENDS**

483 **Figure 1** Study flow showing sample selection. We selected 2,884 adolescents aged 12–18  
484 whose mothers' data were also available.

485 **Figure 2** Bar graphs showing standardized beta coefficients of adolescent's lipids for each  
486 unit increase of their mother's lipids in subgroups. HDL-C, high-density lipoprotein  
487 cholesterol; LDL-C, low-density lipoprotein cholesterol; TC, total cholesterol; TG,  
488 triglyceride.

**Table 1** Relationship between baseline characteristics and adolescent's lipid profiles

|                             | No. (%)     | TC    |      |                             | TG    |      |                             | HDL-C |      |                             | LDL-C |      |                             |
|-----------------------------|-------------|-------|------|-----------------------------|-------|------|-----------------------------|-------|------|-----------------------------|-------|------|-----------------------------|
|                             |             | Mean  | SD   | <i>P</i> value <sup>†</sup> |
| All (n=2884)                |             | 156.6 | 27.0 |                             | 83.6  | 46.4 |                             | 50.4  | 9.8  |                             | 89.4  | 23.3 |                             |
| <b>Adolescent variables</b> |             |       |      |                             |       |      |                             |       |      |                             |       |      |                             |
| Age (years)                 |             |       |      | 0.359                       |       |      | 0.825                       |       |      | 0.021                       |       |      | 0.932                       |
| 12-14                       | 1454 (50.4) | 156.9 | 26.4 |                             | 84.0  | 47.0 |                             | 50.8  | 9.8  |                             | 89.2  | 22.8 |                             |
| 15-18                       | 1430 (49.6) | 156.2 | 27.6 |                             | 83.1  | 45.8 |                             | 50.0  | 9.8  |                             | 89.6  | 23.8 |                             |
| Sex                         |             |       |      | <.001                       |       |      | 0.729                       |       |      | <.001                       |       |      | <.001                       |
| Male                        | 1522 (52.8) | 151.4 | 27.1 |                             | 84.6  | 49.7 |                             | 48.7  | 9.6  |                             | 85.9  | 23.5 |                             |
| Female                      | 1362 (47.2) | 162.3 | 25.9 |                             | 82.4  | 42.3 |                             | 52.4  | 9.7  |                             | 93.4  | 22.5 |                             |
| BMI*                        |             |       |      | 0.016                       |       |      | <.001                       |       |      | <.001                       |       |      | <.001                       |
| <85%                        | 2617 (90.7) | 156.1 | 26.6 |                             | 81.0  | 44.6 |                             | 51.1  | 9.7  |                             | 88.9  | 22.9 |                             |
| ≥85%                        | 267 (9.3)   | 160.7 | 30.7 |                             | 109.1 | 55.5 |                             | 44.2  | 8.0  |                             | 94.6  | 26.3 |                             |
| Glucose (mg/dl)             |             |       |      | 0.047                       |       |      | 0.536                       |       |      | 0.987                       |       |      | 0.438                       |
| ≤100                        | 2752 (95.4) | 156.4 | 26.8 |                             | 83.4  | 46.2 |                             | 50.4  | 9.8  |                             | 89.3  | 23.1 |                             |
| >100                        | 132 (4.6)   | 159.6 | 32.1 |                             | 86.8  | 49.9 |                             | 50.5  | 10.0 |                             | 91.7  | 27.7 |                             |
| Stress level                |             |       |      | 0.439                       |       |      | 0.955                       |       |      | 0.545                       |       |      | 0.335                       |
| Non                         | 476 (16.5)  | 156.9 | 28.3 |                             | 82.8  | 43.9 |                             | 50.1  | 9.6  |                             | 90.2  | 24.6 |                             |
| Mild                        | 1714 (59.4) | 156.9 | 26.8 |                             | 83.7  | 45.7 |                             | 50.6  | 9.9  |                             | 89.6  | 23.3 |                             |
| Moderate                    | 694 (24.1)  | 155.5 | 26.8 |                             | 83.8  | 49.7 |                             | 50.3  | 9.7  |                             | 88.4  | 22.5 |                             |
| Eating out/week             |             |       |      | 0.032                       |       |      | 0.368                       |       |      | 0.471                       |       |      | 0.118                       |
| ≥7                          | 1121 (38.9) | 154.8 | 26.3 |                             | 81.0  | 40.4 |                             | 50.1  | 9.7  |                             | 88.4  | 22.9 |                             |
| 5-6                         | 1676 (58.1) | 157.5 | 27.4 |                             | 85.1  | 50.0 |                             | 50.6  | 9.8  |                             | 89.9  | 23.6 |                             |
| 1-4                         | 66 (2.3)    | 159.3 | 25.6 |                             | 85.6  | 44.9 |                             | 50.4  | 10.5 |                             | 91.6  | 21.0 |                             |
| <1                          | 21 (0.7)    | 164.6 | 33.3 |                             | 90.4  | 48.2 |                             | 48.4  | 9.5  |                             | 98.0  | 27.2 |                             |
| Walking/week                |             |       |      | 0.006                       |       |      | 0.955                       |       |      | 0.542                       |       |      | 0.005                       |
| 0-1 day                     | 321 (11.1)  | 159.1 | 26.4 |                             | 84.9  | 56.3 |                             | 50.8  | 10.1 |                             | 91.4  | 22.1 |                             |
| 2-4 days                    | 502 (17.4)  | 157.9 | 27.0 |                             | 84.4  | 44.6 |                             | 50.1  | 9.5  |                             | 90.8  | 23.7 |                             |
| 5-6 days                    | 760 (26.4)  | 157.9 | 28.6 |                             | 83.8  | 47.6 |                             | 50.8  | 9.9  |                             | 90.4  | 24.3 |                             |
| 7 days                      | 1301 (45.1) | 154.6 | 26.2 |                             | 82.8  | 43.6 |                             | 50.2  | 9.8  |                             | 87.8  | 22.7 |                             |
| Exercise/week               |             |       |      | 0.108                       |       |      | 0.193                       |       |      | 0.021                       |       |      | 0.382                       |
| Non                         | 1846 (64.0) | 157.3 | 26.8 |                             | 84.4  | 47.0 |                             | 50.8  | 10.0 |                             | 89.5  | 22.8 |                             |
| 1-2days                     | 633 (22.0)  | 155.7 | 27.5 |                             | 81.9  | 45.5 |                             | 49.5  | 9.1  |                             | 89.7  | 24.0 |                             |
| ≥3days                      | 405 (14.0)  | 154.7 | 27.4 |                             | 82.2  | 45.0 |                             | 50.1  | 9.8  |                             | 88.2  | 24.5 |                             |
| <b>Mother variables</b>     |             |       |      |                             |       |      |                             |       |      |                             |       |      |                             |
| Age (years)                 |             |       |      | 0.091                       |       |      | 0.502                       |       |      | 0.023                       |       |      | 0.566                       |
| 30-39                       | 505 (17.5)  | 157.7 | 25.8 |                             | 85.5  | 46.7 |                             | 51.2  | 9.7  |                             | 89.3  | 21.9 |                             |
| 40-49                       | 2154 (74.7) | 156.7 | 27.4 |                             | 83.3  | 46.7 |                             | 50.4  | 9.9  |                             | 89.6  | 23.7 |                             |
| 50-59                       | 225 (7.8)   | 153.1 | 26.1 |                             | 82.0  | 43.0 |                             | 49.0  | 8.7  |                             | 87.6  | 22.1 |                             |
| BMI (kg/m <sup>2</sup> )    |             |       |      | 0.486                       |       |      | 0.063                       |       |      | <.001                       |       |      | 0.475                       |

|    |                 |             |       |      |       |      |      |       |      |      |       |      |       |
|----|-----------------|-------------|-------|------|-------|------|------|-------|------|------|-------|------|-------|
| 1  |                 |             |       |      |       |      |      |       |      |      |       |      |       |
| 2  |                 |             |       |      |       |      |      |       |      |      |       |      |       |
| 3  | <23             | 1430 (49.6) | 156.6 | 26.4 |       | 82.2 | 42.9 |       | 51.1 | 9.7  |       | 89.0 | 22.3  |
| 4  | 23-24.9         | 684 (23.7)  | 155.6 | 26.7 |       | 81.9 | 44.6 |       | 50.1 | 9.7  |       | 89.1 | 23.2  |
| 5  | ≥25             | 770 (26.7)  | 157.4 | 28.5 |       | 87.6 | 53.4 |       | 49.5 | 10.0 |       | 90.5 | 25.1  |
| 6  | Smoking status  |             |       |      | 0.409 |      |      | 0.175 |      |      | 0.138 |      | 0.124 |
| 7  | Non             | 2648 (91.8) | 156.4 | 27.1 |       | 83.4 | 46.8 |       | 50.5 | 9.8  |       | 89.2 | 23.3  |
| 8  | Ex-Current      | 89 (3.1)    | 159.2 | 26.1 |       | 82.1 | 41.1 |       | 49.8 | 9.5  |       | 92.8 | 22.7  |
| 9  | Drinking status |             |       |      | 0.392 |      |      | 0.569 |      |      | 0.383 |      | 0.154 |
| 10 | Non             | 718 (24.9)  | 155.4 | 27.0 |       | 82.7 | 47.5 |       | 50.8 | 9.8  |       | 88.0 | 23.1  |
| 11 | ≤1/month        | 1250 (43.3) | 157.0 | 27.2 |       | 83.2 | 46.3 |       | 50.2 | 9.7  |       | 90.2 | 23.6  |
| 12 | ≥2/month        | 916 (31.8)  | 156.8 | 26.9 |       | 84.8 | 45.6 |       | 50.4 | 9.9  |       | 89.4 | 23.0  |
| 13 | Education level |             |       |      | 0.848 |      |      | 0.168 |      |      | 0.455 |      | 0.918 |
| 14 | Elementary      | 96 (3.3)    | 155.5 | 27.5 |       | 84.9 | 47.5 |       | 49.8 | 9.8  |       | 88.7 | 24.9  |
| 15 | Middle          | 177 (6.1)   | 157.1 | 28.5 |       | 84.5 | 46.0 |       | 49.9 | 8.8  |       | 90.3 | 24.6  |
| 16 | High            | 1624 (56.3) | 157.0 | 27.6 |       | 85.2 | 48.6 |       | 50.3 | 9.9  |       | 89.6 | 23.9  |
| 17 | University      | 987 (34.2)  | 155.9 | 25.8 |       | 80.6 | 42.3 |       | 50.8 | 9.7  |       | 89.0 | 21.8  |
| 18 | Income (1,000\) |             |       |      | 0.333 |      |      | 0.495 |      |      | 0.323 |      | 0.445 |
| 19 | <1,000          | 219 (7.6)   | 157.9 | 28.6 |       | 87.9 | 49.3 |       | 50.0 | 9.5  |       | 90.2 | 24.6  |
| 20 | 1,000-1,999     | 696 (24.1)  | 154.7 | 24.7 |       | 84.2 | 50.9 |       | 49.9 | 9.5  |       | 88.0 | 21.3  |
| 21 | 2,000-2,999     | 976 (33.8)  | 156.9 | 27.2 |       | 83.3 | 45.3 |       | 50.8 | 9.8  |       | 89.5 | 23.7  |
| 22 | ≥3,000          | 993 (34.4)  | 157.3 | 28.1 |       | 82.4 | 43.4 |       | 50.6 | 10.1 |       | 90.2 | 23.9  |
| 23 | Working hours   |             |       |      | 0.936 |      |      | 0.873 |      |      | 0.643 |      | 0.703 |
| 24 | Non             | 1679 (58.2) | 156.5 | 26.4 |       | 83.2 | 46.4 |       | 50.3 | 9.8  |       | 89.6 | 22.7  |
| 25 | Full-time       | 906 (31.4)  | 156.7 | 27.9 |       | 84.0 | 47.4 |       | 50.6 | 9.5  |       | 89.2 | 24.4  |
| 26 | Part time       | 299 (10.4)  | 156.3 | 27.9 |       | 84.3 | 42.9 |       | 50.3 | 10.5 |       | 89.0 | 23.2  |
| 27 | Eating out/week |             |       |      | 0.443 |      |      | 0.630 |      |      | 0.369 |      | 0.355 |
| 28 | ≥7              | 370 (12.8)  | 155.5 | 27.9 |       | 80.2 | 40.0 |       | 51.1 | 9.7  |       | 88.3 | 25.8  |
| 29 | 5-6             | 615 (21.3)  | 157.1 | 28.5 |       | 83.5 | 43.4 |       | 50.0 | 9.7  |       | 90.4 | 24.1  |
| 30 | 1-4             | 1278 (44.3) | 156.0 | 26.5 |       | 83.5 | 46.8 |       | 50.4 | 10.0 |       | 88.9 | 22.5  |
| 31 | <1              | 621 (21.5)  | 157.7 | 26.1 |       | 85.7 | 51.6 |       | 50.5 | 9.5  |       | 90.1 | 22.6  |

\*Based on body mass index (kg/m<sup>2</sup>) for age percentiles in male and female.

†P values were calculated considering log transformed outcome values.

BMI, body mass index; HDL-C, high-density lipoprotein cholesterol; LDL-C, low-density lipoprotein cholesterol; SD, standard deviation; TC, total cholesterol; TG, triglyceride.

**Table 2** Multivariate analyses of four regression models for adolescent and mother’s lipid profiles

|                                            | TC & TC |        |       |                             | TG & TG |        |       |                             | HDL-C & HDL-C |        |       |                             | LDL-C & LDL-C |        |       |                             |
|--------------------------------------------|---------|--------|-------|-----------------------------|---------|--------|-------|-----------------------------|---------------|--------|-------|-----------------------------|---------------|--------|-------|-----------------------------|
|                                            | $\beta$ | S.B.   | S.E.  | <i>P</i> value <sup>†</sup> | $\beta$ | S.B.   | S.E.  | <i>P</i> value <sup>†</sup> | $\beta$       | S.B.   | S.E.  | <i>P</i> value <sup>†</sup> | $\beta$       | S.B.   | S.E.  | <i>P</i> value <sup>†</sup> |
| <b>Mother lipids</b><br>(beta coefficient) | 0.229   | 0.268  | 0.015 | <.001                       | 0.161   | 0.215  | 0.020 | <.001                       | 0.240         | 0.294  | 0.016 | <.001                       | 0.236         | 0.284  | 0.016 | <.001                       |
| <b>Adolescent variables</b>                |         |        |       |                             |         |        |       |                             |               |        |       |                             |               |        |       |                             |
| Age (years)                                |         |        |       |                             |         |        |       |                             |               |        |       |                             |               |        |       |                             |
| 12-14                                      | Ref     |        |       |                             | Ref     |        |       |                             | Ref           |        |       |                             | Ref           |        |       |                             |
| 15-18                                      | -0.168  | -0.003 | 1.071 | 0.671                       | -0.788  | -0.009 | 1.970 | 0.515                       | -0.476        | -0.024 | 0.388 | 0.213                       | 0.539         | 0.012  | 0.920 | 0.865                       |
| Sex                                        |         |        |       |                             |         |        |       |                             |               |        |       |                             |               |        |       |                             |
| Male                                       | Ref     |        |       |                             | Ref     |        |       |                             | Ref           |        |       |                             | Ref           |        |       |                             |
| Female                                     | 13.317  | 0.246  | 1.035 | <.001                       | 1.767   | 0.019  | 1.845 | 0.004                       | 2.936         | 0.150  | 0.378 | <.001                       | 9.954         | 0.213  | 0.892 | <.001                       |
| BMI (%)*                                   |         |        |       |                             |         |        |       |                             |               |        |       |                             |               |        |       |                             |
| <85                                        | Ref     |        |       |                             | Ref     |        |       |                             | Ref           |        |       |                             | Ref           |        |       |                             |
| ≥85                                        | 10.931  | 0.117  | 1.950 | <.001                       | 29.963  | 0.187  | 3.575 | <.001                       | -5.514        | -0.163 | 0.563 | <.001                       | 10.299        | 0.128  | 1.642 | <.001                       |
| Glucose (mg/dl)                            |         |        |       |                             |         |        |       |                             |               |        |       |                             |               |        |       |                             |
| ≤100                                       | Ref     |        |       |                             | Ref     |        |       |                             | Ref           |        |       |                             | Ref           |        |       |                             |
| >100                                       | 4.240   | 0.033  | 2.743 | 0.157                       | 3.483   | 0.016  | 4.322 | 0.404                       | 0.448         | 0.010  | 0.817 | 0.734                       | 2.768         | 0.025  | 2.334 | 0.343                       |
| Stress level                               |         |        |       |                             |         |        |       |                             |               |        |       |                             |               |        |       |                             |
| Non                                        | Ref     |        |       |                             | Ref     |        |       |                             | Ref           |        |       |                             | Ref           |        |       |                             |
| Mild                                       | -0.117  | -0.002 | 1.370 | 0.943                       | 1.583   | 0.017  | 2.229 | 0.531                       | 0.521         | 0.026  | 0.459 | 0.348                       | -0.979        | -0.021 | 1.206 | 0.423                       |
| Moderate                                   | -2.199  | -0.035 | 1.561 | 0.162                       | 1.739   | 0.016  | 2.731 | 0.730                       | 0.103         | 0.005  | 0.533 | 0.893                       | -2.552        | -0.047 | 1.349 | 0.053                       |
| Eating out/week                            |         |        |       |                             |         |        |       |                             |               |        |       |                             |               |        |       |                             |
| ≥7                                         | Ref     |        |       |                             | Ref     |        |       |                             | Ref           |        |       |                             | Ref           |        |       |                             |
| 5-6                                        | 2.599   | 0.047  | 1.025 | 0.017                       | 2.939   | 0.031  | 1.763 | 0.329                       | 0.107         | 0.005  | 0.374 | 0.782                       | 2.030         | 0.043  | 0.896 | 0.039                       |
| 1-4                                        | 2.142   | 0.012  | 3.110 | 0.480                       | 3.127   | 0.010  | 5.402 | 0.687                       | 0.036         | 0.001  | 1.225 | 0.975                       | 1.397         | 0.009  | 2.666 | 0.574                       |
| <1                                         | 8.908   | 0.028  | 6.882 | 0.255                       | 6.660   | 0.012  | 9.111 | 0.360                       | -0.848        | -0.007 | 1.800 | 0.673                       | 8.283         | 0.030  | 5.553 | 0.152                       |
| Walking/week                               |         |        |       |                             |         |        |       |                             |               |        |       |                             |               |        |       |                             |
| 0-1 day                                    | Ref     |        |       |                             | Ref     |        |       |                             | Ref           |        |       |                             | Ref           |        |       |                             |
| 2-4 days                                   | -1.422  | -0.020 | 1.799 | 0.410                       | -0.919  | -0.008 | 3.566 | 0.820                       | -0.371        | -0.014 | 0.658 | 0.774                       | -0.864        | -0.014 | 1.547 | 0.464                       |
| 5-6 days                                   | -1.349  | -0.022 | 1.693 | 0.292                       | -1.070  | -0.010 | 3.453 | 0.817                       | -0.092        | -0.004 | 0.626 | 0.966                       | -1.119        | -0.021 | 1.430 | 0.208                       |
| 7 days                                     | -3.466  | -0.064 | 1.554 | 0.024                       | -2.035  | -0.022 | 2.291 | 0.921                       | -0.021        | -0.001 | 0.594 | 0.932                       | -3.143        | -0.067 | 1.316 | 0.007                       |
| Exercise/week                              |         |        |       |                             |         |        |       |                             |               |        |       |                             |               |        |       |                             |
| Non                                        | Ref     |        |       |                             | Ref     |        |       |                             | Ref           |        |       |                             | Ref           |        |       |                             |
| 1-2days                                    | 1.528   | 0.023  | 1.210 | 0.208                       | -2.743  | -0.024 | 2.074 | 0.132                       | -0.374        | -0.016 | 0.416 | 0.501                       | 2.361         | 0.042  | 1.034 | 0.013                       |
| ≥3days                                     | 2.992   | 0.038  | 1.476 | 0.032                       | -3.400  | -0.025 | 2.544 | 0.194                       | 0.939         | 0.033  | 0.527 | 0.061                       | 3.018         | 0.045  | 1.305 | 0.027                       |
| <b>Mother variables</b>                    |         |        |       |                             |         |        |       |                             |               |        |       |                             |               |        |       |                             |
| Age (years)                                |         |        |       |                             |         |        |       |                             |               |        |       |                             |               |        |       |                             |
| 30-39                                      | Ref     |        |       |                             | Ref     |        |       |                             | Ref           |        |       |                             | Ref           |        |       |                             |

|    |                          |        |        |       |       |        |        |       |       |        |        |       |       |        |        |       |       |
|----|--------------------------|--------|--------|-------|-------|--------|--------|-------|-------|--------|--------|-------|-------|--------|--------|-------|-------|
| 1  |                          |        |        |       |       |        |        |       |       |        |        |       |       |        |        |       |       |
| 2  |                          |        |        |       |       |        |        |       |       |        |        |       |       |        |        |       |       |
| 3  | 40-49                    | -1.270 | -0.020 | 1.302 | 0.272 | -1.716 | -0.016 | 2.364 | 0.364 | -0.972 | -0.043 | 0.478 | 0.031 | 0.046  | 0.001  | 1.106 | 0.926 |
| 4  | 50-59                    | -6.554 | -0.065 | 2.165 | 0.003 | -6.270 | -0.036 | 3.780 | 0.149 | -2.071 | -0.057 | 0.725 | 0.009 | -3.230 | -0.037 | 1.868 | 0.126 |
| 5  | BMI (kg/m <sup>2</sup> ) |        |        |       |       |        |        |       |       |        |        |       |       |        |        |       |       |
| 6  | <23                      | Ref    |        |       |       |
| 7  | 23-24.9                  | -1.637 | -0.026 | 1.159 | 0.141 | -3.390 | -0.031 | 2.034 | 0.015 | 0.175  | 0.008  | 0.425 | 0.749 | -0.849 | -0.016 | 0.994 | 0.295 |
| 8  | ≥25                      | -2.467 | -0.040 | 1.221 | 0.024 | -4.209 | -0.040 | 2.297 | 0.002 | 0.612  | 0.028  | 0.448 | 0.261 | -1.513 | -0.029 | 1.073 | 0.090 |
| 9  | Smoking status           |        |        |       |       |        |        |       |       |        |        |       |       |        |        |       |       |
| 10 | Non                      | Ref    |        |       |       |
| 11 | Ex-Current               | 1.855  | 0.015  | 2.321 | 0.372 | -2.802 | -0.013 | 3.551 | 0.996 | -1.544 | -0.035 | 0.825 | 0.080 | 4.246  | 0.040  | 1.944 | 0.012 |
| 12 | Drinking status          |        |        |       |       |        |        |       |       |        |        |       |       |        |        |       |       |
| 13 | Non                      | Ref    |        |       |       |
| 14 | ≤1/month                 | 0.056  | 0.001  | 1.306 | 0.934 | 2.098  | 0.021  | 2.282 | 0.438 | -1.724 | -0.082 | 0.469 | <.001 | 1.168  | 0.023  | 1.112 | 0.231 |
| 15 | ≥2/month                 | -0.014 | 0.000  | 1.205 | 0.996 | 0.417  | 0.004  | 2.146 | 0.939 | -0.928 | -0.047 | 0.427 | 0.035 | 0.757  | 0.016  | 1.037 | 0.564 |
| 16 | Education level          |        |        |       |       |        |        |       |       |        |        |       |       |        |        |       |       |
| 17 | Elementary               | Ref    |        |       |       |
| 18 | Middle                   | 1.689  | 0.015  | 3.314 | 0.652 | 1.770  | 0.009  | 5.778 | 0.588 | -0.154 | -0.004 | 1.245 | 0.925 | 1.228  | 0.013  | 2.898 | 0.760 |
| 19 | High                     | -0.329 | -0.006 | 2.822 | 0.936 | 1.296  | 0.014  | 5.062 | 0.629 | -0.414 | -0.021 | 1.106 | 0.778 | -0.355 | -0.008 | 2.505 | 0.884 |
| 20 | University               | -1.680 | -0.029 | 2.911 | 0.638 | -1.693 | -0.017 | 5.212 | 0.860 | -0.299 | -0.015 | 1.037 | 0.895 | -1.301 | -0.026 | 2.565 | 0.668 |
| 21 | Income (1,000\)          |        |        |       |       |        |        |       |       |        |        |       |       |        |        |       |       |
| 22 | <1,000                   | Ref    |        |       |       |
| 23 | 1,000-1,999              | -1.700 | -0.027 | 2.010 | 0.521 | -1.408 | -0.013 | 3.858 | 0.592 | -0.460 | -0.020 | 0.727 | 0.561 | -0.964 | -0.018 | 1.710 | 0.731 |
| 24 | 2,000-2,999              | 0.419  | 0.007  | 1.976 | 0.748 | -1.328 | -0.014 | 3.682 | 0.775 | 0.105  | 0.005  | 0.715 | 0.934 | 0.485  | 0.010  | 1.685 | 0.707 |
| 25 | ≥3,000                   | 0.821  | 0.014  | 2.030 | 0.658 | -1.818 | -0.019 | 3.697 | 0.793 | 0.076  | 0.004  | 0.729 | 0.996 | 0.994  | 0.020  | 1.726 | 0.545 |
| 26 | Working hours            |        |        |       |       |        |        |       |       |        |        |       |       |        |        |       |       |
| 27 | Non                      | Ref    |        |       |       |
| 28 | Full-time                | 0.834  | 0.014  | 1.159 | 0.484 | 3.312  | 0.033  | 2.202 | 0.162 | 0.206  | 0.010  | 0.421 | 0.572 | -0.150 | -0.003 | 0.999 | 0.702 |
| 29 | Part time                | 0.279  | 0.003  | 1.592 | 0.986 | 0.496  | 0.003  | 2.649 | 0.658 | 0.008  | 0.000  | 0.598 | 0.797 | 0.068  | 0.001  | 1.330 | 0.989 |
| 30 | Eating out/week          |        |        |       |       |        |        |       |       |        |        |       |       |        |        |       |       |
| 31 | ≥7                       | Ref    |        |       |       |
| 32 | 5-6                      | 1.637  | 0.025  | 1.754 | 0.381 | 3.492  | 0.031  | 2.735 | 0.309 | -0.868 | -0.036 | 0.605 | 0.122 | 1.868  | 0.033  | 1.583 | 0.157 |
| 33 | 1-4                      | 0.539  | 0.010  | 1.615 | 0.686 | 3.111  | 0.033  | 2.646 | 0.555 | -0.372 | -0.019 | 0.572 | 0.472 | 0.374  | 0.008  | 1.463 | 0.588 |
| 34 | <1                       | 1.652  | 0.025  | 1.763 | 0.263 | 4.206  | 0.037  | 3.188 | 0.534 | -0.119 | -0.005 | 0.630 | 0.889 | 1.088  | 0.019  | 1.600 | 0.331 |

\*Based on body mass index (kg/m<sup>2</sup>) for age percentiles in male and female.

†P values were calculated considering log transformed outcome values.

BMI, body mass index; HDL-C, high-density lipoprotein cholesterol; LDL-C, low-density lipoprotein cholesterol; SD, standard deviation; S.B., standardized beta; S.E., standard error; TC, total cholesterol; TG, triglyceride.

**Table 3** Subgroup analyses based on sex and mother characteristics

|                         |                          | TC & TC     |       |       |                | TG & TG   |       |       |                | HDL-C & HDL-C |       |       |                | LDL-C & LDL-C |       |       |                |       |
|-------------------------|--------------------------|-------------|-------|-------|----------------|-----------|-------|-------|----------------|---------------|-------|-------|----------------|---------------|-------|-------|----------------|-------|
|                         |                          | $\beta^*$   | S.B.  | S.E.  | <i>P</i> value | $\beta^*$ | S.B.  | S.E.  | <i>P</i> value | $\beta^*$     | S.B.  | S.E.  | <i>P</i> value | $\beta^*$     | S.B.  | S.E.  | <i>P</i> value |       |
| Sex                     |                          |             |       |       |                |           |       |       |                |               |       |       |                |               |       |       |                |       |
|                         | Male                     | 1522 (52.8) | 0.221 | 0.258 | 0.021          | <.001     | 0.199 | 0.245 | 0.021          | <.001         | 0.215 | 0.273 | 0.020          | <.001         | 0.228 | 0.274 | 0.021          | <.001 |
|                         | Female                   | 1362 (47.2) | 0.244 | 0.299 | 1.510          | <.001     | 0.122 | 0.181 | 0.020          | <.001         | 0.271 | 0.331 | 0.022          | <.001         | 0.250 | 0.312 | 0.021          | <.001 |
| <b>Mother variables</b> |                          |             |       |       |                |           |       |       |                |               |       |       |                |               |       |       |                |       |
|                         | Age (years)              |             |       |       |                |           |       |       |                |               |       |       |                |               |       |       |                |       |
|                         | 30-39                    | 505 (17.5)  | 0.228 | 0.274 | 0.036          | <.001     | 0.150 | 0.186 | 0.040          | <.001         | 0.224 | 0.278 | 0.038          | <.001         | 0.247 | 0.315 | 0.035          | <.001 |
|                         | 40-49                    | 2154 (74.7) | 0.239 | 0.273 | 0.018          | <.001     | 0.164 | 0.210 | 0.017          | <.001         | 0.250 | 0.302 | 0.018          | <.001         | 0.250 | 0.292 | 0.018          | <.001 |
|                         | 50-59                    | 225 (7.8)   | 0.099 | 0.127 | 0.053          | 0.062     | 0.157 | 0.291 | 0.039          | <.001         | 0.207 | 0.287 | 0.051          | <.001         | 0.058 | 0.081 | 0.048          | 0.230 |
|                         | BMI (kg/m <sup>2</sup> ) |             |       |       |                |           |       |       |                |               |       |       |                |               |       |       |                |       |
|                         | <25                      | 2114 (73.3) | 0.249 | 0.288 | 0.018          | <.001     | 0.185 | 0.221 | 0.018          | <.001         | 0.250 | 0.313 | 0.017          | <.001         | 0.265 | 0.315 | 0.017          | <.001 |
|                         | ≥25                      | 770 (26.7)  | 0.172 | 0.202 | 0.030          | <.001     | 0.129 | 0.183 | 0.025          | <.001         | 0.180 | 0.189 | 0.034          | <.001         | 0.168 | 0.203 | 0.030          | <.001 |
|                         | Education level          |             |       |       |                |           |       |       |                |               |       |       |                |               |       |       |                |       |
|                         | Elementary               | 96 (3.3)    | 0.154 | 0.185 | 0.111          | 0.171     | 0.212 | 0.287 | 0.105          | 0.047         | 0.056 | 0.064 | 0.110          | 0.616         | 0.136 | 0.185 | 0.098          | 0.171 |
|                         | Middle                   | 177 (6.1)   | 0.222 | 0.240 | 0.073          | 0.003     | 0.241 | 0.055 | 0.379          | <.001         | 0.133 | 0.187 | 0.060          | 0.028         | 0.279 | 0.316 | 0.065          | <.001 |
|                         | High                     | 1624 (56.3) | 0.226 | 0.264 | 0.021          | <.001     | 0.141 | 0.190 | 0.019          | <.001         | 0.257 | 0.314 | 0.020          | <.001         | 0.226 | 0.268 | 0.021          | <.001 |
|                         | University               | 987 (34.2)  | 0.233 | 0.278 | 0.026          | <.001     | 0.174 | 0.209 | 0.028          | <.001         | 0.247 | 0.296 | 0.027          | <.001         | 0.253 | 0.314 | 0.025          | <.001 |
|                         | Dyslipidemia†            |             |       |       |                |           |       |       |                |               |       |       |                |               |       |       |                |       |
|                         | No                       | 2587 (89.7) | 0.259 | 0.257 | 0.019          | <.001     | 0.190 | 0.232 | 0.017          | <.001         | 0.255 | 0.305 | 0.016          | <.001         | 0.263 | 0.273 | 0.018          | <.001 |
|                         | Yes                      | 297 (10.3)  | 0.121 | 0.182 | 0.040          | 0.003     | 0.096 | 0.189 | 0.032          | 0.003         | 0.151 | 0.222 | 0.045          | 0.001         | 0.137 | 0.224 | 0.035          | <.001 |
|                         | Economic activity        |             |       |       |                |           |       |       |                |               |       |       |                |               |       |       |                |       |
|                         | No                       | 1679 (58.2) | 0.202 | 0.240 | 0.020          | <.001     | 0.186 | 0.251 | 0.019          | <.001         | 0.258 | 0.325 | 0.019          | <.001         | 0.205 | 0.250 | 0.019          | <.001 |
|                         | Yes                      | 1205 (41.8) | 0.267 | 0.308 | 0.024          | <.001     | 0.121 | 0.159 | 0.024          | <.001         | 0.214 | 0.251 | 0.025          | <.001         | 0.280 | 0.332 | 0.023          | <.001 |

The other covariates were adjusted for these regressions.

\*An amount change in adolescents' lipid levels by each unit increase of their mothers' lipids.

†Included cases diagnosed and/or treated with dyslipidemia, and cases with cholesterol level above 240mg/dl.

BMI, body mass index; HDL-C, high-density lipoprotein cholesterol; LDL-C, low-density lipoprotein cholesterol; SD, standard deviation; S.B., standardized beta; S.E., standard error; TC, total cholesterol; TG, triglyceride.



34 Figure 1 Study flow showing sample selection. We selected 2,884 adolescents aged 12–18 whose mothers'  
35 data were also available.

36  
37 104x90mm (300 x 300 DPI)



Figure 2 Bar graphs showing standardized beta coefficients of adolescent's lipids for each unit increase of their mother's lipids in subgroups. HDL-C, high-density lipoprotein cholesterol; LDL-C, low-density lipoprotein cholesterol; TC, total cholesterol; TG, triglyceride.

124x90mm (300 x 300 DPI)



TC

*P*<.0001

TG

*P*<.0001



HDL-C

*P*<.0001

LDL-C

*P*<.0001

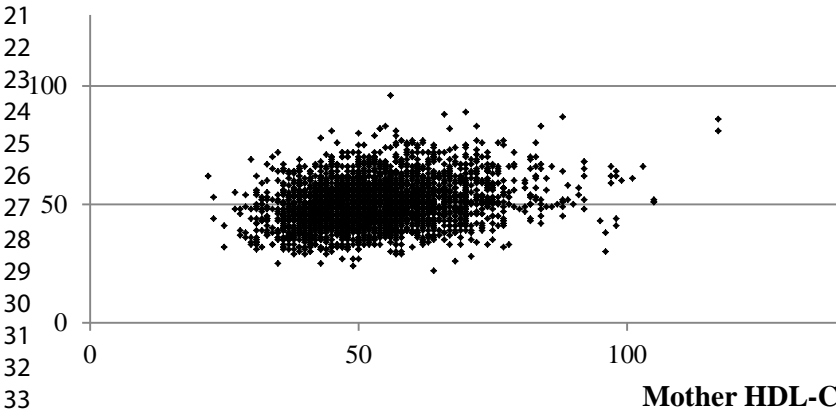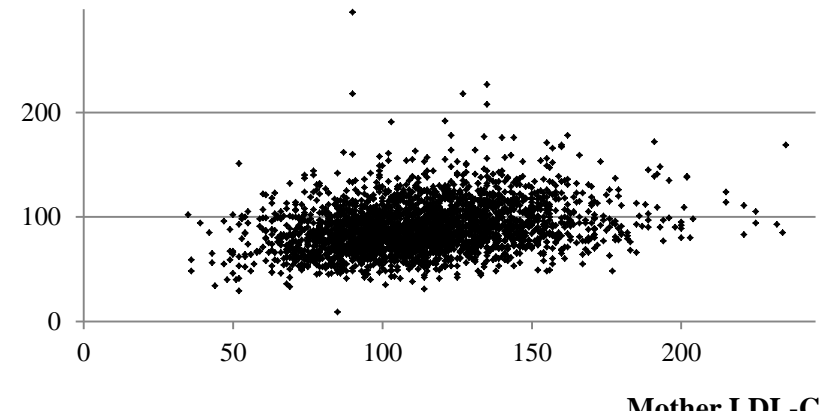

**Supplementary Figure S1** Dot plots of correlations between adolescent's and mother's lipids.

HDL-C, high-density lipoprotein cholesterol; LDL-C, low-density lipoprotein cholesterol; TC, total cholesterol; TG, triglyceride.

1  
2  
3  
4  
5  
6  
7  
8  
9  
10  
11  
12  
13  
14  
15  
16  
17  
18  
19  
20  
21  
22  
23  
24  
25  
26  
27  
28  
29  
30  
31  
32  
33  
34  
35  
36  
37  
38  
39  
40  
41  
42  
43  
44  
45  
46  
47

**Supplementary Table S1** Adjusted R squares for regression models of lipid profiles between adolescent and mother

| Adjusted R <sup>2</sup> |       | Adolescents   |               |               |               |
|-------------------------|-------|---------------|---------------|---------------|---------------|
|                         |       | TC            | TG            | HDL-C         | LDL-C         |
| Mothers                 | TC    | <b>0.1245</b> | 0.0296        | 0.0723        | 0.1095        |
|                         | TG    | 0.0585        | <b>0.0692</b> | 0.0678        | 0.0445        |
|                         | HDL-C | 0.0592        | 0.0424        | <b>0.1400</b> | 0.0442        |
|                         | LDL-C | 0.1164        | 0.0288        | 0.0640        | <b>0.1218</b> |

The other covariates were adjusted for these regressions.  
HDL-C, high-density lipoprotein cholesterol; LDL-C, low-density lipoprotein cholesterol; TC, total cholesterol; TG, triglyceride.

For peer review only

**Supplementary Table S2** Adjusted odds ratios for risks of adolescents' dyslipidemia based on mothers' lipids

|                 |               | Adolescents' lipids |            | OR         | 95% CI     | P value |
|-----------------|---------------|---------------------|------------|------------|------------|---------|
| Mothers' lipids | TG (mg/dl)    | ≤150                | >150       |            |            |         |
|                 |               | ≤150                | 157 (73.0) | ref        |            |         |
|                 |               | >150                | 403 (15.1) | 2.15       | 1.52, 3.03 | <.001   |
|                 | LDL-C (mg/dl) | ≤150                | >150       |            |            |         |
|                 |               | ≤150                | 31 (72.1)  | ref        |            |         |
|                 |               | >150                | 260 (9.2)  | 3.42       | 1.68, 7.00 | <.001   |
|                 | HDL-C (mg/dl) | <40                 | ≥40        |            |            |         |
|                 |               | <40                 | 215 (8.6)  | ref        |            |         |
|                 | ≥40           | 2287 (91.4)         | 0.33       | 0.24, 0.44 | <.001      |         |

The other covariates (baseline and clinical characteristics, health behavioral factors) were adjusted for these regressions

CI, confidence interval; HDL-C, high-density lipoprotein cholesterol; LDL-C, low-density lipoprotein cholesterol; OR, odds ratio; TG, triglyceride.

**Supplementary Table S3** Sensitivity test: Demographics and lipid profiles in 4,148 adolescents\* aged 12-18 years

|                 | No. (%)     | TC    |      |                             | TG    |      |                             | HDL-C <sup>†</sup> |      |                             | LDL-C <sup>§</sup> |      |                             |
|-----------------|-------------|-------|------|-----------------------------|-------|------|-----------------------------|--------------------|------|-----------------------------|--------------------|------|-----------------------------|
|                 |             | Mean  | SD   | <i>P</i> value <sup>†</sup> | Mean  | SD   | <i>P</i> value <sup>†</sup> | Mean               | SD   | <i>P</i> value <sup>†</sup> | Mean               | SD   | <i>P</i> value <sup>†</sup> |
| All (n=4148)    |             | 156.5 | 26.9 |                             | 83.9  | 47.0 |                             | 50.3               | 9.8  |                             | 89.5               | 23.1 |                             |
| Age (years)     |             |       |      | 0.252                       |       |      | 0.459                       |                    |      | 0.013                       |                    |      | 0.996                       |
| 12-14           | 1959 (47.2) | 156.9 | 26.4 |                             | 84.9  | 48.0 |                             | 50.7               | 9.7  |                             | 89.4               | 22.8 |                             |
| 15-18           | 2189 (52.8) | 156.2 | 27.3 |                             | 83.0  | 46.1 |                             | 49.9               | 9.8  |                             | 89.6               | 23.4 |                             |
| Sex             |             |       |      | <.001                       |       |      | 0.313                       |                    |      | <.001                       |                    |      | <.001                       |
| Male            | 2215 (53.4) | 151.4 | 26.8 |                             | 84.5  | 50.1 |                             | 48.6               | 9.4  |                             | 86.0               | 23.1 |                             |
| Female          | 1933 (46.6) | 162.4 | 25.8 |                             | 83.3  | 43.2 |                             | 52.3               | 9.8  |                             | 93.4               | 22.4 |                             |
| BMI*            |             |       |      | 0.024                       |       |      | <.001                       |                    |      | <.001                       |                    |      | <.001                       |
| <85%            | 3733 (90.0) | 156.0 | 26.5 |                             | 81.1  | 44.9 |                             | 51.0               | 9.7  |                             | 88.8               | 22.7 |                             |
| ≥85%            | 415 (10.0)  | 160.9 | 30.3 |                             | 108.8 | 57.1 |                             | 44.1               | 7.9  |                             | 95.0               | 26.0 |                             |
| Glucose (mg/dl) |             |       |      | 0.166                       |       |      | 0.134                       |                    |      | 0.765                       |                    |      | 0.142                       |
| ≤100            | 3935 (94.9) | 156.3 | 26.6 |                             | 83.5  | 46.7 |                             | 50.3               | 9.7  |                             | 89.3               | 22.8 |                             |
| >100            | 213 (5.1)   | 160.0 | 32.5 |                             | 90.4  | 52.7 |                             | 50.2               | 10.2 |                             | 92.8               | 27.9 |                             |

\*Included 1264 adolescents who have no mothers' data or inadequate baseline information

<sup>†</sup>*P* values determined by log normal distributions

<sup>‡</sup>Included 42 missing data (n=4106)

<sup>§</sup>Included 43 missing data (n=4105)

BMI, body mass index; HDL-C, high-density lipoprotein cholesterol; LDL-C, low-density lipoprotein cholesterol; SD, standard deviation; TC, total cholesterol; TG, triglyceride.

**STROBE 2007 (v4) Statement—Checklist of items that should be included in reports of *cross-sectional studies***

| Section/Topic                | Item # | Recommendation                                                                                                                                                                       | Reported on page # |
|------------------------------|--------|--------------------------------------------------------------------------------------------------------------------------------------------------------------------------------------|--------------------|
| <b>Title and abstract</b>    | 1      | (a) Indicate the study's design with a commonly used term in the title or the abstract                                                                                               | #1, #2             |
|                              |        | (b) Provide in the abstract an informative and balanced summary of what was done and what was found                                                                                  | #2, #3, #4         |
| <b>Introduction</b>          |        |                                                                                                                                                                                      |                    |
| Background/rationale         | 2      | Explain the scientific background and rationale for the investigation being reported                                                                                                 | #5                 |
| Objectives                   | 3      | State specific objectives, including any prespecified hypotheses                                                                                                                     | #5, #6             |
| <b>Methods</b>               |        |                                                                                                                                                                                      |                    |
| Study design                 | 4      | Present key elements of study design early in the paper                                                                                                                              | #6                 |
| Setting                      | 5      | Describe the setting, locations, and relevant dates, including periods of recruitment, exposure, follow-up, and data collection                                                      | #6, #7             |
| Participants                 | 6      | (a) Give the eligibility criteria, and the sources and methods of selection of participants                                                                                          | #6                 |
| Variables                    | 7      | Clearly define all outcomes, exposures, predictors, potential confounders, and effect modifiers. Give diagnostic criteria, if applicable                                             | #6, #7             |
| Data sources/<br>measurement | 8*     | For each variable of interest, give sources of data and details of methods of assessment (measurement). Describe comparability of assessment methods if there is more than one group | #7                 |
| Bias                         | 9      | Describe any efforts to address potential sources of bias                                                                                                                            | #7, #8             |
| Study size                   | 10     | Explain how the study size was arrived at                                                                                                                                            | #6                 |
| Quantitative variables       | 11     | Explain how quantitative variables were handled in the analyses. If applicable, describe which groupings were chosen and why                                                         | #7, #8             |
| Statistical methods          | 12     | (a) Describe all statistical methods, including those used to control for confounding                                                                                                | #7, #8             |
|                              |        | (b) Describe any methods used to examine subgroups and interactions                                                                                                                  | #8                 |
|                              |        | (c) Explain how missing data were addressed                                                                                                                                          | #6                 |
|                              |        | (d) If applicable, describe analytical methods taking account of sampling strategy                                                                                                   | #8                 |
|                              |        | (e) Describe any sensitivity analyses                                                                                                                                                | #8                 |
| <b>Results</b>               |        |                                                                                                                                                                                      |                    |

|                          |     |                                                                                                                                                                                                              |                    |
|--------------------------|-----|--------------------------------------------------------------------------------------------------------------------------------------------------------------------------------------------------------------|--------------------|
| Participants             | 13* | (a) Report numbers of individuals at each stage of study—eg numbers potentially eligible, examined for eligibility, confirmed eligible, included in the study, completing follow-up, and analysed            | #6                 |
|                          |     | (b) Give reasons for non-participation at each stage                                                                                                                                                         | #6                 |
|                          |     | (c) Consider use of a flow diagram                                                                                                                                                                           | #6                 |
| Descriptive data         | 14* | (a) Give characteristics of study participants (eg demographic, clinical, social) and information on exposures and potential confounders                                                                     | #8, #9             |
|                          |     | (b) Indicate number of participants with missing data for each variable of interest                                                                                                                          | #6                 |
| Outcome data             | 15* | Report numbers of outcome events or summary measures                                                                                                                                                         | #8                 |
| Main results             | 16  | (a) Give unadjusted estimates and, if applicable, confounder-adjusted estimates and their precision (eg, 95% confidence interval). Make clear which confounders were adjusted for and why they were included | #8, #9, #10        |
|                          |     | (b) Report category boundaries when continuous variables were categorized                                                                                                                                    | #7                 |
|                          |     | (c) If relevant, consider translating estimates of relative risk into absolute risk for a meaningful time period                                                                                             | #9, #10            |
| Other analyses           | 17  | Report other analyses done—eg analyses of subgroups and interactions, and sensitivity analyses                                                                                                               | #10, #11           |
| <b>Discussion</b>        |     |                                                                                                                                                                                                              |                    |
| Key results              | 18  | Summarise key results with reference to study objectives                                                                                                                                                     | #11                |
| Limitations              | 19  | Discuss limitations of the study, taking into account sources of potential bias or imprecision. Discuss both direction and magnitude of any potential bias                                                   | #14, #15           |
| Interpretation           | 20  | Give a cautious overall interpretation of results considering objectives, limitations, multiplicity of analyses, results from similar studies, and other relevant evidence                                   | #11, #12, #13, #14 |
| Generalisability         | 21  | Discuss the generalisability (external validity) of the study results                                                                                                                                        | #11                |
| <b>Other information</b> |     |                                                                                                                                                                                                              |                    |
| Funding                  | 22  | Give the source of funding and the role of the funders for the present study and, if applicable, for the original study on which the present article is based                                                | #15                |

\*Give information separately for cases and controls in case-control studies and, if applicable, for exposed and unexposed groups in cohort and cross-sectional studies.

**Note:** An Explanation and Elaboration article discusses each checklist item and gives methodological background and published examples of transparent reporting. The STROBE checklist is best used in conjunction with this article (freely available on the Web sites of PLoS Medicine at <http://www.plosmedicine.org/>, Annals of Internal Medicine at <http://www.annals.org/>, and Epidemiology at <http://www.epidem.com/>). Information on the STROBE Initiative is available at [www.strobe-statement.org](http://www.strobe-statement.org).
