# Supplementary material for: Associations between lipid profiles of adolescents and their mothers based on a nationwide health and nutrition survey in South Korea
Source: PubMed Central journal article supplement — BMJ Open. 2019 Mar 20;9(3):e024731. doi: 10.1136/bmjopen-2018-024731 (PMC6475165; doi:10.1136/bmjopen-2018-024731), 2019-03-20
Supplement: bmjopen-2018-024731supp001.pdf [file bmjopen-2018-024731supp001.pdf]

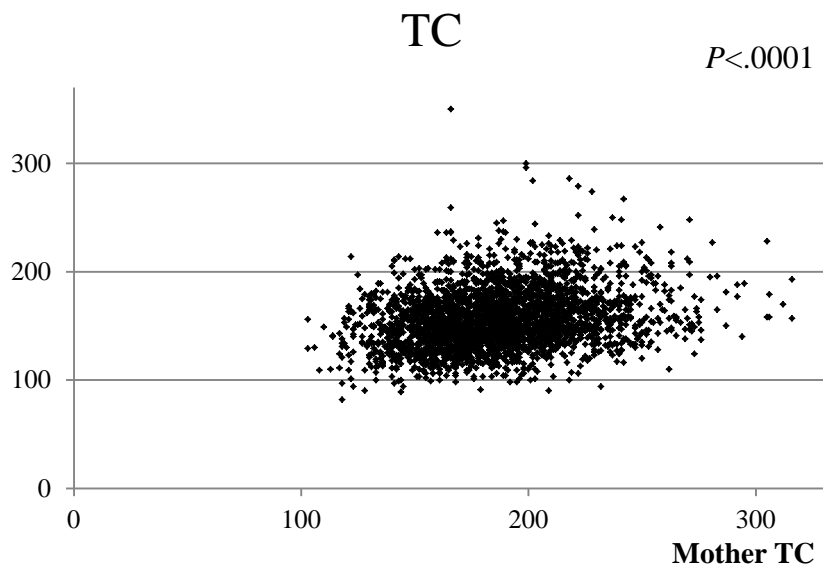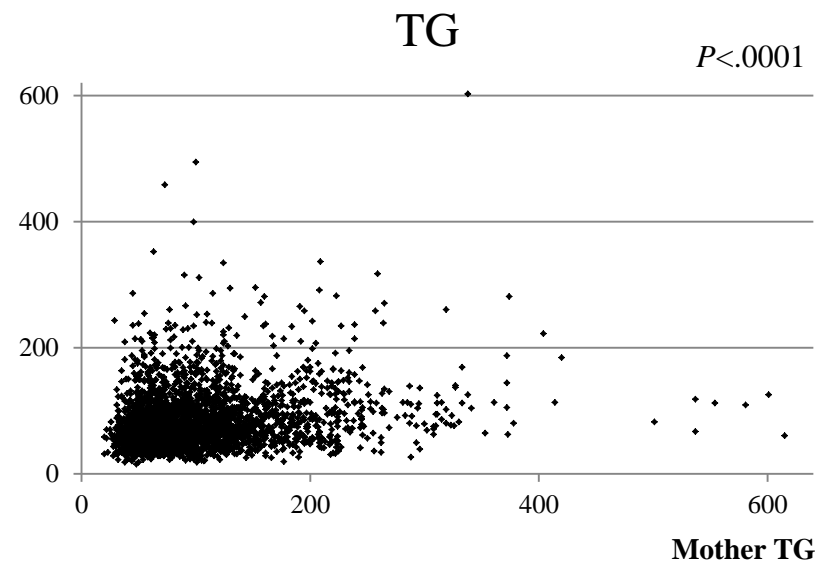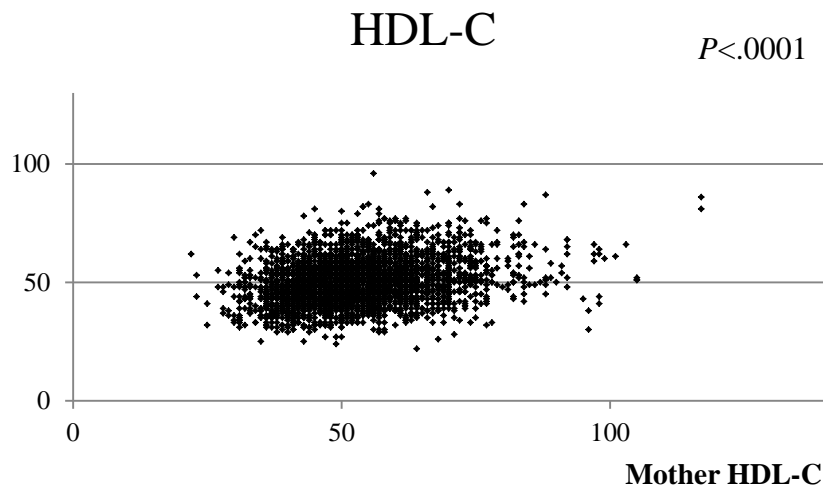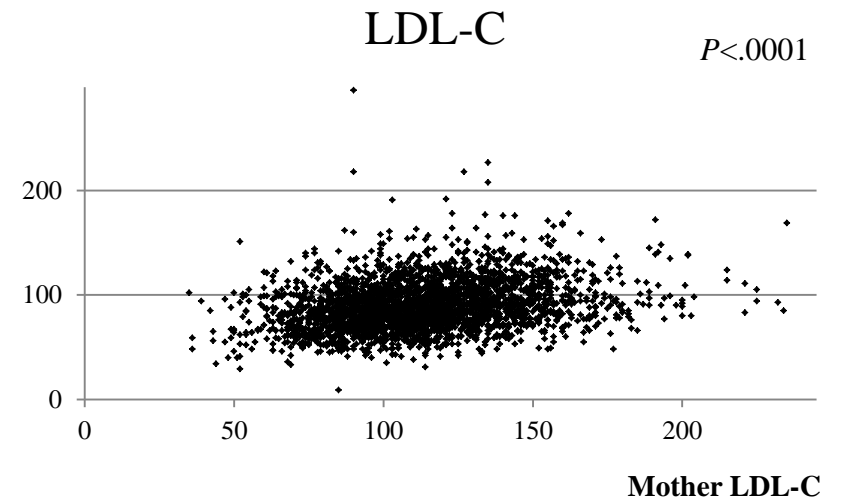

**Supplementary Figure S1** Dot plots of correlations between adolescent's and mother's lipids. HDL-C, high-density lipoprotein cholesterol; LDL-C, low-density lipoprotein cholesterol; TC, total cholesterol; TG, triglyceride.
