# Supplementary material for: Associations between lipid profiles of adolescents and their mothers based on a nationwide health and nutrition survey in South Korea
Source: PubMed Central journal article supplement — BMJ Open. 2019 Mar 20;9(3):e024731. doi: 10.1136/bmjopen-2018-024731 (PMC6475165; doi:10.1136/bmjopen-2018-024731), 2019-03-20
Supplement: bmjopen-2018-024731supp002.pdf [file bmjopen-2018-024731supp002.pdf]

**Supplementary Table S1** Adjusted R squares for regression models of lipid profiles between adolescent and mother

| Adjusted R <sup>2</sup> |       | Adolescents   |               |               |               |
|-------------------------|-------|---------------|---------------|---------------|---------------|
|                         |       | TC            | TG            | HDL-C         | LDL-C         |
| Mothers                 | TC    | <b>0.1245</b> | 0.0296        | 0.0723        | 0.1095        |
|                         | TG    | 0.0585        | <b>0.0692</b> | 0.0678        | 0.0445        |
|                         | HDL-C | 0.0592        | 0.0424        | <b>0.1400</b> | 0.0442        |
|                         | LDL-C | 0.1164        | 0.0288        | 0.0640        | <b>0.1218</b> |

The other covariates were adjusted for these regressions.

HDL-C, high-density lipoprotein cholesterol; LDL-C, low-density lipoprotein cholesterol; TC, total cholesterol; TG, triglyceride.
