# Supplementary material for: Associations between lipid profiles of adolescents and their mothers based on a nationwide health and nutrition survey in South Korea
Source: PubMed Central journal article supplement — BMJ Open. 2019 Mar 20;9(3):e024731. doi: 10.1136/bmjopen-2018-024731 (PMC6475165; doi:10.1136/bmjopen-2018-024731), 2019-03-20
Supplement: bmjopen-2018-024731supp003.pdf [file bmjopen-2018-024731supp003.pdf]

**Supplementary Table S2** Adjusted odds ratios for risks of adolescents' dyslipidemia based on mothers' lipids

|                 |               | Adolescents' lipids |            | OR         | 95% CI     | P value |
|-----------------|---------------|---------------------|------------|------------|------------|---------|
| Mothers' lipids | TG (mg/dl)    | ≤150                | >150       |            |            |         |
|                 |               | ≤150                | 157 (73.0) | ref        |            |         |
|                 |               | >150                | 403 (15.1) | 2.15       | 1.52, 3.03 | <.001   |
|                 | LDL-C (mg/dl) | ≤150                | >150       |            |            |         |
|                 |               | ≤150                | 31 (72.1)  | ref        |            |         |
|                 |               | >150                | 260 (9.2)  | 3.42       | 1.68, 7.00 | <.001   |
| HDL-C (mg/dl)   | <40           | ≥40                 |            |            |            |         |
|                 | <40           | 215 (8.6)           | ref        |            |            |         |
|                 | ≥40           | 2287 (91.4)         | 0.33       | 0.24, 0.44 | <.001      |         |

The other covariates (baseline and clinical characteristics, health behavioral factors) were adjusted for these regressions

CI, confidence interval; HDL-C, high-density lipoprotein cholesterol; LDL-C, low-density lipoprotein cholesterol; OR, odds ratio; TG, triglyceride.
