# Supplementary material for: Associations between lipid profiles of adolescents and their mothers based on a nationwide health and nutrition survey in South Korea
Source: PubMed Central journal article supplement — BMJ Open. 2019 Mar 20;9(3):e024731. doi: 10.1136/bmjopen-2018-024731 (PMC6475165; doi:10.1136/bmjopen-2018-024731), 2019-03-20
Supplement: bmjopen-2018-024731supp004.pdf [file bmjopen-2018-024731supp004.pdf]

**Supplementary Table S3** Sensitivity test: Demographics and lipid profiles in 4,148 adolescents\* aged 12-18 years

|                 | No. (%)     | TC    |      |                             | TG    |      |                             | HDL-C <sup>‡</sup> |      |                             | LDL-C <sup>§</sup> |      |                             |
|-----------------|-------------|-------|------|-----------------------------|-------|------|-----------------------------|--------------------|------|-----------------------------|--------------------|------|-----------------------------|
|                 |             | Mean  | SD   | <i>P</i> value <sup>†</sup> | Mean  | SD   | <i>P</i> value <sup>†</sup> | Mean               | SD   | <i>P</i> value <sup>†</sup> | Mean               | SD   | <i>P</i> value <sup>†</sup> |
| All (n=4148)    |             | 156.5 | 26.9 |                             | 83.9  | 47.0 |                             | 50.3               | 9.8  |                             | 89.5               | 23.1 |                             |
| Age (years)     |             |       |      | 0.252                       |       |      | 0.459                       |                    |      | 0.013                       |                    |      | 0.996                       |
| 12-14           | 1959 (47.2) | 156.9 | 26.4 |                             | 84.9  | 48.0 |                             | 50.7               | 9.7  |                             | 89.4               | 22.8 |                             |
| 15-18           | 2189 (52.8) | 156.2 | 27.3 |                             | 83.0  | 46.1 |                             | 49.9               | 9.8  |                             | 89.6               | 23.4 |                             |
| Sex             |             |       |      | <.001                       |       |      | 0.313                       |                    |      | <.001                       |                    |      | <.001                       |
| Male            | 2215 (53.4) | 151.4 | 26.8 |                             | 84.5  | 50.1 |                             | 48.6               | 9.4  |                             | 86.0               | 23.1 |                             |
| Female          | 1933 (46.6) | 162.4 | 25.8 |                             | 83.3  | 43.2 |                             | 52.3               | 9.8  |                             | 93.4               | 22.4 |                             |
| BMI*            |             |       |      | 0.024                       |       |      | <.001                       |                    |      | <.001                       |                    |      | <.001                       |
| <85%            | 3733 (90.0) | 156.0 | 26.5 |                             | 81.1  | 44.9 |                             | 51.0               | 9.7  |                             | 88.8               | 22.7 |                             |
| ≥85%            | 415 (10.0)  | 160.9 | 30.3 |                             | 108.8 | 57.1 |                             | 44.1               | 7.9  |                             | 95.0               | 26.0 |                             |
| Glucose (mg/dl) |             |       |      | 0.166                       |       |      | 0.134                       |                    |      | 0.765                       |                    |      | 0.142                       |
| ≤100            | 3935 (94.9) | 156.3 | 26.6 |                             | 83.5  | 46.7 |                             | 50.3               | 9.7  |                             | 89.3               | 22.8 |                             |
| >100            | 213 (5.1)   | 160.0 | 32.5 |                             | 90.4  | 52.7 |                             | 50.2               | 10.2 |                             | 92.8               | 27.9 |                             |

\*Included 1264 adolescents who have no mothers' data or inadequate baseline information

<sup>†</sup>*P* values determined by log normal distributions

<sup>‡</sup>Included 42 missing data (n=4106)

<sup>§</sup>Included 43 missing data (n=4105)

BMI, body mass index; HDL-C, high-density lipoprotein cholesterol; LDL-C, low-density lipoprotein cholesterol; SD, standard deviation; TC, total cholesterol; TG, triglyceride.
